# Supplementary material for: Semi-synthesis and insecticidal activity of spinetoram J and its D-forosamine replacement analogues
Source: publisher site journal article supplement (doi:10.3762/bjoc.14.207), 2018-09-04

**Supporting Information**  
**for**  
**Semi-synthesis and insecticidal activity of spinetoram**  
**J and its D-forosamine replacement analogues**

Kai Zhang<sup>1</sup>, Jiarong Li<sup>\*1</sup>, Honglin Liu<sup>2</sup>, Haiyou Wang<sup>2</sup> and Lamusi A<sup>\*2</sup>

Address: <sup>1</sup>School of Chemistry and Chemical Engineering, Beijing Institute of Technology, 5 South Zhongguancun Street, Haidian District, Beijing, P. R. China and

<sup>2</sup>Institute of Grassland Research of CAAS, No. 120 Wulanchabu East Street, Saihan District, Hohhot, P. R. China

Email: Jiarong Li - [jrligroup@126.com](mailto:jrligroup@126.com)

\*Corresponding author

**Details for the synthesis of spinetoram J analogues, analytical data**  
**of all compounds, NMR spectra and MS data**  
**of all synthesized compounds**

## Experimental

### Preparation of 7b

Compound **5** (0.36 g, 0.59 mmol) and cyclopropylmethyl-2,2,2-trichloroacetimidate (0.15 g, 0.71 mmol) were dissolved in 15 mL dry CH<sub>2</sub>Cl<sub>2</sub> with some molecular sieve under Ar. Then BF<sub>3</sub>·(C<sub>2</sub>H<sub>5</sub>)<sub>2</sub>O (0.13 mL, 1.02 mmol) was added at room temperature. The mixture was stirred for 22 h, then diluted with CH<sub>2</sub>Cl<sub>2</sub> (15 mL) and washed with saturated sodium bicarbonate solution (3 × 10 mL). The combined organic layers were dried with Na<sub>2</sub>SO<sub>4</sub> and evaporated under reduced pressure. The residue was purified by column chromatography on silica gel (200–300 mesh) to afford pure **7b** (0.23 g, yield 59%). TLC (ethyl acetate : petroleum ether = 1:2, v:v). <sup>1</sup>H NMR (400 MHz, CDCl<sub>3</sub>) δ: 6.75 (s, 1H, C<sub>13</sub>-H), 4.82 (s, 1H, C<sub>1</sub>'-H), 4.67 (m, 1H, C<sub>21</sub>-H), 4.50 (m, 1H, C<sub>9</sub>-H), 4.06 (m, 1H, C<sub>2</sub>'-H), 3.57 (m, 1H, C<sub>17</sub>-H), 3.46-3.31 (m, 12H, C<sub>5</sub>'-H, C<sub>4</sub>-H, C<sub>3</sub>'-OCH<sub>2</sub>-, C<sub>2</sub>'-OCH<sub>3</sub>, C<sub>4</sub>'-OCH<sub>3</sub>, C<sub>3</sub>'-H, C<sub>16</sub>-H), 3.23 (m, 1H, one of C<sub>2</sub>-H), 2.99-2.95 (m, 2H, C<sub>3</sub>-H, C<sub>4</sub>'-H), 2.80 (m, 1H, C<sub>12</sub>-H), 2.67 (m, 1H, one of C<sub>2</sub>-H), 2.43 (m, 2H, C<sub>10</sub>-H), 2.16 (m, 1H, C<sub>7</sub>-H), 1.94 (m, 1H, one of C<sub>8</sub>-H), 1.67 (m, 2H, one of C<sub>5</sub>-H, one of C<sub>6</sub>-H), 1.58 (m, 1H, C<sub>2</sub>'-H), 1.47-1.42 (m, 7H, one of C<sub>8</sub>-H, C<sub>18</sub>-H, one of C<sub>19</sub>-H, one of C<sub>20</sub>-H, C<sub>22</sub>-H), 1.34-1.32 (m, 5H, one of C<sub>19</sub>-H, one of C<sub>20</sub>-H, C<sub>6</sub>'-H), 1.20-1.10 (m, 8H, one of C<sub>5</sub>-H, one of C<sub>6</sub>-H, C<sub>16</sub>-CH<sub>3</sub>, C<sub>3</sub>'-OC-CH<sub>3</sub>), 0.97-0.90 (m, 5H, C<sub>3</sub>'-H, C<sub>4</sub>'-H, C<sub>11</sub>-H), 0.77 (t, 3H, C<sub>23</sub>-H); <sup>13</sup>C NMR (101 MHz, CDCl<sub>3</sub>) δ: 201.48, 174.28, 172.41, 149.15, 144.99, 95.71, 82.08, 79.48, 78.36, 76.27, 75.70, 74.66, 67.80, 65.39, 60.69, 58.90, 50.03, 49.04, 47.75, 46.34, 45.60, 43.20, 40.84, 39.44, 38.65, 37.94, 32.79, 32.34, 29.94, 28.04, 27.35, 26.83, 21.32, 17.57, 15.50, 12.57, 8.15, 8.01; MS (MALDI) cal for C<sub>38</sub>H<sub>60</sub>O<sub>9</sub> [M+Na]<sup>+</sup> 683.412954, found [M+ Na]<sup>+</sup> 683.413206.

### Preparation of 7c

Compound **5** (0.34 g, 0.56 mmol) and 3,5-dimethoxybenzy-2,2,2-trichloroacetimidate (0.19 g, 0.61 mmol) were dissolved in 15 mL dry CH<sub>2</sub>Cl<sub>2</sub> with some molecular sieve under Ar. Then BF<sub>3</sub>·(C<sub>2</sub>H<sub>5</sub>)<sub>2</sub>O (0.11 mL, 1.00 mmol) was added at room temperature. The mixture was stirred for 18 h, then diluted with CH<sub>2</sub>Cl<sub>2</sub> (15 mL) and washed with saturated sodium bicarbonate solution (3 × 10 mL). The combined

organic layers were dried with Na<sub>2</sub>SO<sub>4</sub> and evaporated under reduced pressure. The residue was purified by column chromatography on silica gel (200–300 mesh) to afford pure **7c** (0.26 g, yield 61%). TLC (ethyl acetate : petroleum ether = 1:2, v:v). <sup>1</sup>H NMR (400 MHz, CDCl<sub>3</sub>) δ: 6.79 (s, 1H, C<sub>13</sub>-H), 6.45-6.31 (m, 3H, C<sub>3</sub>'-H, C<sub>5</sub>'-H, C<sub>7</sub>'-H), 5.04 (s, 1H, C<sub>1</sub>'-H), 4.74 (s, 2H, C<sub>1</sub>'-H), 4.57 (m, 1H, C<sub>21</sub>-H), 4.14 (m, 1H, C<sub>9</sub>-H), 3.72 (s, 6H, C<sub>4</sub>'-OCH<sub>3</sub>, C<sub>6</sub>'-OCH<sub>3</sub>), 3.67-3.60 (m, 2H, C<sub>2</sub>'-H, C<sub>17</sub>-H), 3.55-3.43 (m, 11H, C<sub>3</sub>'-OCH<sub>2</sub>-, C<sub>4</sub>'-OCH<sub>3</sub>, C<sub>5</sub>'-H, C<sub>4</sub>-H, C<sub>2</sub>'-OCH<sub>3</sub>, C<sub>3</sub>'-H), 3.36 (m, 1H, C<sub>16</sub>-H), 3.11-2.99 (m, 2H, one of C<sub>2</sub>-H, C<sub>3</sub>-H), 2.89 (m, 1H, C<sub>4</sub>'-H), 2.74 (m, 1H, C<sub>12</sub>-H), 2.38 (m, 1H, one of C<sub>2</sub>-H), 2.28 (m, 1H, C<sub>7</sub>-H), 2.18 (m, 2H, C<sub>10</sub>-H), 1.74-1.49 (m, 12H, one of C<sub>8</sub>-H, C<sub>5</sub>-H, C<sub>6</sub>-H, one of C<sub>8</sub>-H, C<sub>18</sub>-H, one of C<sub>19</sub>-H, one of C<sub>20</sub>-H, C<sub>22</sub>-H), 1.20-1.11 (m, 11H, one of C<sub>19</sub>-H, one of C<sub>20</sub>-H, C<sub>6</sub>'-H, C<sub>16</sub>-CH<sub>3</sub>, C<sub>3</sub>'-OC-CH<sub>3</sub>), 1.01 (m, 1H, C<sub>11</sub>-H), 0.76 (t, 3H, C<sub>23</sub>-H); <sup>13</sup>C NMR (101 MHz, CDCl<sub>3</sub>) δ: 201.72, 171.47, 159.98, 159.85, 148.51, 144.86, 143.89, 104.77, 103.56, 99.52, 94.81, 81.22, 78.69, 77.55, 74.73, 74.58, 68.41, 66.98, 64.58, 59.98, 58.20, 54.35, 54.32, 49.18, 47.10, 45.48, 44.73, 42.53, 39.94, 38.56, 37.77, 37.06, 33.67, 31.84, 30.89, 29.04, 27.19, 25.97, 20.20, 16.84, 15.33, 14.74, 8.36; MS (MALDI) cal for C<sub>43</sub>H<sub>64</sub>O<sub>11</sub> [M+Na]<sup>+</sup> 779.434084, found [M+ Na]<sup>+</sup> 779.434141.

### Preparation of **7d**

Compound **5** (0.33 g, 0.54 mmol) and 4-chlorobenzyl-2,2,2-trichloroacetimidate (0.18 g, 0.63 mmol) were dissolved in 15 mL dry CH<sub>2</sub>Cl<sub>2</sub> with some molecular sieve under Ar. Then BF<sub>3</sub>·(C<sub>2</sub>H<sub>5</sub>)<sub>2</sub>O (0.14 mL, 1.03 mmol) was added at room temperature. The mixture was stirred for 26 h, then diluted with CH<sub>2</sub>Cl<sub>2</sub> (15 mL) and washed with saturated sodium bicarbonate solution (3 × 10 mL). The combined organic layers were dried with Na<sub>2</sub>SO<sub>4</sub> and evaporated under reduced pressure. The residue was purified by column chromatography on silica gel (200–300 mesh) to afford pure **7d** (0.31 g, yield 79%). TLC (ethyl acetate : petroleum ether = 1:2, v:v). <sup>1</sup>H NMR (400 MHz, CDCl<sub>3</sub>) δ: 7.24-7.13 (m, 4H, C<sub>3</sub>'-H, C<sub>4</sub>'-H, C<sub>6</sub>'-H, C<sub>7</sub>'-H), 6.79 (s, 1H, C<sub>13</sub>-H), 4.98 (s, 1H, C<sub>1</sub>'-H), 4.73 (m, 1H, C<sub>21</sub>-H), 4.60 (s, 2H, C<sub>1</sub>'-H), 4.37 (m, 1H, C<sub>9</sub>-H), 4.15 (m, 1H, C<sub>2</sub>'-H), 4.01 (m, 1H, C<sub>17</sub>-H), 3.55-3.42 (m, 11H, C<sub>3</sub>'-OCH<sub>2</sub>-, C<sub>4</sub>'-OCH<sub>3</sub>, C<sub>5</sub>'-H, C<sub>4</sub>-H, C<sub>2</sub>'-OCH<sub>3</sub>, C<sub>3</sub>'-H), 3.28 (m, 1H, C<sub>16</sub>-H), 3.13-2.79 (m, 4H, one of C<sub>2</sub>-H, C<sub>3</sub>-H, C<sub>4</sub>'-H,

C<sub>12</sub>-H), 2.42 (m, 1H, one of C<sub>2</sub>-H), 2.28 (m, 1H, C<sub>7</sub>-H), 2.16 (m, 2H, C<sub>10</sub>-H), 1.85-1.35 (m, 12H, one of C<sub>8</sub>-H, C<sub>5</sub>-H, C<sub>6</sub>-H, one of C<sub>8</sub>-H, C<sub>18</sub>-H, one of C<sub>19</sub>-H, one of C<sub>20</sub>-H, C<sub>22</sub>-H), 1.27-1.13 (m, 11H, one of C<sub>19</sub>-H, one of C<sub>20</sub>-H, C<sub>6</sub>'-H, C<sub>16</sub>-CH<sub>3</sub>, C<sub>3</sub>'-OC-CH<sub>3</sub>), 1.02 (m, 1H, C<sub>11</sub>-H), 0.83 (t, 3H, C<sub>23</sub>-H); <sup>13</sup>C NMR (101 MHz, CDCl<sub>3</sub>) δ: 202.06, 162.78, 148.47, 145.03, 128.71, 128.26, 128.11, 127.82, 127.61, 127.25, 90.89, 81.01, 78.63, 77.57, 77.19, 70.82, 67.26, 66.96, 64.60, 63.42, 59.97, 58.15, 49.13, 45.32, 43.18, 42.58, 41.16, 39.78, 37.81, 37.07, 35.72, 32.43, 29.57, 28.44, 26.70, 23.96, 23.69, 18.13, 16.80, 14.71, 9.07; MS (MALDI) cal for C<sub>41</sub>H<sub>59</sub>ClO<sub>9</sub> [M+Na]<sup>+</sup> 753.373982, found [M+ Na]<sup>+</sup> 753.373992.

### Preparation of 7e

Compound **5** (0.35 g, 0.58 mmol) and 2,6-difluorobenzyl-2,2,2-trichloroacetimidate (0.19 g, 0.66 mmol) were dissolved in 15 mL dry CH<sub>2</sub>Cl<sub>2</sub> with some molecular sieve under Ar. Then BF<sub>3</sub>·(C<sub>2</sub>H<sub>5</sub>)<sub>2</sub>O (0.12 mL, 1.01 mmol) was added at room temperature. The mixture was stirred for 23 h, then diluted with CH<sub>2</sub>Cl<sub>2</sub> (15 mL) and washed with saturated sodium bicarbonate solution (3 × 10 mL). The combined organic layers were dried with Na<sub>2</sub>SO<sub>4</sub> and evaporated under reduced pressure. The residue was purified by column chromatography on silica gel (200–300 mesh) to afford pure **7e** (0.34 g, yield 80%). TLC (ethyl acetate : petroleum ether = 1:2, v:v). <sup>1</sup>H NMR (400 MHz, CDCl<sub>3</sub>) δ: 6.97-6.68 (m, 4H, C<sub>4</sub>'-H, C<sub>5</sub>'-H, C<sub>6</sub>'-H, C<sub>13</sub>-H), 4.72 (s, 1H, C<sub>1</sub>'-H), 4.57 (s, 2H, C<sub>1</sub>'-H), 4.48 (m, 1H, C<sub>21</sub>-H), 4.22 (m, 1H, C<sub>9</sub>-H), 4.02 (m, 1H, C<sub>2</sub>-H), 3.63 (m, 1H, C<sub>17</sub>-H), 3.54-3.41 (m, 11H, C<sub>3</sub>'-OCH<sub>2</sub>-, C<sub>4</sub>'-OCH<sub>3</sub>, C<sub>5</sub>'-H, C<sub>4</sub>-H, C<sub>2</sub>'-OCH<sub>3</sub>, C<sub>3</sub>'-H), 3.18-3.02 (m, 3H, C<sub>16</sub>-H, one of C<sub>2</sub>-H, C<sub>3</sub>-H), 2.86 (m, 1H, C<sub>4</sub>'-H), 2.72 (m, 1H, C<sub>12</sub>-H), 2.43 (m, 1H, one of C<sub>2</sub>-H), 2.32 (m, 2H, C<sub>10</sub>-H), 2.17 (m, 1H, C<sub>7</sub>-H), 1.95 (m, 1H, one of C<sub>8</sub>-H), 1.72-1.41 (m, 11H, C<sub>5</sub>-H, C<sub>6</sub>-H, one of C<sub>8</sub>-H, C<sub>18</sub>-H, one of C<sub>19</sub>-H, one of C<sub>20</sub>-H, C<sub>22</sub>-H), 1.33-1.17 (m, 11H, one of C<sub>19</sub>-H, one of C<sub>20</sub>-H, C<sub>6</sub>'-H, C<sub>16</sub>-CH<sub>3</sub>, C<sub>3</sub>'-OC-CH<sub>3</sub>), 0.96 (m, 1H, C<sub>11</sub>-H), 0.74 (t, 3H, C<sub>23</sub>-H); <sup>13</sup>C NMR (101 MHz, CDCl<sub>3</sub>) δ: 203.07, 172.37, 163.55, 163.12, 149.00, 144.76, 130.08, 113.92, 111.31, 111.06, 95.65, 82.11, 80.77, 79.44, 78.47, 76.21, 75.61, 67.84, 65.45, 60.75, 60.23, 58.99, 50.22, 46.70, 46.17, 43.56, 40.66, 39.44, 38.67, 38.06, 33.35, 31.66, 30.40, 27.95, 26.84, 24.62, 20.51, 17.72, 16.88, 15.63, 9.25; MS (MALDI) cal for



$C_{41}H_{58}F_2O_9$   $[M+Na]^+$  755.394111, found  $[M+Na]^+$  755.393714.

### Preparation of 7f

Compound **5** (0.34 g, 0.56 mmol) and 3-trifluoromethylbenzyl-2,2,2-trichloroacetimidate (0.21 g, 0.66 mmol) were dissolved in 15 mL dry  $CH_2Cl_2$  with some molecular sieve under Ar. Then  $BF_3 \cdot (C_2H_5)_2O$  (0.15 mL, 1.03 mmol) was added at room temperature. The mixture was stirred for 18 h, then diluted with  $CH_2Cl_2$  (15 mL) and washed with saturated sodium bicarbonate solution ( $3 \times 10$  mL). The combined organic layers were dried with  $Na_2SO_4$  and evaporated under reduced pressure. The residue was purified by column chromatography on silica gel (200–300 mesh) to afford pure **7f** (0.33 g, yield 77%). TLC (ethyl acetate : petroleum ether = 1:2, v:v).  $^1H$  NMR (400 MHz,  $CDCl_3$ )  $\delta$ : 7.56-7.40 (m, 4H,  $C_3''$ -H,  $C_5''$ -H,  $C_6''$ -H,  $C_7''$ -H), 6.81 (s, 1H,  $C_{13}$ -H), 6.64-6.48 (m, 3H,  $C_{16}$ -H, one of  $C_2$ -H,  $C_3$ -H), 4.83-4.57 (m, 6H,  $C_{1'}$ -H,  $C_{21}$ -H,  $C_{1''}$ -H,  $C_9$ -H,  $C_2'$ -H), 4.14 (m, 1H,  $C_{17}$ -H), 3.64-3.27 (m, 11H,  $C_3'$ -OCH<sub>2</sub>-,  $C_4'$ -OCH<sub>3</sub>,  $C_5'$ -H,  $C_4$ -H,  $C_2'$ -OCH<sub>3</sub>,  $C_3''$ -H), 2.95 (m, 1H,  $C_4'$ -H), 2.79 (m, 1H,  $C_{12}$ -H), 2.52-2.15 (m, 4H, one of  $C_2$ -H,  $C_7$ -H,  $C_{10}$ -H), 1.96 (m, 1H, one of  $C_8$ -H), 1.86-1.30 (m, 11H,  $C_5$ -H,  $C_6$ -H, one of  $C_8$ -H,  $C_{18}$ -H, one of  $C_{19}$ -H, one of  $C_{20}$ -H,  $C_{22}$ -H), 1.27-1.11 (m, 11H, one of  $C_{19}$ -H, one of  $C_{20}$ -H,  $C_6'$ -H,  $C_{16}$ -CH<sub>3</sub>,  $C_3'$ -OC-CH<sub>3</sub>), 0.91 (m, 1H,  $C_{11}$ -H), 0.75 (t, 3H,  $C_{23}$ -H);  $^{13}C$  NMR (101 MHz,  $CDCl_3$ )  $\delta$ : 202.38, 171.60, 162.94, 148.46, 143.79, 140.83, 129.97, 129.03, 127.91, 123.26, 122.48, 94.72, 90.90, 81.21, 80.09, 78.58, 77.59, 74.73, 70.87, 70.19, 66.95, 64.63, 63.35, 59.91, 58.13, 49.29, 45.98, 45.33, 42.58, 39.78, 38.58, 37.75, 37.11, 32.46, 29.52, 27.01, 25.90, 23.66, 18.11, 16.79, 14.69, 8.32; MS (MALDI) cal for  $C_{42}H_{59}F_3O_9$   $[M+Na]^+$  787.400339, found  $[M+Na]^+$  787.400000.

### Preparation of 7g

Compound **5** (0.35 g, 0.58 mmol) and 2-fluorobenzyl-2,2,2-trichloroacetimidate (0.18 g, 0.67 mmol) were dissolved in 15 mL dry  $CH_2Cl_2$  with some molecular sieve under Ar. Then  $BF_3 \cdot (C_2H_5)_2O$  (0.12 mL, 1.01 mmol) was added at room temperature. The mixture was stirred for 22 h, then diluted with  $CH_2Cl_2$  (15 mL) and washed with saturated sodium bicarbonate solution ( $3 \times 10$  mL). The combined organic layers were dried with  $Na_2SO_4$  and evaporated under reduced pressure. The residue was purified

by column chromatography on silica gel (200–300 mesh) to afford pure **7g** (0.29 g, yield 70%). TLC (ethyl acetate : petroleum ether = 1:2, v:v).  $^1\text{H}$  NMR (700 MHz,  $\text{CDCl}_3$ )  $\delta$ : 7.43 (m, 1H,  $\text{C}_5\text{'-H}$ ), 7.26 (m, 1H,  $\text{C}_4\text{'-H}$ ), 7.14 (m, 1H,  $\text{C}_7\text{'-H}$ ), 7.04 (m, 1H,  $\text{C}_6\text{'-H}$ ), 6.86 (s, 1H,  $\text{C}_{13}\text{'-H}$ ), 4.80 (s, 1H,  $\text{C}_1\text{'-H}$ ), 4.64 (m, 1H,  $\text{C}_{21}\text{'-H}$ ), 4.21 (m, 1H,  $\text{C}_9\text{'-H}$ ), 3.72 (m, 1H,  $\text{C}_2\text{'-H}$ ), 3.62 (m, 1H,  $\text{C}_{17}\text{'-H}$ ), 3.57–3.55 (m, 5H,  $\text{C}_3\text{'-OCH}_2\text{-}$ ,  $\text{C}_4\text{'-OCH}_3$ ), 3.54 (m, 1H,  $\text{C}_5\text{'-H}$ ), 3.51 (m, 1H,  $\text{C}_4\text{'-H}$ ), 3.49 (s, 3H,  $\text{C}_2\text{'-OCH}_3$ ), 3.44 (m, 1H,  $\text{C}_3\text{'-H}$ ), 3.15–3.09 (m, 3H,  $\text{C}_{16}\text{'-H}$ , one of  $\text{C}_2\text{'-H}$ ,  $\text{C}_3\text{'-H}$ ), 2.94 (m, 1H,  $\text{C}_4\text{'-H}$ ), 2.81 (m, 1H,  $\text{C}_{12}\text{'-H}$ ), 2.58 (m, 1H,  $\text{C}_7\text{'-H}$ ), 2.36 (dd, 1H,  $J=14\text{Hz}$ , one of  $\text{C}_2\text{'-H}$ ), 2.25 (m, 2H,  $\text{C}_{10}\text{'-H}$ ), 1.93 (m, 1H, one of  $\text{C}_8\text{'-H}$ ), 1.68–1.47 (m, 11H,  $\text{C}_5\text{'-H}$ ,  $\text{C}_6\text{'-H}$ , one of  $\text{C}_8\text{'-H}$ ,  $\text{C}_{18}\text{'-H}$ , one of  $\text{C}_{19}\text{'-H}$ , one of  $\text{C}_{20}\text{'-H}$ ,  $\text{C}_{22}\text{'-H}$ ), 1.29–1.25 (m, 11H, one of  $\text{C}_{19}\text{'-H}$ , one of  $\text{C}_{20}\text{'-H}$ ,  $\text{C}_6\text{'-H}$ ,  $\text{C}_{16}\text{'-CH}_3$ ,  $\text{C}_3\text{'-OC-CH}_3$ ), 0.91 (m, 1H,  $\text{C}_{11}\text{'-H}$ ), 0.82 (t, 3H,  $\text{C}_{23}\text{'-H}$ );  $^{13}\text{C}$  NMR (176 MHz,  $\text{CDCl}_3$ )  $\delta$ : 203.40, 172.61, 163.71, 149.26, 144.85, 129.50, 129.27, 124.20, 124.06, 115.34, 95.66, 82.18, 79.61, 78.54, 78.16, 75.64, 68.11, 67.94, 65.61, 60.98, 59.17, 50.26, 47.48, 46.95, 46.33, 43.57, 40.77, 39.53, 38.75, 38.11, 33.45, 31.82, 30.51, 28.05, 26.93, 24.68, 23.49, 17.83, 17.27, 15.75, 9.39; MS (MALDI) cal for  $\text{C}_{41}\text{H}_{59}\text{FO}_9$   $[\text{M}+\text{Na}]^+$  737.403532, found  $[\text{M}+\text{Na}]^+$  737.403716.

### Preparation of **7h**

Compound **5** (0.33 g, 0.54 mmol) and 1,4-di(2,2,2-trichloroacetimidatemethyl)benzene (0.26 g, 0.61 mmol) were dissolved in 15 mL dry  $\text{CH}_2\text{Cl}_2$  with some molecular sieve under Ar. Then  $\text{BF}_3\cdot(\text{C}_2\text{H}_5)_2\text{O}$  (0.13 mL, 1.02 mmol) was added at room temperature. The mixture was stirred for 20 h, then diluted with  $\text{CH}_2\text{Cl}_2$  (15 mL) and washed with saturated sodium bicarbonate solution ( $3 \times 10$  mL). The combined organic layers were dried with  $\text{Na}_2\text{SO}_4$  and evaporated under reduced pressure. The residue was purified by column chromatography on silica gel (200–300 mesh) to afford pure **7h** (0.32 g, yield 68%). TLC (ethyl acetate : petroleum ether = 1:2, v:v).  $^1\text{H}$  NMR (400 MHz,  $\text{CDCl}_3$ )  $\delta$ : 9.70(s, 1H, N-H), 7.28(m, 4H,  $\text{C}_3\text{'-H}$ ,  $\text{C}_4\text{'-H}$ ,  $\text{C}_6\text{'-H}$ ,  $\text{C}_7\text{'-H}$ ), 6.83(s, 1H,  $\text{C}_{13}\text{'-H}$ ), 4.83(s, 1H,  $\text{C}_1\text{'-H}$ ), 4.76(m, 1H,  $\text{C}_{21}\text{'-H}$ ), 4.59(s, 2H,  $\text{C}_{17}\text{'-H}$ ), 4.58(m, 2H,  $\text{C}_8\text{'-H}$ ), 4.17(m, 1H,  $\text{C}_9\text{'-H}$ ), 3.69(m, 1H,  $\text{C}_2\text{'-H}$ ), 3.62(m, 1H,  $\text{C}_{17}\text{'-H}$ ), 3.62–3.55(m, 5H,  $\text{C}_3\text{'-OCH}_2\text{-}$ ,  $\text{C}_4\text{'-OCH}_3$ ), 3.54(m, 1H,  $\text{C}_5\text{'-H}$ ), 3.53–3.52(m, 4H,  $\text{C}_4\text{'-H}$ ,  $\text{C}_2\text{'-OCH}_3$ ), 3.50–3.49(m, 3H,  $\text{C}_{16}\text{'-H}$ , one of  $\text{C}_2\text{'-H}$ ,  $\text{C}_3\text{'-H}$ ), 3.44(m, 1H,

C<sub>3</sub>'-H), 3.03(m, 1H, C<sub>4</sub>'-H), 2.89(m, 1H, C<sub>12</sub>-H), 2.77(m, 1H, C<sub>7</sub>-H), 2.55(m, 1H, one of C<sub>8</sub>-H), 2.31(dd, 1H, *J*=14Hz, one of C<sub>2</sub>-H), 2.21(m, 2H, C<sub>10</sub>-H), 1.77-1.49(m, 11H, C<sub>5</sub>-H, C<sub>6</sub>-H, one of C<sub>8</sub>-H, C<sub>18</sub>-H, one of C<sub>19</sub>-H, one of C<sub>20</sub>-H, C<sub>22</sub>-H), 1.23-1.21(m, 11H, one of C<sub>19</sub>-H, one of C<sub>20</sub>-H, C<sub>6</sub>'-H, C<sub>16</sub>-CH<sub>3</sub>, C<sub>3</sub>'-OC-CH<sub>3</sub>), 1.01(m, 1H, C<sub>11</sub>-H), 0.77(t, 3H, C<sub>23</sub>-H); <sup>13</sup>C NMR (176 MHz, CDCl<sub>3</sub>) δ: 202.70, 172.47, 171.10, 149.17, 144.73, 136.07, 135.62, 128.44, 128.00, 127.79, 127.35, 99.38, 95.76, 82.13, 79.63, 78.45, 78.33, 76.16, 75.69, 67.91, 65.61, 60.97, 60.34, 59.17, 58.96, 50.22, 47.01, 46.31, 43.49, 40.74, 39.55, 38.75, 38.11, 34.16, 33.36, 30.57, 27.99, 26.88, 24.64, 20.99, 17.80, 15.69, 14.16, 9.37; MS (MALDI) cal for C<sub>44</sub>H<sub>62</sub>Cl<sub>3</sub>NO<sub>10</sub> [M+Na]<sup>+</sup> 892.333151, found [M+ Na]<sup>+</sup> 892.333331.

### Preparation of **7i**

Compound **5** (0.38 g, 0.63 mmol) and 3-methoxybenzyl-2,2,2-trichloroacetimidate (0.21 g, 0.75 mmol) were dissolved in 15 mL dry CH<sub>2</sub>Cl<sub>2</sub> with some molecular sieve under Ar. Then BF<sub>3</sub>·(C<sub>2</sub>H<sub>5</sub>)<sub>2</sub>O (0.12 mL, 1.01 mmol) was added at room temperature. The mixture was stirred for 24 h, then diluted with CH<sub>2</sub>Cl<sub>2</sub> (15 mL) and washed with saturated sodium bicarbonate solution (3 × 10 mL). The combined organic layers were dried with Na<sub>2</sub>SO<sub>4</sub> and evaporated under reduced pressure. The residue was purified by column chromatography on silica gel (200–300 mesh) to afford pure **7i** (0.27 g, yield 59%). TLC (ethyl acetate : petroleum ether = 1:2, v:v). <sup>1</sup>H NMR (400 MHz, CDCl<sub>3</sub>) δ: 7.65 (m, 1H, C<sub>6</sub>'-H), 7.45 (m, 1H, C<sub>7</sub>'-H), 7.20-7.16 (m, 2H, C<sub>3</sub>'-H, C<sub>5</sub>'-H), 6.84 (s, 1H, C<sub>13</sub>-H), 5.21 (s, 2H, C<sub>1</sub>'-H), 4.73 (s, 1H, C<sub>1</sub>-H), 4.59 (m, 1H, C<sub>21</sub>-H), 4.14 (m, 1H, C<sub>9</sub>-H), 3.73 (s, 3H, C<sub>4</sub>'-OCH<sub>3</sub>), 3.71 (m, 1H, C<sub>2</sub>'-H), 3.65 (m, 1H, C<sub>17</sub>-H), 3.63-3.57 (m, 5H, C<sub>3</sub>'-OCH<sub>2</sub>-, C<sub>4</sub>'-OCH<sub>3</sub>), 3.55 (m, 1H, C<sub>5</sub>'-H), 3.52 (m, 1H, C<sub>4</sub>-H), 3.49 (s, 3H, C<sub>2</sub>'-OCH<sub>3</sub>), 3.46 (m, 1H, C<sub>3</sub>'-H), 3.42-3.40 (m, 3H, C<sub>16</sub>-H, one of C<sub>2</sub>-H, C<sub>3</sub>-H), 3.03 (m, 1H, C<sub>4</sub>'-H), 2.86 (m, 1H, C<sub>12</sub>-H), 2.51 (m, 1H, C<sub>7</sub>-H), 2.29 (m, 1H, one of C<sub>2</sub>-H), 2.18 (m, 2H, C<sub>10</sub>-H), 1.96 (m, 1H, one of C<sub>8</sub>-H), 1.78-1.42 (m, 11H, C<sub>5</sub>-H, C<sub>6</sub>-H, one of C<sub>8</sub>-H, C<sub>18</sub>-H, one of C<sub>19</sub>-H, one of C<sub>20</sub>-H, C<sub>22</sub>-H), 1.34-1.23 (m, 11H, one of C<sub>19</sub>-H, one of C<sub>20</sub>-H, C<sub>6</sub>'-H, C<sub>16</sub>-CH<sub>3</sub>, C<sub>3</sub>'-OC-CH<sub>3</sub>), 1.04 (m, 1H, C<sub>11</sub>-H), 0.90 (t, 3H, C<sub>23</sub>-H); <sup>13</sup>C NMR (101 MHz, CDCl<sub>3</sub>) δ 202.42, 171.57, 162.70, 148.20, 143.84, 139.12, 129.94, 119.07, 112.28, 112.12, 94.66, 81.17, 79.62, 78.60, 75.23,

74.62, 70.80, 66.93, 64.59, 59.95, 58.15, 54.18, 52.43, 49.25, 46.02, 45.32, 42.56, 39.76, 38.53, 37.74, 37.11, 32.43, 30.90, 29.54, 28.67, 27.03, 23.67, 21.67, 18.14, 16.83, 14.73, 8.37; MS (MALDI) cal for  $C_{42}H_{62}O_{10}$   $[M+Na]^+$  749.423519, found  $[M+Na]^+$  749.423777.

### Preparation of 7j

Compound **5** (0.36 g, 0.59 mmol) and D-cellobioseoctaacetate-2,2,2-trichloroacetimide (0.53 g, 0.68 mmol) were dissolved in 15 mL dry  $CH_2Cl_2$  with some molecular sieve under Ar. Then  $BF_3 \cdot (C_2H_5)_2O$  (0.13 mL, 1.02 mmol) was added at room temperature. The mixture was stirred for 12 h, then diluted with  $CH_2Cl_2$  (15 mL) and washed with saturated sodium bicarbonate solution ( $3 \times 10$  mL). The combined organic layers were dried with  $Na_2SO_4$  and evaporated under reduced pressure. The residue was purified by column chromatography on silica gel (200–300 mesh) to afford pure **7j** (0.47 g, yield 65%). TLC (ethyl acetate : petroleum ether = 1:2, v:v).  $^1H$  NMR (400 MHz,  $CDCl_3$ )  $\delta$ : 6.89 (s, 1H,  $C_{13}$ -H), 5.17 (m, 2H,  $C_{1''}$ -H,  $C_{6''}$ -H), 5.07 (m, 1H,  $C_{8''}$ -H), 4.92 (m, 2H,  $C_{2''}$ -H,  $C_{7''}$ -H), 4.80 (s, 1H,  $C_{1'}$ -H), 4.61-4.57 (m, 2H,  $C_{21}$ -H,  $C_{3''}$ -H), 4.39 (m, 1H,  $C_{9''}$ -H), 4.21 (m, 1H,  $C_9$ -H), 4.14-4.03 (m, 6H,  $C_{5''}$ -H,  $C_{10''}$ -H,  $C_{5''}$ -CH<sub>2</sub>-,  $C_{10''}$ -CH<sub>2</sub>-), 3.79 (m, 1H,  $C_{4''}$ -H), 3.71 (m, 1H,  $C_{2'}$ -H), 3.60 (m, 1H,  $C_{17}$ -H), 3.56-3.49 (m, 10H,  $C_{3'}$ -OCH<sub>2</sub>-,  $C_{4'}$ -OCH<sub>3</sub>,  $C_{5'}$ -H,  $C_4$ -H,  $C_{2'}$ -OCH<sub>3</sub>), 3.44 (m, 1H,  $C_{3'}$ -H), 3.12-3.07 (m, 3H,  $C_{16}$ -H, one of  $C_{2'}$ -H,  $C_3$ -H), 2.93 (m, 1H,  $C_{4'}$ -H), 2.81 (m, 1H,  $C_{12}$ -H), 2.35 (m, 1H, one of  $C_{2'}$ -H), 2.32 (m, 1H,  $C_7$ -H), 2.24 (m, 2H,  $C_{10}$ -H), 2.04-1.98 (m, 21H, -OAc $\times$ 5, -C-OAc $\times$ 2), 1.92 (m, 1H, one of  $C_8$ -H), 1.61-1.47 (m, 11H,  $C_5$ -H,  $C_6$ -H, one of  $C_8$ -H,  $C_{18}$ -H, one of  $C_{19}$ -H, one of  $C_{20}$ -H,  $C_{22}$ -H), 1.24-1.14 (m, 11H, one of  $C_{19}$ -H, one of  $C_{20}$ -H,  $C_6$ -H,  $C_{16}$ -CH<sub>3</sub>,  $C_{3'}$ -OC-CH<sub>3</sub>), 1.03 (m, 1H,  $C_{11}$ -H), 0.81 (t, 3H,  $C_{23}$ -H);  $^{13}C$  NMR (101 MHz,  $CDCl_3$ )  $\delta$  202.31, 172.20, 170.80, 170.25, 169.98, 169.64, 169.30, 169.10, 168.84, 149.55, 144.52, 101.42, 100.56, 95.69, 82.00, 79.53, 78.32, 76.42, 76.16, 75.52, 72.76, 72.57, 72.45, 71.91, 71.71, 71.45, 67.78, 65.34, 61.82, 61.43, 60.75, 60.13, 58.99, 50.00, 46.93, 46.29, 43.18, 40.71, 39.41, 38.63, 37.94, 33.85, 33.02, 30.16, 28.09, 26.82, 24.42, 21.95, 20.92, 20.81, 20.61, 20.53, 20.44, 20.33, 20.30, 17.67, 16.19, 15.59, 14.04, 9.26; MS (MALDI) cal for  $C_{60}H_{88}O_{26}$   $[M+Na]^+$  1247.545604, found  $[M+Na]^+$  1247.545361.

### Preparation of 7k

Compound **5** (0.34 g, 0.56 mmol) and  $\beta$ -D-ribofuranose-1,2,3,5-tetraacetate-2,2,2-trichloroacetimidate (0.26 g, 0.62 mmol) were dissolved in 15 mL dry  $\text{CH}_2\text{Cl}_2$  with some molecular sieve under Ar. Then  $\text{BF}_3 \cdot (\text{C}_2\text{H}_5)_2\text{O}$  (0.12 mL, 1.01 mmol) was added at room temperature. The mixture was stirred for 16 h, then diluted with  $\text{CH}_2\text{Cl}_2$  (15 mL) and washed with saturated sodium bicarbonate solution ( $3 \times 10$  mL). The combined organic layers were dried with  $\text{Na}_2\text{SO}_4$  and evaporated under reduced pressure. The residue was purified by column chromatography on silica gel (200–300 mesh) to afford pure **7k** (0.32 g, yield 67%). TLC (ethyl acetate : petroleum ether = 1:3, v:v).  $^1\text{H}$  NMR (400 MHz,  $\text{CDCl}_3$ )  $\delta$ : 6.80 (s, 1H,  $\text{C}_{13}\text{-H}$ ), 6.71 (m, 1H,  $\text{C}_{1''}\text{-H}$ ), 5.40-4.80 (m, 3H,  $\text{C}_2''\text{-H}$ ,  $\text{C}_3''\text{-H}$ ,  $\text{C}_4''\text{-H}$ ), 4.74 (s, 1H,  $\text{C}_{1'}\text{-H}$ ), 4.57 (m, 1H,  $\text{C}_{21}\text{-H}$ ), 4.33-4.02 (m, 4H,  $\text{C}_{1''}\text{-H}$ ,  $\text{C}_9\text{-H}$ ,  $\text{C}_4''\text{-CH}_2\text{-}$ ), 3.69-3.54 (m, 7H,  $\text{C}_2'\text{-H}$ ,  $\text{C}_{17}\text{-H}$ ,  $\text{C}_3'\text{-OCH}_2\text{-}$ ,  $\text{C}_4'\text{-OCH}_3$ ), 3.50-3.42 (m, 6H,  $\text{C}_5'\text{-H}$ ,  $\text{C}_4\text{-H}$ ,  $\text{C}_2'\text{-OCH}_3$ ,  $\text{C}_3'\text{-H}$ ), 3.08-2.99 (m, 3H,  $\text{C}_{16}\text{-H}$ , one of  $\text{C}_2\text{-H}$ ,  $\text{C}_3\text{-H}$ ), 2.86 (m, 1H,  $\text{C}_4'\text{-H}$ ), 2.74 (m, 1H,  $\text{C}_{12}\text{-H}$ ), 2.52 (m, 1H,  $\text{C}_7\text{-H}$ ), 2.28 (dd,  $J_1=6.6\text{Hz}$ ,  $J_2=1.4\text{Hz}$ , 1H, one of  $\text{C}_2\text{-H}$ ), 2.16 (m, 2H,  $\text{C}_{10}\text{-H}$ ), 2.04-1.97 (m, 6H,  $\text{C}_2''\text{-OAc}$ ,  $\text{C}_3''\text{-OAc}$ ), 1.74 (m, 3H,  $\text{C}_4''\text{-OAc}$ ), 1.66 (m, 1H, one of  $\text{C}_8\text{-H}$ ), 1.56-1.29 (m, 11H,  $\text{C}_5\text{-H}$ ,  $\text{C}_6\text{-H}$ , one of  $\text{C}_8\text{-H}$ ,  $\text{C}_{18}\text{-H}$ , one of  $\text{C}_{19}\text{-H}$ , one of  $\text{C}_{20}\text{-H}$ ,  $\text{C}_{22}\text{-H}$ ), 1.18-1.06 (m, 11H, one of  $\text{C}_{19}\text{-H}$ , one of  $\text{C}_{20}\text{-H}$ ,  $\text{C}_6'\text{-H}$ ,  $\text{C}_{16}\text{-CH}_3$ ,  $\text{C}_3'\text{-OC-CH}_3$ ), 0.96 (m, 1H,  $\text{C}_{11}\text{-H}$ ), 0.75 (t,  $J=7.6\text{Hz}$ , 3H,  $\text{C}_{23}\text{-H}$ );  $^{13}\text{C}$  NMR (101 MHz,  $\text{CDCl}_3$ )  $\delta$  201.73, 171.51, 170.14, 169.53, 168.75, 148.16, 143.78, 98.40, 94.79, 81.29, 81.18, 80.99, 78.66, 77.50, 75.19, 74.72, 67.49, 66.95, 64.66, 64.58, 59.98, 59.38, 58.20, 49.26, 48.16, 46.05, 45.34, 42.53, 39.78, 38.59, 37.79, 33.20, 32.40, 29.62, 27.03, 25.92, 23.67, 20.03, 19.85, 19.70, 19.59, 16.83, 14.75, 14.71, 8.39; MS (MALDI) cal for  $\text{C}_{45}\text{H}_{68}\text{O}_{16}$   $[\text{M}+\text{Na}]^+$  887.439947, found  $[\text{M}+\text{Na}]^+$  887.440211.

### Preparation of 7l

Compound **5** (0.33 g, 0.54 mmol) and  $\beta$ -D-glucosepentaacetate-2,2,2-trichloroacetimidate (0.28 g, 0.45 mmol) were dissolved in 15 mL dry  $\text{CH}_2\text{Cl}_2$  with some molecular sieve under Ar. Then  $\text{BF}_3 \cdot (\text{C}_2\text{H}_5)_2\text{O}$  (0.14 mL, 1.03 mmol) was added at room temperature. The mixture was stirred for 18 h, then diluted with  $\text{CH}_2\text{Cl}_2$  (15 mL) and washed with saturated sodium bicarbonate solution ( $3 \times 10$  mL). The combined

organic layers were dried with Na<sub>2</sub>SO<sub>4</sub> and evaporated under reduced pressure. The residue was purified by column chromatography on silica gel (200–300 mesh) to afford pure **7l** (0.32 g, yield 63%). TLC (ethyl acetate : petroleum ether = 1:2, v:v). <sup>1</sup>H NMR (400 MHz, CDCl<sub>3</sub>) δ: 6.82 (s, 1H, C<sub>13</sub>-H), 5.26 (m, 4H, C<sub>1</sub>'-H, C<sub>2</sub>'-H, C<sub>3</sub>'-H, C<sub>4</sub>'-H), 4.92 (m, 1H, C<sub>5</sub>'-H), 4.73 (s, 1H, C<sub>1</sub>'-H), 4.59 (m, 1H, C<sub>21</sub>-H), 4.15 (m, 1H, C<sub>9</sub>-H), 3.65 (m, 1H, C<sub>2</sub>'-H), 3.55 (m, 1H, C<sub>17</sub>-H), 3.53-3.36 (m, 11H, C<sub>3</sub>'-OCH<sub>2</sub>-, C<sub>4</sub>'-OCH<sub>3</sub>, C<sub>5</sub>'-H, C<sub>4</sub>-H, C<sub>2</sub>'-OCH<sub>3</sub>, C<sub>3</sub>'-H), 3.29 (m, 1H, one of C<sub>2</sub>-H), 3.08-3.00 (m, 2H, C<sub>16</sub>-H, C<sub>3</sub>-H), 2.88 (m, 1H, C<sub>4</sub>'-H), 2.75 (m, 1H, C<sub>12</sub>-H), 2.50 (m, 1H, C<sub>7</sub>-H), 2.36-2.12 (m, 3H, one of C<sub>2</sub>-H, C<sub>10</sub>-H), 2.03-1.27 (m, 23H, one of C<sub>8</sub>-H, one of C<sub>19</sub>-H, one of C<sub>20</sub>-H, C<sub>6</sub>'-H, C<sub>16</sub>-CH<sub>3</sub>, C<sub>3</sub>'-OC-CH<sub>3</sub>, C<sub>5</sub>-H, C<sub>6</sub>-H, one of C<sub>8</sub>-H, C<sub>18</sub>-H, one of C<sub>19</sub>-H, one of C<sub>20</sub>-H, C<sub>22</sub>-H), 1.04 (d, 2H, *J*=6.8 Hz, C<sub>1</sub>'-CH<sub>2</sub>-), 0.95 (m, 1H, C<sub>11</sub>-H), 0.74 (t, 3H, *J*=7.6 Hz, C<sub>23</sub>-H); <sup>13</sup>C NMR (101 MHz, CDCl<sub>3</sub>) δ 201.54, 172.40, 170.99, 170.48, 163.49, 149.30, 145.01, 95.78, 95.71, 82.10, 79.57, 78.40, 78.36, 76.33, 75.75, 75.58, 74.86, 74.68, 67.83, 65.44, 60.85, 60.26, 59.05, 53.46, 50.04, 46.42, 45.57, 43.19, 40.90, 39.47, 38.70, 37.96, 32.86, 32.45, 29.89, 28.15, 26.88, 24.42, 21.46, 20.92, 20.91, 20.59, 20.40, 17.73, 15.95, 15.65, 14.10, 9.29; MS (MALDI) cal for C<sub>48</sub>H<sub>72</sub>O<sub>18</sub> [M+Na]<sup>+</sup> 959.461086, found [M+ Na]<sup>+</sup> 959.461240.

### Preparation of **8b**

Compound **5** (0.36 g, 0.59 mmol), propionyl chloride (0.05 g, 0.64 mmol) and 4-dimethylaminopyridine (DMAP, 0.17 g, 1.39 mmol) were added to 15 mL CH<sub>2</sub>Cl<sub>2</sub> under Ar, then the mixture was heated to reflux. After about 8 h, the mixture was diluted with CH<sub>2</sub>Cl<sub>2</sub> (15 mL) and washed with saturated sodium bicarbonate solution (3 × 10 mL). The combined organic layers were dried with Na<sub>2</sub>SO<sub>4</sub> and evaporated under reduced pressure. The residue was purified by column chromatography on silica gel (200–300 mesh) to afford pure **8b** (0.34 g, yield 87%). TLC (ethyl acetate : petroleum ether = 1:3, v:v). <sup>1</sup>H NMR (400 MHz, CDCl<sub>3</sub>) δ: 6.75 (s, 1H, C<sub>13</sub>-H), 4.86 (s, 1H, C<sub>1</sub>'-H), 4.67 (m, 1H, C<sub>21</sub>-H), 4.51 (m, 1H, C<sub>9</sub>-H), 4.07 (m, 1H, C<sub>2</sub>'-H), 3.58 (m, 1H, C<sub>17</sub>-H), 3.50-3.31 (m, 11H, C<sub>3</sub>'-OCH<sub>2</sub>-, C<sub>4</sub>'-OCH<sub>3</sub>, C<sub>5</sub>'-H, C<sub>4</sub>-H, C<sub>2</sub>'-OCH<sub>3</sub>, C<sub>3</sub>'-H), 3.24 (m, 1H, C<sub>16</sub>-H), 3.00-2.95 (m, 2H, one of C<sub>2</sub>-H, C<sub>3</sub>-H), 2.81 (m, 1H, C<sub>4</sub>'-H), 2.68 (m, 1H, C<sub>12</sub>-H), 2.44 (m, 1H, one of C<sub>2</sub>-H), 2.25-2.14 (m, 4H, C<sub>7</sub>-H, C<sub>10</sub>-H, one of

C<sub>8</sub>-H), 1.68-1.32 (m, 11H, C<sub>5</sub>-H, C<sub>6</sub>-H, one of C<sub>8</sub>-H, C<sub>18</sub>-H, one of C<sub>19</sub>-H, one of C<sub>20</sub>-H, C<sub>22</sub>-H), 1.13-0.96 (m, 17H, one of C<sub>19</sub>-H, one of C<sub>20</sub>-H, C<sub>6</sub>'-H, C<sub>16</sub>-CH<sub>3</sub>, C<sub>3</sub>'-OC-CH<sub>3</sub>, C<sub>11</sub>-H, C<sub>2</sub>'-H, C<sub>3</sub>'-H), 0.67 (t,  $J=7.4\text{Hz}$ , 3H, C<sub>23</sub>-H); <sup>13</sup>C NMR (101 MHz, CDCl<sub>3</sub>)  $\delta$  201.41, 173.70, 172.34, 149.05, 145.00, 95.73, 82.07, 79.55, 78.37, 75.59, 74.53, 67.80, 65.37, 60.75, 58.97, 50.02, 47.74, 46.35, 45.54, 43.20, 40.83, 39.44, 38.66, 37.95, 32.82, 32.47, 29.93, 28.07, 27.56, 27.03, 24.40, 21.37, 17.65, 15.94, 15.57, 9.22, 8.81; MS (MALDI) cal for C<sub>37</sub>H<sub>58</sub>O<sub>10</sub> [M+Na]<sup>+</sup> 685.392219, found [M+ Na]<sup>+</sup> 685.392352.

### Preparation of 8c

Compound **5** (0.36 g, 0.59 mmol), 2-thiophenoyl chloride (0.11 g, 0.75 mmol) and DMAP (0.17 g, 1.39 mmol) were added to 15 mL CH<sub>2</sub>Cl<sub>2</sub> under Ar, then the mixture was heated to reflux. After about 11 h, the mixture was diluted with CH<sub>2</sub>Cl<sub>2</sub> (15 mL) and washed with saturated sodium bicarbonate solution (3 × 10 mL). The combined organic layers were dried with Na<sub>2</sub>SO<sub>4</sub> and evaporated under reduced pressure. The residue was purified by column chromatography on silica gel (200–300 mesh) to afford pure **8c** (0.31 g, yield 74%). TLC (ethyl acetate : petroleum ether = 1:4, v:v). <sup>1</sup>H NMR (400 MHz, CDCl<sub>3</sub>)  $\delta$ : 7.74 (d, 1H, C<sub>3</sub>'-H), 7.50 (d, 1H, C<sub>5</sub>'-H), 7.04 (m, 1H, C<sub>4</sub>'-H), 6.86 (s, 1H, C<sub>13</sub>-H), 4.74 (s, 1H, C<sub>1</sub>'-H), 4.61 (m, 1H, C<sub>21</sub>-H), 4.14 (m, 1H, C<sub>9</sub>-H), 3.65 (m, 1H, C<sub>2</sub>'-H), 3.55 (m, 1H, C<sub>17</sub>-H), 3.50-3.48 (m, 6H, C<sub>3</sub>'-OCH<sub>2</sub>-, C<sub>4</sub>'-OCH<sub>3</sub>, C<sub>5</sub>'-H), 3.44-3.38 (m, 8H, C<sub>4</sub>-H, C<sub>2</sub>'-OCH<sub>3</sub>, C<sub>3</sub>'-H, C<sub>16</sub>-H, one of C<sub>2</sub>-H, C<sub>3</sub>-H), 3.08 (m, 1H, C<sub>4</sub>'-H), 2.77 (m, 1H, C<sub>12</sub>-H), 2.51 (m, 1H, C<sub>7</sub>-H), 2.31 (s, 1H, one of C<sub>2</sub>-H), 2.21 (m, 2H, C<sub>10</sub>-H), 1.89 (m, 1H, one of C<sub>8</sub>-H), 1.65-1.39 (m, 11H, C<sub>5</sub>-H, C<sub>6</sub>-H, one of C<sub>8</sub>-H, C<sub>18</sub>-H, one of C<sub>19</sub>-H, one of C<sub>20</sub>-H, C<sub>22</sub>-H), 1.23-1.17 (m, 11H, one of C<sub>19</sub>-H, one of C<sub>20</sub>-H, C<sub>6</sub>'-H, C<sub>16</sub>-CH<sub>3</sub>, C<sub>3</sub>'-OC-CH<sub>3</sub>), 0.97 (m, 1H, C<sub>11</sub>-H), 0.74 (t, 3H, C<sub>23</sub>-H); <sup>13</sup>C NMR (101 MHz, CDCl<sub>3</sub>)  $\delta$ : 201.34, 172.43, 161.63, 149.33, 145.02, 133.78, 133.35, 132.36, 127.75, 95.85, 82.17, 79.62, 78.46, 76.32, 75.72, 67.89, 65.46, 60.86, 59.08, 50.13, 47.85, 46.41, 45.81, 43.33, 40.90, 39.53, 38.74, 38.06, 32.94, 32.58, 30.02, 28.13, 26.91, 24.50, 21.43, 17.76, 16.15, 15.67, 9.32; MS (MALDI) cal for C<sub>39</sub>H<sub>56</sub>O<sub>10</sub>S [M+Na]<sup>+</sup> 739.348640, found [M+ Na]<sup>+</sup> 739.348619.

### Preparation of **8d**

Compound **5** (0.34 g, 0.56 mmol), 3-fluorobenzoyl chloride (0.09 g, 0.57 mmol) and DMAP (0.09 g, 0.74 mmol) were added to 15 mL CH<sub>2</sub>Cl<sub>2</sub> under Ar, then the mixture was heated to reflux. After about 5 h, the mixture was diluted with CH<sub>2</sub>Cl<sub>2</sub> (15 mL) and washed with saturated sodium bicarbonate solution (3 × 10 mL). The combined organic layers were dried with Na<sub>2</sub>SO<sub>4</sub> and evaporated under reduced pressure. The residue was purified by column chromatography on silica gel (200–300 mesh) to afford pure **8d** (0.34 g, yield 83%). TLC (ethyl acetate : petroleum ether = 1:3, v:v). <sup>1</sup>H NMR (400 MHz, CDCl<sub>3</sub>) δ: 7.79-7.17 (d, 4H, C<sub>3'</sub>-H, C<sub>4'</sub>-H, C<sub>6'</sub>-H, C<sub>7'</sub>-H), 6.85 (s, 1H, C<sub>13</sub>-H), 4.76 (s, 1H, C<sub>1'</sub>-H), 4.61 (m, 1H, C<sub>21</sub>-H), 4.14 (m, 1H, C<sub>9</sub>-H), 4.02 (m, 1H, C<sub>2'</sub>-H), 3.64 (m, 1H, C<sub>17</sub>-H), 3.56-3.49 (m, 7H, C<sub>3'</sub>-OCH<sub>2</sub>-, C<sub>4'</sub>-OCH<sub>3</sub>, C<sub>5'</sub>-H, C<sub>4</sub>-H), 3.43-3.40 (m, 4H, C<sub>2</sub>-OCH<sub>3</sub>, C<sub>3'</sub>-H), 3.11-3.05 (m, 3H, C<sub>16</sub>-H, one of C<sub>2</sub>-H, C<sub>3</sub>-H), 2.89 (m, 1H, C<sub>4'</sub>-H), 2.77 (m, 1H, C<sub>12</sub>-H), 2.50 (s, 1H, one of C<sub>2</sub>-H), 2.31 (m, 1H, C<sub>7</sub>-H), 2.19 (m, 2H, C<sub>10</sub>-H), 1.95 (m, 1H, one of C<sub>8</sub>-H), 1.73-1.38 (m, 11H, C<sub>5</sub>-H, C<sub>6</sub>-H, one of C<sub>8</sub>-H, C<sub>18</sub>-H, one of C<sub>19</sub>-H, one of C<sub>20</sub>-H, C<sub>22</sub>-H), 1.24-1.16 (m, 11H, one of C<sub>19</sub>-H, one of C<sub>20</sub>-H, C<sub>6'</sub>-H, C<sub>16</sub>-CH<sub>3</sub>, C<sub>3'</sub>-OC-CH<sub>3</sub>), 0.94 (m, 1H, C<sub>11</sub>-H), 0.73 (t, 3H, C<sub>23</sub>-H); <sup>13</sup>C NMR (101 MHz, CDCl<sub>3</sub>) δ: 201.32, 172.49, 168.92, 163.65, 149.43, 145.00, 130.04, 129.96, 125.72, 116.83, 116.61, 95.74, 82.22, 79.54, 78.45, 76.02, 75.72, 67.85, 65.48, 60.80, 58.98, 50.13, 47.82, 46.38, 45.75, 43.31, 40.88, 39.52, 38.69, 38.00, 34.85, 32.56, 30.01, 28.09, 26.87, 24.45, 21.39, 17.66, 16.14, 15.56, 9.25; MS (MALDI) cal for C<sub>41</sub>H<sub>57</sub>FO<sub>10</sub> [M+Na]<sup>+</sup> 751.382797, found [M+ Na]<sup>+</sup> 751.382804.

### Preparation of **8e**

Compound **5** (0.38 g, 0.63 mmol), 2,4-difluorobenzoyl chloride (0.15 g, 0.85 mmol) and DMAP (0.18 g, 1.47 mmol) were added to 15 mL CH<sub>2</sub>Cl<sub>2</sub> under Ar, then the mixture was heated to reflux. After about 4 h, the mixture was diluted with CH<sub>2</sub>Cl<sub>2</sub> (15 mL) and washed with saturated sodium bicarbonate solution (3 × 10 mL). The combined organic layers were dried with Na<sub>2</sub>SO<sub>4</sub> and evaporated under reduced pressure. The residue was purified by column chromatography on silica gel (200–300 mesh) to afford pure **8e** (0.41 g, yield 87%). TLC (ethyl acetate : petroleum ether =



1:4, v:v).  $^1\text{H}$  NMR (400 MHz,  $\text{CDCl}_3$ )  $\delta$ : 7.92 (m, 1H,  $\text{C}_7\text{'-H}$ ), 6.86-6.76 (m, 3H,  $\text{C}_4\text{'-H}$ ,  $\text{C}_6\text{'-H}$ ,  $\text{C}_{13}\text{'-H}$ ), 4.74 (s, 1H,  $\text{C}_{1\text{'-H}}$ ), 4.61 (m, 1H,  $\text{C}_{21}\text{'-H}$ ), 4.14 (m, 1H,  $\text{C}_9\text{'-H}$ ), 3.65-3.24 (m, 13H,  $\text{C}_2\text{'-H}$ ,  $\text{C}_{17}\text{'-H}$ ,  $\text{C}_3\text{'-OCH}_2\text{'-}$ ,  $\text{C}_4\text{'-OCH}_3$ ,  $\text{C}_5\text{'-H}$ ,  $\text{C}_4\text{'-H}$ ,  $\text{C}_2\text{'-OCH}_3$ ,  $\text{C}_3\text{'-H}$ ), 3.10-2.90 (m, 3H,  $\text{C}_{16}\text{'-H}$ , one of  $\text{C}_2\text{'-H}$ ,  $\text{C}_3\text{'-H}$ ), 2.76 (m, 1H,  $\text{C}_4\text{'-H}$ ), 2.51 (s, 1H, one of  $\text{C}_2\text{'-H}$ ), 2.35-1.93 (m, 3H,  $\text{C}_7\text{'-H}$ ,  $\text{C}_{10}\text{'-H}$ ), 1.77-1.44 (m, 13H,  $\text{C}_{12}\text{'-H}$ , one of  $\text{C}_8\text{'-H}$ ,  $\text{C}_5\text{'-H}$ ,  $\text{C}_6\text{'-H}$ , one of  $\text{C}_8\text{'-H}$ ,  $\text{C}_{18}\text{'-H}$ , one of  $\text{C}_{19}\text{'-H}$ , one of  $\text{C}_{20}\text{'-H}$ ,  $\text{C}_{22}\text{'-H}$ ), 1.19-1.13 (m, 11H, one of  $\text{C}_{19}\text{'-H}$ , one of  $\text{C}_{20}\text{'-H}$ ,  $\text{C}_6\text{'-H}$ ,  $\text{C}_{16}\text{'-CH}_3$ ,  $\text{C}_3\text{'-OC-CH}_3$ ), 0.95 (m, 1H,  $\text{C}_{11}\text{'-H}$ ), 0.74 (m, 3H,  $\text{C}_{23}\text{'-H}$ );  $^{13}\text{C}$  NMR (101 MHz,  $\text{CDCl}_3$ )  $\delta$  201.45, 172.53, 166.87, 163.16, 161.51, 149.44, 144.97, 134.02, 133.91, 111.68, 105.22, 95.80, 82.18, 79.65, 78.47, 76.43, 75.66, 67.92, 65.53, 60.96, 59.15, 50.16, 46.49, 45.71, 43.33, 40.92, 39.57, 38.76, 38.07, 33.02, 32.71, 30.12, 28.16, 26.94, 24.53, 21.32, 20.64, 17.79, 16.43, 15.71, 9.37; MS (MALDI) cal for  $\text{C}_{41}\text{H}_{56}\text{F}_2\text{O}_{10}$   $[\text{M}+\text{Na}]^+$  769.373375, found  $[\text{M}+\text{Na}]^+$  769.373368.

### Preparation of 8f

Compound **5** (0.51 g, 0.84 mmol), 4-nitrobenzoyl chloride (0.21 g, 1.13 mmol) and DMAP (0.19 g, 1.56 mmol) were added to 15 mL  $\text{CH}_2\text{Cl}_2$  under Ar, then the mixture was heated to reflux. After about 2 h, the mixture was diluted with  $\text{CH}_2\text{Cl}_2$  (15 mL) and washed with saturated sodium bicarbonate solution ( $3 \times 10$  mL). The combined organic layers were dried with  $\text{Na}_2\text{SO}_4$  and evaporated under reduced pressure. The residue was purified by column chromatography on silica gel (200–300 mesh) to afford pure **8f** (0.56 g, yield 89%). TLC (ethyl acetate : petroleum ether = 1:3, v:v).  $^1\text{H}$  NMR (400 MHz,  $\text{CDCl}_3$ )  $\delta$ : 8.32-8.24 (m, 4H,  $\text{C}_3\text{'-H}$ ,  $\text{C}_4\text{'-H}$ ,  $\text{C}_6\text{'-H}$ ,  $\text{C}_7\text{'-H}$ ), 6.97 (s, 1H,  $\text{C}_{13}\text{'-H}$ ), 4.83 (s, 1H,  $\text{C}_{1\text{'-H}}$ ), 4.72 (m, 1H,  $\text{C}_{21}\text{'-H}$ ), 4.24 (m, 1H,  $\text{C}_9\text{'-H}$ ), 3.74-3.47 (m, 13H,  $\text{C}_2\text{'-H}$ ,  $\text{C}_{17}\text{'-H}$ ,  $\text{C}_3\text{'-OCH}_2\text{'-}$ ,  $\text{C}_4\text{'-OCH}_3$ ,  $\text{C}_5\text{'-H}$ ,  $\text{C}_4\text{'-H}$ ,  $\text{C}_2\text{'-OCH}_3$ ,  $\text{C}_3\text{'-H}$ ), 3.20-3.00 (m, 3H,  $\text{C}_{16}\text{'-H}$ , one of  $\text{C}_2\text{'-H}$ ,  $\text{C}_3\text{'-H}$ ), 2.89 (m, 1H,  $\text{C}_4\text{'-H}$ ), 2.61 (m, 1H,  $\text{C}_{12}\text{'-H}$ ), 2.42-2.21 (m, 3H, one of  $\text{C}_2\text{'-H}$ ,  $\text{C}_{10}\text{'-H}$ ), 1.89-1.49 (m, 13H,  $\text{C}_7\text{'-H}$ ,  $\text{C}_8\text{'-H}$ ,  $\text{C}_5\text{'-H}$ ,  $\text{C}_6\text{'-H}$ ,  $\text{C}_{18}\text{'-H}$ , one of  $\text{C}_{19}\text{'-H}$ , one of  $\text{C}_{20}\text{'-H}$ ,  $\text{C}_{22}\text{'-H}$ ), 1.27-1.20 (m, 11H, one of  $\text{C}_{19}\text{'-H}$ , one of  $\text{C}_{20}\text{'-H}$ ,  $\text{C}_6\text{'-H}$ ,  $\text{C}_{16}\text{'-CH}_3$ ,  $\text{C}_3\text{'-OC-CH}_3$ ), 1.08 (m, 1H,  $\text{C}_{11}\text{'-H}$ ), 0.83 (t,  $J=7.2$  Hz, 3H,  $\text{C}_{23}\text{'-H}$ );  $^{13}\text{C}$  NMR (101 MHz,  $\text{CDCl}_3$ )  $\delta$  200.99, 172.36, 164.03, 150.48, 149.48, 144.99, 135.58, 130.65, 123.50, 95.78, 82.11, 79.65, 78.40, 76.77, 76.20, 75.55, 67.86,

65.44, 60.89, 59.10, 50.14, 46.45, 45.65, 43.26, 40.90, 39.51, 38.73, 38.01, 32.85, 32.52, 30.04, 28.15, 26.91, 24.47, 22.59, 21.44, 20.61, 17.77, 16.20, 15.69, 9.35; MS (MALDI) cal for  $C_{41}H_{57}NO_{12}$   $[M+Na]^+$  778.377297, found  $[M+Na]^+$  778.377181.

### Preparation of 8g

Compound **5** (0.38 g, 0.63 mmol), 3-methylbenzoyl chloride (0.13 g, 0.84 mmol) and DMAP (0.14 g, 1.14 mmol) were added to 15 mL  $CH_2Cl_2$  under Ar, then the mixture was heated to reflux. After about 9 h, the mixture was diluted with  $CH_2Cl_2$  (15 mL) and washed with saturated sodium bicarbonate solution ( $3 \times 10$  mL). The combined organic layers were dried with  $Na_2SO_4$  and evaporated under reduced pressure. The residue was purified by column chromatography on silica gel (200–300 mesh) to afford pure **8g** (0.37 g, yield 81%). TLC (ethyl acetate : petroleum ether = 1:3, v:v).  $^1H$  NMR (400 MHz,  $CDCl_3$ )  $\delta$ : 7.84 (d, 1H,  $C_{7''}$ -H); 7.79 (s, 1H,  $C_{3''}$ -H), 7.30-7.25 (m, 2H,  $C_{5''}$ -H,  $C_{6''}$ -H), 6.84 (s, 1H,  $C_{13}$ -H), 4.74 (s, 1H,  $C_{1'}$ -H), 4.61 (m, 1H,  $C_{21}$ -H), 4.13 (m, 1H,  $C_9$ -H), 3.65 (m, 1H,  $C_{17}$ -H), 3.57-3.38 (m, 12H,  $C_{2'}$ -H,  $C_{3'}$ -OCH<sub>2</sub>-,  $C_{4'}$ -OCH<sub>3</sub>,  $C_{5'}$ -H,  $C_4$ -H,  $C_{2'}$ -OCH<sub>3</sub>,  $C_{3'}$ -H), 3.12-3.03 (m, 2H,  $C_{16}$ -H, one of  $C_2$ -H), 2.90 (m, 1H,  $C_4$ -H), 2.78 (m, 1H,  $C_{12}$ -H), 2.50 (m, 1H, one of  $C_2$ -H), 2.33-2.28 (m, 6H,  $C_7$ -H,  $C_3$ -H,  $C_4$ -CH<sub>3</sub>, one of  $C_8$ -H), 2.17 (m, 2H,  $C_{10}$ -H), 1.78-1.40 (m, 11H,  $C_5$ -H,  $C_6$ -H, one of  $C_8$ -H,  $C_{18}$ -H, one of  $C_{19}$ -H, one of  $C_{20}$ -H,  $C_{22}$ -H), 1.20-1.10 (m, 11H, one of  $C_{19}$ -H, one of  $C_{20}$ -H,  $C_6$ -H,  $C_{16}$ -CH<sub>3</sub>,  $C_{3'}$ -OC-CH<sub>3</sub>), 0.94 (m, 1H,  $C_{11}$ -H), 0.74 (t,  $J=7.2$  Hz, 3H,  $C_{23}$ -H);  $^{13}C$  NMR (101 MHz,  $CDCl_3$ )  $\delta$  200.63, 171.60, 165.18, 148.33, 144.15, 137.16, 132.70, 129.61, 129.11, 127.29, 126.26, 125.73, 94.80, 81.22, 78.66, 77.49, 74.68, 74.44, 66.94, 64.56, 60.00, 58.17, 49.16, 45.50, 44.92, 42.35, 39.96, 38.56, 37.79, 37.08, 32.00, 31.68, 29.07, 27.22, 25.96, 23.54, 20.56, 20.25, 16.82, 15.26, 14.74, 8.41; MS (MALDI) cal for  $C_{42}H_{60}O_{10}$   $[M+Na]^+$  747.407896, found  $[M+Na]^+$  747.407790.

### Preparation of 8h

Compound **5** (0.34 g, 0.56 mmol), 4-cyanobenzoyl chloride (0.12 g, 0.72 mmol) and DMAP (0.15 g, 1.23 mmol) were added to 15 mL  $CH_2Cl_2$  under Ar, then the mixture was heated to reflux. After about 2 h, the mixture was diluted with  $CH_2Cl_2$  (15 mL) and washed with saturated sodium bicarbonate solution ( $3 \times 10$  mL). The combined

organic layers were dried with Na<sub>2</sub>SO<sub>4</sub> and evaporated under reduced pressure. The residue was purified by column chromatography on silica gel (200–300 mesh) to afford pure **8h** (0.37 g, yield 90%). TLC (ethyl acetate : petroleum ether = 2:5, v:v). <sup>1</sup>H NMR (400 MHz, CDCl<sub>3</sub>) δ: 8.18 (d, 2H, C<sub>3'</sub>-H, C<sub>7'</sub>-H), 7.79 (d, 2H, C<sub>4'</sub>-H, C<sub>6'</sub>-H), 6.95 (s, 1H, C<sub>13</sub>-H), 4.83 (s, 1H, C<sub>1</sub>-H), 4.71 (m, 1H, C<sub>21</sub>-H), 4.24 (m, 1H, C<sub>9</sub>-H), 3.75-3.47 (m, 13H, C<sub>2</sub>-H, C<sub>17</sub>-H, C<sub>3</sub>-OCH<sub>2</sub>-, C<sub>4</sub>-OCH<sub>3</sub>, C<sub>5</sub>-H, C<sub>4</sub>-H), 3.43-3.40 (m, 4H, C<sub>2</sub>-OCH<sub>3</sub>, C<sub>3</sub>-H), 3.20-3.10 (m, 2H, C<sub>16</sub>-H, one of C<sub>2</sub>-H), 2.99 (m, 1H, C<sub>3</sub>-H), 2.88 (m, 1H, C<sub>4</sub>-H), 2.59 (m, 1H, C<sub>12</sub>-H), 2.48-2.04 (m, 4H, one of C<sub>2</sub>-H, C<sub>7</sub>-H, C<sub>10</sub>-H), 1.84-1.50 (m, 12H, one of C<sub>8</sub>-H, C<sub>5</sub>-H, C<sub>6</sub>-H, one of C<sub>8</sub>-H, C<sub>18</sub>-H, one of C<sub>19</sub>-H, one of C<sub>20</sub>-H, C<sub>22</sub>-H), 1.28-1.19 (m, 11H, one of C<sub>19</sub>-H, one of C<sub>20</sub>-H, C<sub>6</sub>-H, C<sub>16</sub>-CH<sub>3</sub>, C<sub>3</sub>-OC-CH<sub>3</sub>), 1.05 (m, 1H, C<sub>11</sub>-H), 0.83 (t, *J*=7.6 Hz, 3H, C<sub>23</sub>-H); <sup>13</sup>C NMR (101 MHz, CDCl<sub>3</sub>) δ 201.00, 172.33, 164.26, 149.41, 144.99, 134.01, 132.20, 130.05, 117.80, 116.36, 95.87, 95.79, 82.10, 79.66, 78.39, 76.56, 76.18, 75.55, 67.85, 65.42, 60.88, 59.09, 50.12, 46.43, 45.65, 43.25, 40.90, 39.49, 38.73, 32.51, 31.81, 30.03, 28.14, 26.90, 24.46, 22.58, 21.44, 17.77, 16.18, 15.69, 14.05, 9.35; MS (MALDI) cal for C<sub>42</sub>H<sub>57</sub>NO<sub>10</sub> [M+Na]<sup>+</sup> 758.387468, found [M+ Na]<sup>+</sup> 758.387492.

### Preparation of **8i**

Compound **5** (0.41 g, 0.68 mmol), 4-methoxybenzoyl chloride (0.15 g, 0.88 mmol) and DMAP (0.16 g, 1.31 mmol) were added to 15 mL CH<sub>2</sub>Cl<sub>2</sub> under Ar, then the mixture was heated to reflux. After about 8 h, the mixture was diluted with CH<sub>2</sub>Cl<sub>2</sub> (15 mL) and washed with saturated sodium bicarbonate solution (3 × 10 mL). The combined organic layers were dried with Na<sub>2</sub>SO<sub>4</sub> and evaporated under reduced pressure. The residue was purified by column chromatography on silica gel (200–300 mesh) to afford pure **8i** (0.40 g, yield 79%). TLC (ethyl acetate : petroleum ether = 1:3, v:v). <sup>1</sup>H NMR (400 MHz, CDCl<sub>3</sub>) δ: 8.01 (d, 2H, C<sub>3'</sub>-H, C<sub>7'</sub>-H), 6.94-6.92 (m, 3H, C<sub>4'</sub>-H, C<sub>6'</sub>-H, C<sub>13</sub>-H), 4.82 (s, 1H, C<sub>1</sub>-H), 4.70 (m, 1H, C<sub>21</sub>-H), 4.23 (m, 1H, C<sub>9</sub>-H), 3.86 (s, 3H, C<sub>5</sub>-OCH<sub>3</sub>), 3.75-3.46 (m, 13H, C<sub>2</sub>-H, C<sub>17</sub>-H, C<sub>3</sub>-OCH<sub>2</sub>-, C<sub>4</sub>-OCH<sub>3</sub>, C<sub>5</sub>-H, C<sub>4</sub>-H, C<sub>2</sub>-OCH<sub>3</sub>, C<sub>3</sub>-H), 3.21-2.98 (m, 3H, C<sub>16</sub>-H, one of C<sub>2</sub>-H, C<sub>3</sub>-H), 2.87 (m, 1H, C<sub>4</sub>-H), 2.58 (m, 1H, C<sub>12</sub>-H), 2.42-2.16 (m, 3H, one of C<sub>2</sub>-H, C<sub>7</sub>-H, one of C<sub>10</sub>-H), 1.87-1.42 (m, 13H, one of C<sub>10</sub>-H, one of C<sub>8</sub>-H, C<sub>5</sub>-H, C<sub>6</sub>-H, one of C<sub>8</sub>-H, C<sub>18</sub>-H, one

of C<sub>19</sub>-H, one of C<sub>20</sub>-H, C<sub>22</sub>-H), 1.28-1.17 (m, 11H, one of C<sub>19</sub>-H, one of C<sub>20</sub>-H, C<sub>6</sub>'-H, C<sub>16</sub>-CH<sub>3</sub>, C<sub>3</sub>'-OC-CH<sub>3</sub>), 1.06 (m, 1H, C<sub>11</sub>-H), 0.82 (t,  $J=7.6\text{Hz}$ , 3H, C<sub>23</sub>-H); <sup>13</sup>C NMR (101 MHz, CDCl<sub>3</sub>)  $\delta$  201.56, 172.46, 165.67, 163.35, 149.15, 145.13, 131.54, 122.63, 113.59, 95.80, 82.14, 79.67, 78.44, 76.36, 75.63, 75.04, 67.89, 65.47, 60.92, 59.13, 55.36, 53.46, 50.12, 46.45, 45.92, 43.31, 40.92, 39.52, 38.76, 38.04, 32.92, 32.66, 30.07, 28.19, 26.93, 24.52, 22.62, 21.53, 17.80, 16.17, 15.72, 9.38; MS (MALDI) cal for C<sub>42</sub>H<sub>60</sub>O<sub>11</sub> [M+Na]<sup>+</sup> 763.402783, found [M+ Na]<sup>+</sup> 763.402919.

# Analytical data

## $^1\text{H}$ NMR of **1**

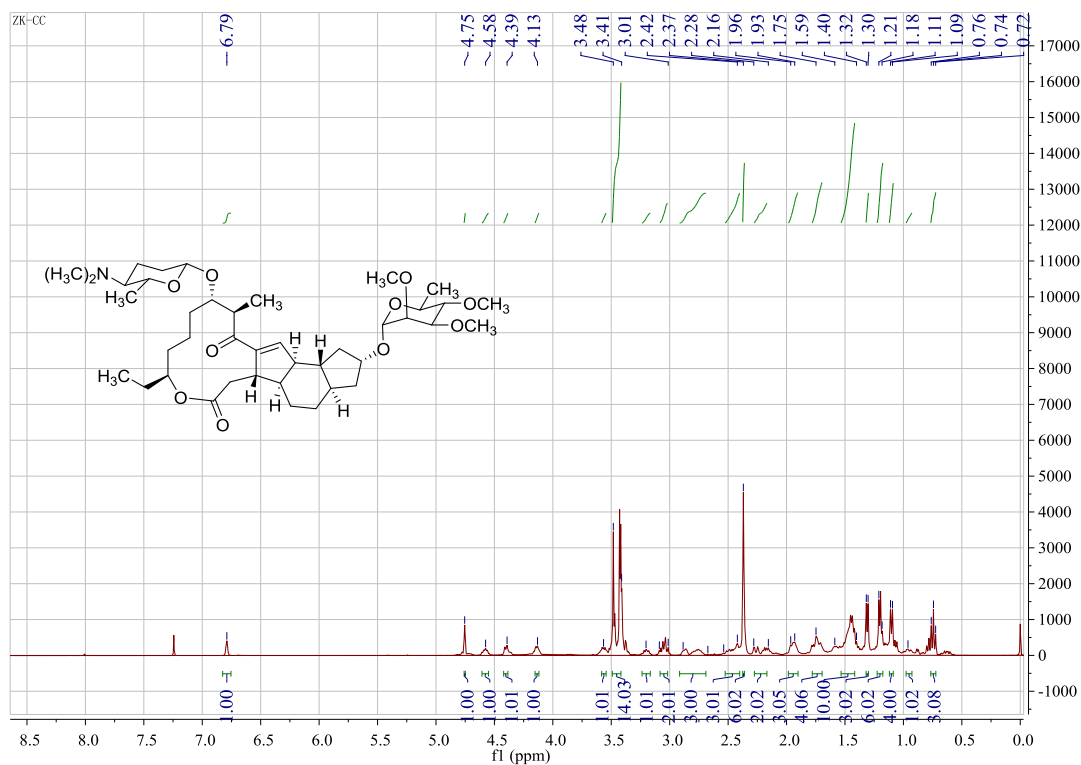

## $^{13}\text{C}$ NMR of **1**

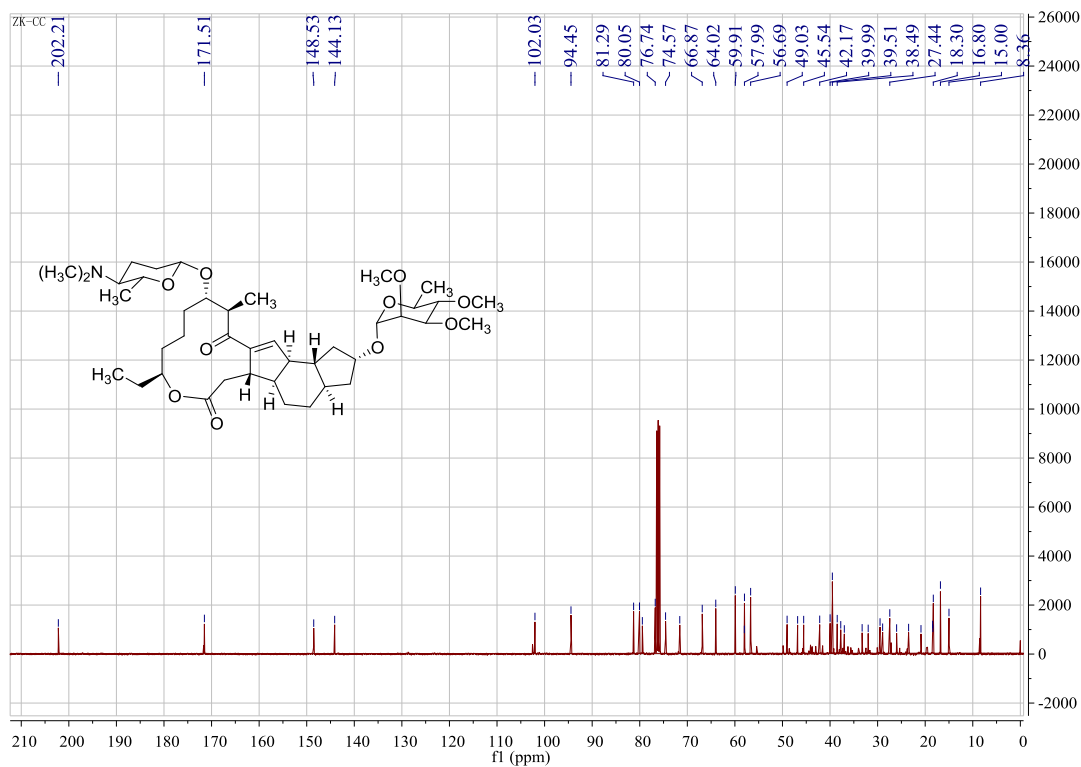

Chemical structure of compound 10a is shown. The  $^1\text{H}$  NMR spectrum (CDCl<sub>3</sub>) shows peaks at the following chemical shifts (ppm): 6.84, 4.60, 4.27, 3.58, 3.06, 2.90, 2.88, 2.75, 2.51, 2.27, 2.22, 1.80, 1.68, 1.62, 1.19, 1.15, 1.13, 0.94, and 0.75. Integration values are provided below the peaks: 1.00, 1.01, 1.01, 1.00, 2.02, 1.01, 1.00, 1.00, 2.01, 3.02, 13.04, 3.03, 1.01, and 3.00.

Chemical structure of compound 10a is shown. The <sup>13</sup>C NMR spectrum (CDCl<sub>3</sub>) shows peaks at the following chemical shifts (ppm): 202.53, 171.70, 148.75, 144.38, 71.25, 70.50, 49.11, 47.28, 46.21, 42.04, 41.23, 40.26, 40.06, 38.50, 33.95, 28.83, 27.46, 26.05, 23.45, 21.13, 14.64, and 8.39.

# <sup>1</sup>H NMR of 4

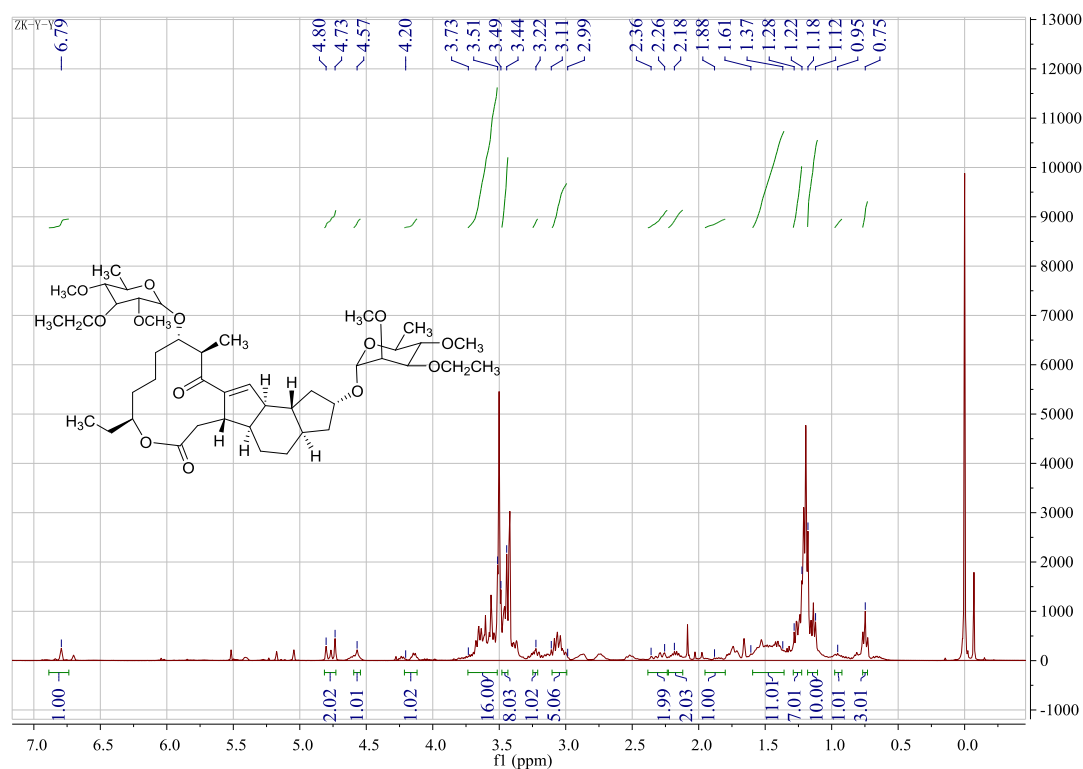

# <sup>13</sup>C NMR of 4

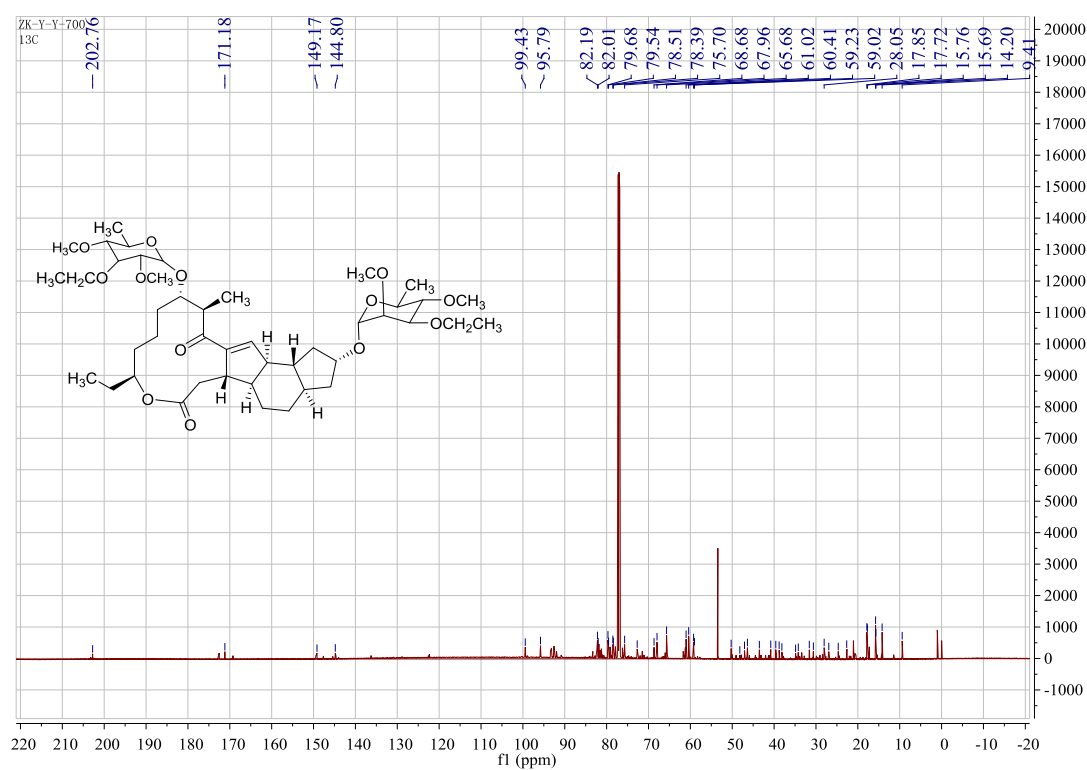

# <sup>1</sup>H NMR of 5

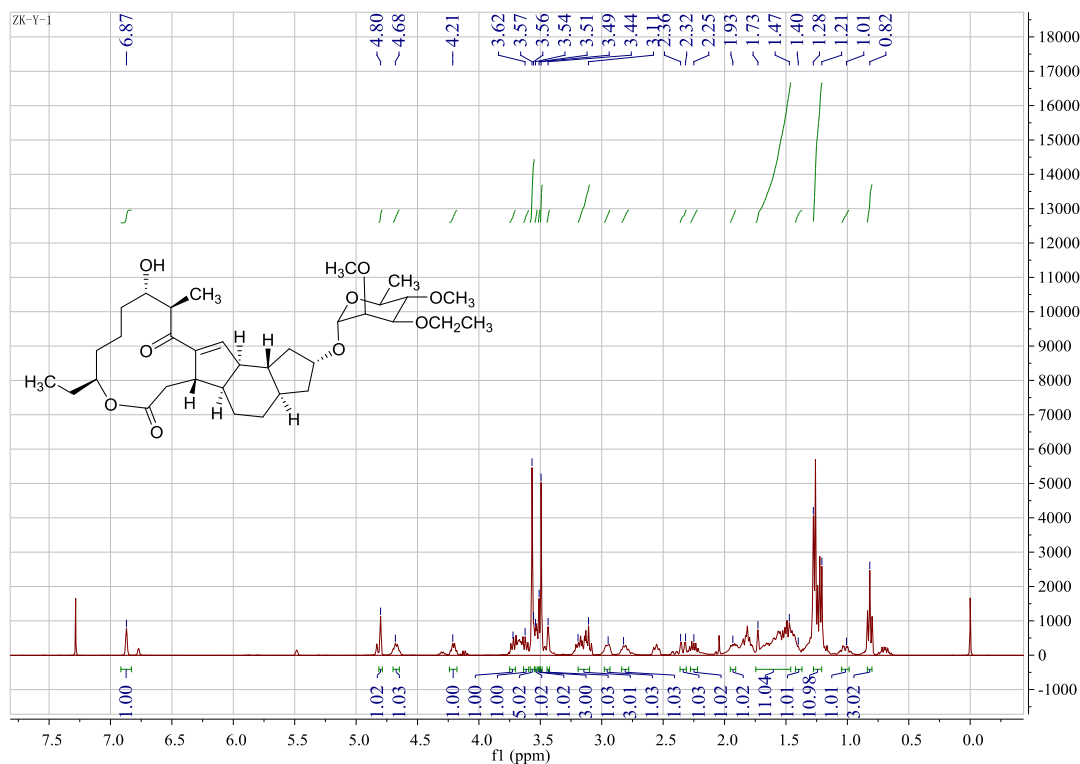

# <sup>13</sup>C NMR of 5

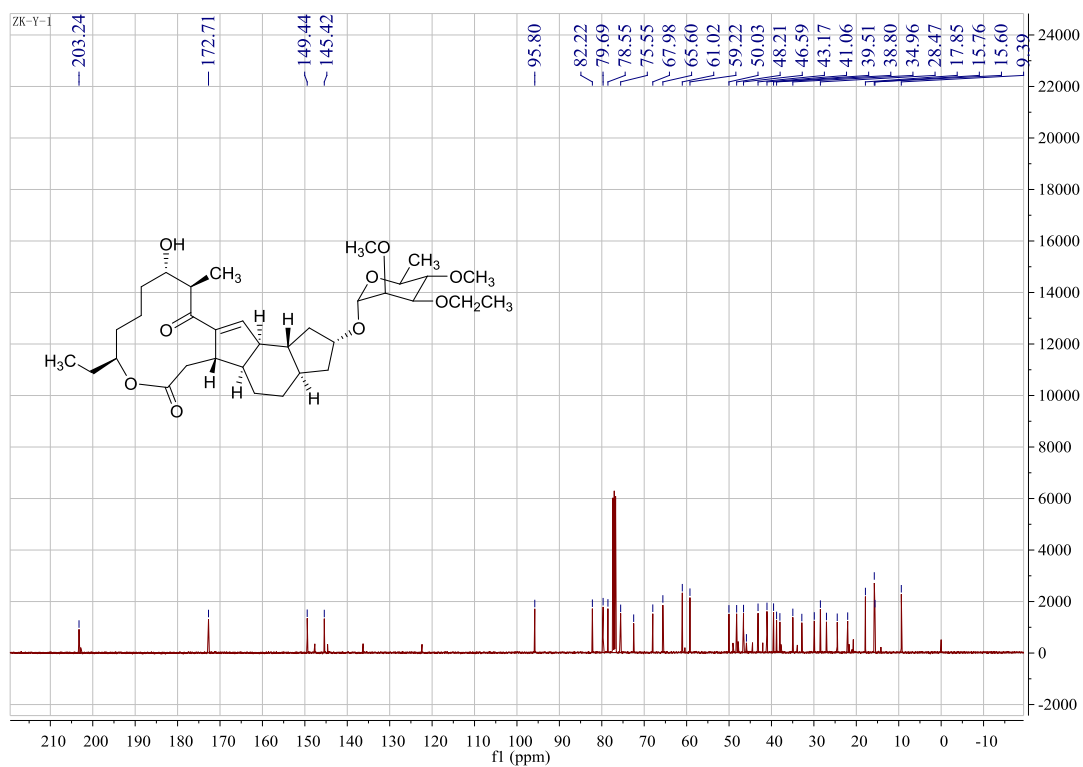



# <sup>1</sup>H NMR of **7a**

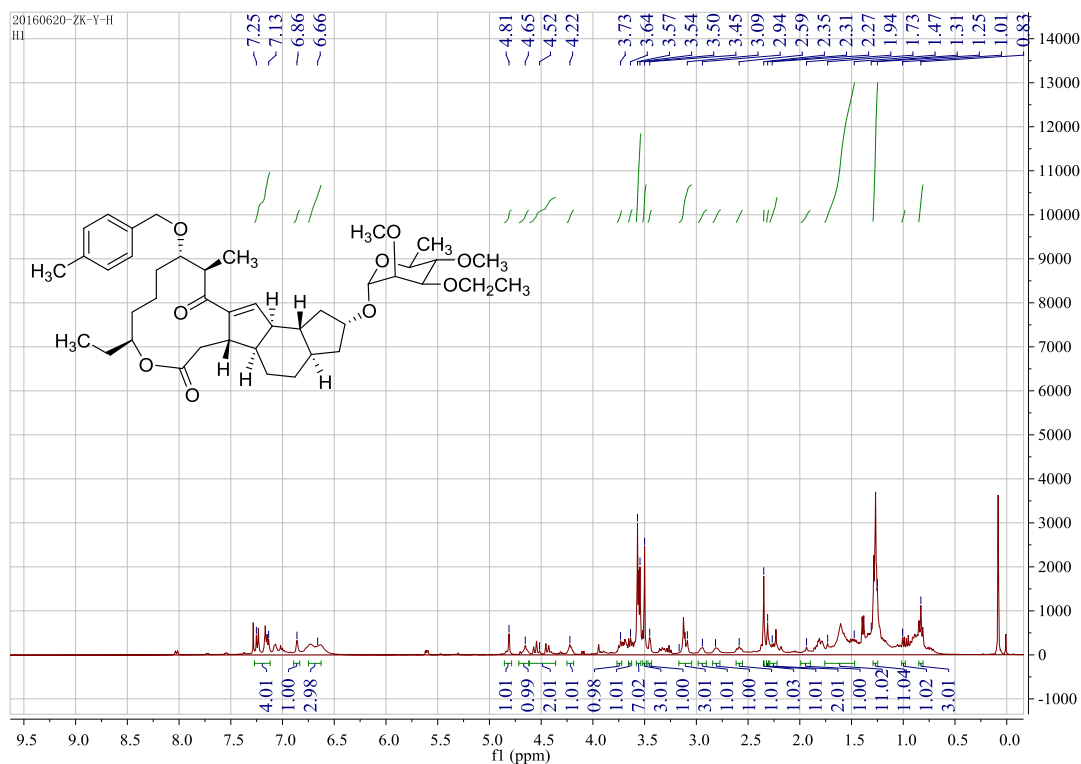

# <sup>13</sup>C NMR of **7a**

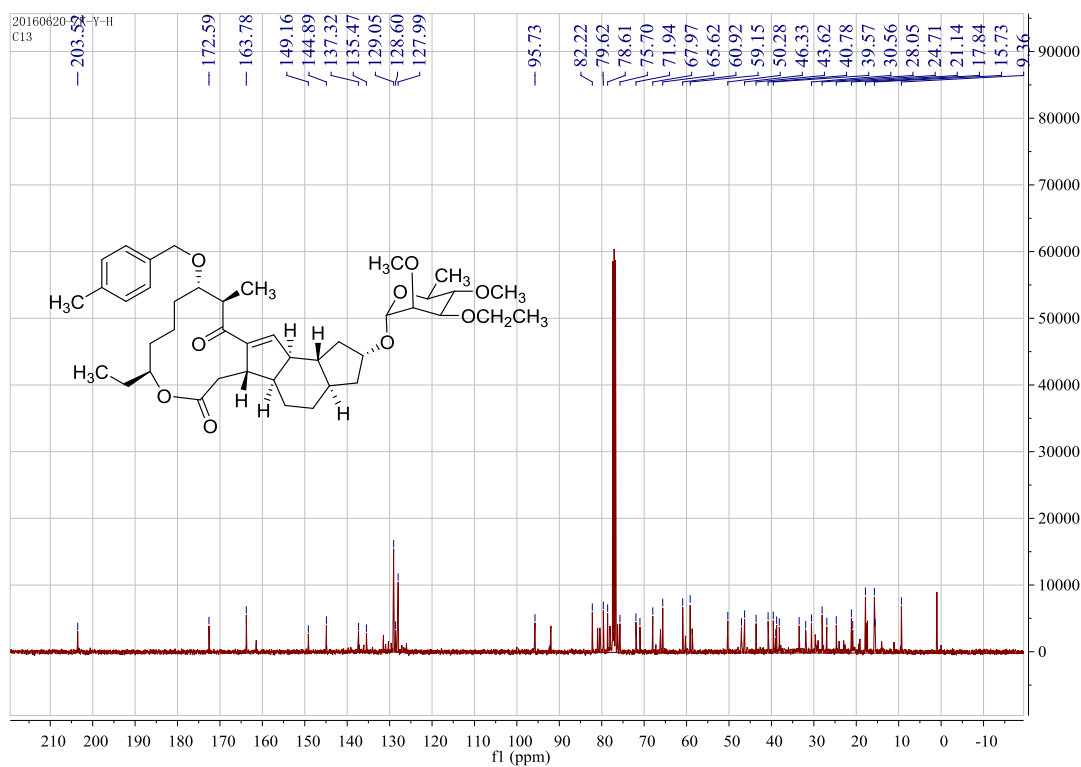

# <sup>1</sup>H NMR of **7b**

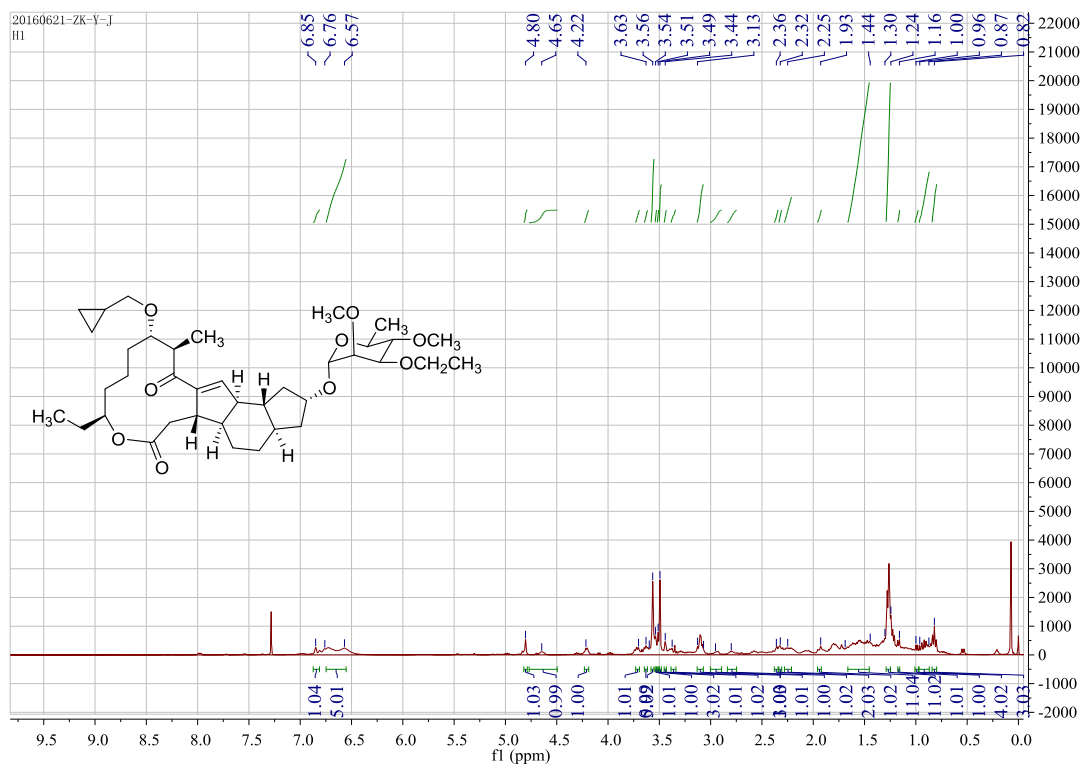

# <sup>13</sup>C NMR of **7b**

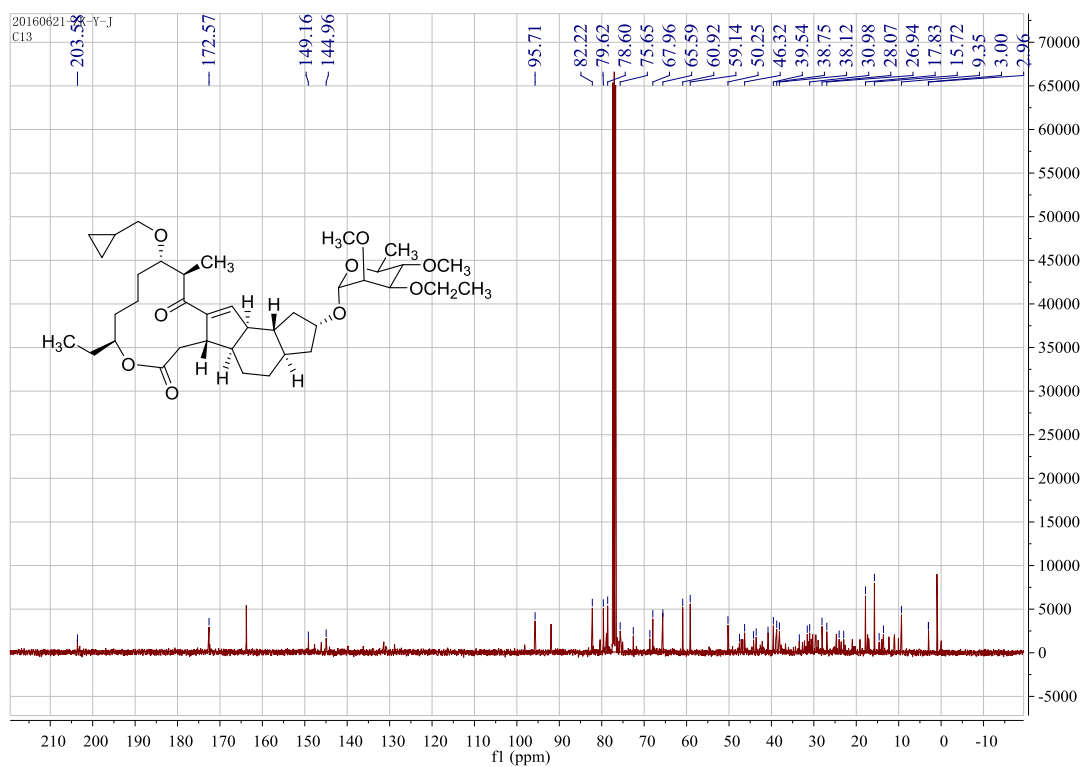

# <sup>1</sup>H NMR of 7c

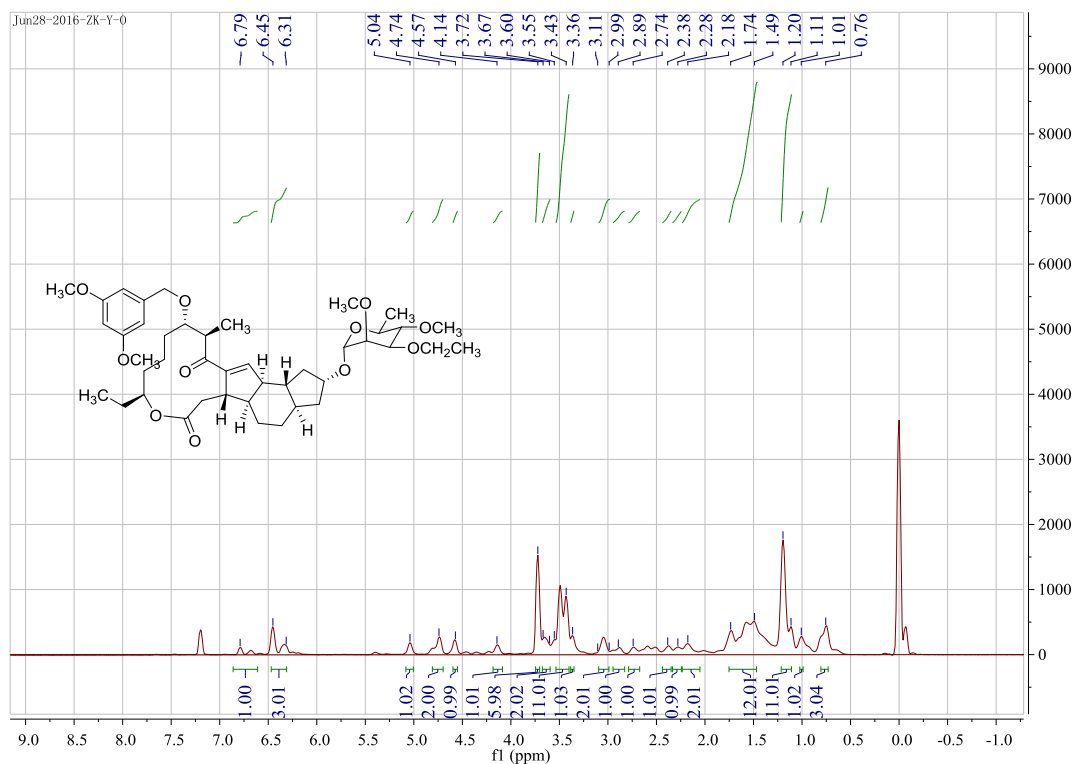

# <sup>13</sup>C NMR of 7c

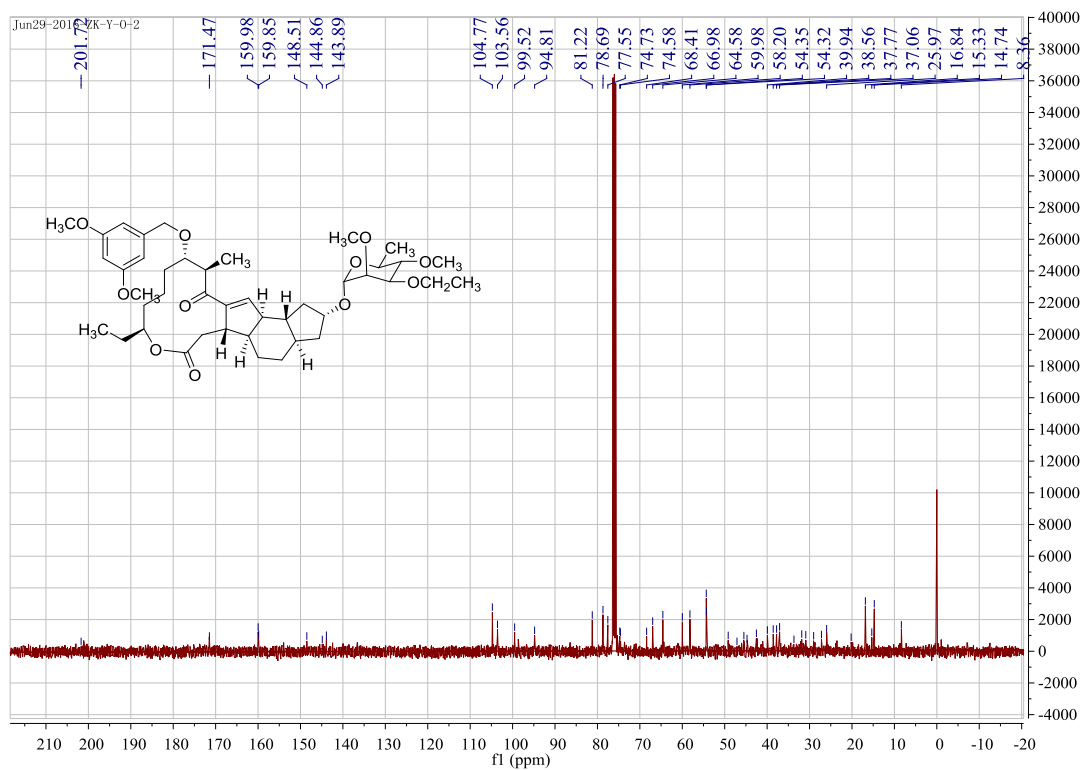

Jun28-2016-ZK-Y-P

Chemical structure of compound 10b is shown as an inset. The structure is a complex polycyclic molecule with a chlorophenyl group, a methyl group, a methoxy group, and an ethoxy group.

<sup>1</sup>H NMR spectrum (CDCl<sub>3</sub>) of compound 10b. The x-axis represents the chemical shift in ppm (f1), ranging from 0.0 to 12.00. The y-axis represents the intensity in arbitrary units, ranging from -1000 to 12000. The spectrum shows several peaks, with integration values provided below the peaks.

Integration values (from left to right): 3.98, 1.01, 6.07, 1.01, 1.01, 2.02, 0.99, 1.00, 0.99, 10.98, 1.02, 4.03, 0.99, 0.98, 2.00, 12.00, 11.00, 1.02, 3.03.

Chemical shift values (from left to right): 7.24, 7.13, 6.79, 6.62, 6.42, 4.98, 4.73, 4.60, 4.37, 4.15, 4.01, 3.55, 3.42, 3.28, 3.13, 2.79, 2.42, 2.28, 2.16, 1.85, 1.35, 1.27, 1.13, 1.02, 0.83.

Jun28-2016-ZK-Y-Y

Chemical structure of compound 10 is shown in the top left. The structure is a complex polycyclic molecule with a fluorinated benzene ring, a methyl group, a methoxy group, and a methoxyethyl group.

<sup>1</sup>H NMR spectrum (CDCl<sub>3</sub>) of compound 10. The x-axis represents the chemical shift in ppm (f1), ranging from 0.0 to 7.5. The y-axis represents the intensity, ranging from -500 to 7500. The spectrum shows several peaks, with integration values provided below the baseline.

Integration values (from left to right): 4.01, 1.00, 2.00, 0.99, 1.01, 0.98, 1.00, 1.01, 3.00, 0.99, 0.99, 2.01, 0.99, 1.00, 11.00, 10.99, 1.00, 3.02.

Chemical shift values (ppm) are listed above the spectrum: 6.97, 6.68, 4.72, 4.57, 4.48, 4.22, 4.02, 3.63, 3.54, 3.41, 3.18, 3.02, 2.86, 2.72, 2.43, 2.26, 2.17, 1.95, 1.72, 1.41, 1.33, 1.17, 0.96, 0.74.

Jun28-2016 ZK-Y-R  
C13

Chemical structure of compound 13 is shown. The structure is a complex polycyclic molecule featuring a fluorinated aromatic ring, a lactone, and a complex polycyclic core with various substituents including a methyl group, a methoxy group, and an ethoxy group.

<sup>13</sup>C NMR spectrum (f1 (ppm)) showing chemical shifts (ppm) for compound 13. The spectrum displays peaks corresponding to the structure, with labeled values including: 203.55, 172.37, 163.55, 163.12, 149.00, 144.76, 130.08, 113.92, 111.31, 111.06, 95.65, 82.11, 80.77, 78.47, 76.21, 75.61, 67.84, 65.45, 60.75, 58.99, 50.22, 46.70, 46.17, 43.56, 40.66, 39.44, 27.95, 20.51, 17.72, 16.88, 15.63, and 9.75.

**Chemical structure of compound 10:** CCOC1C(C)C(OC(=O)C2C(C)C(C)C2)OC(=O)C3C(C)C(C)C3C(=O)C4C(C)C(C)C4C(=O)C5C(C)C(C)C5C(=O)C6C(C)C(C)C6C(=O)C7C(C)C(C)C7C(=O)C8C(C)C(C)C8C(=O)C9C(C)C(C)C9C(=O)C10C(C)C(C)C10C(=O)C11C(C)C(C)C11C(=O)C12C(C)C(C)C12C(=O)C13C(C)C(C)C13C(=O)C14C(C)C(C)C14C(=O)C15C(C)C(C)C15C(=O)C16C(C)C(C)C16C(=O)C17C(C)C(C)C17C(=O)C18C(C)C(C)C18C(=O)C19C(C)C(C)C19C(=O)C20C(C)C(C)C20C(=O)C21C(C)C(C)C21C(=O)C22C(C)C(C)C22C(=O)C23C(C)C(C)C23C(=O)C24C(C)C(C)C24C(=O)C25C(C)C(C)C25C(=O)C26C(C)C(C)C26C(=O)C27C(C)C(C)C27C(=O)C28C(C)C(C)C28C(=O)C29C(C)C(C)C29C(=O)C30C(C)C(C)C30C(=O)C31C(C)C(C)C31C(=O)C32C(C)C(C)C32C(=O)C33C(C)C(C)C33C(=O)C34C(C)C(C)C34C(=O)C35C(C)C(C)C35C(=O)C36C(C)C(C)C36C(=O)C37C(C)C(C)C37C(=O)C38C(C)C(C)C38C(=O)C39C(C)C(C)C39C(=O)C40C(C)C(C)C40C(=O)C41C(C)C(C)C41C(=O)C42C(C)C(C)C42C(=O)C43C(C)C(C)C43C(=O)C44C(C)C(C)C44C(=O)C45C(C)C(C)C45C(=O)C46C(C)C(C)C46C(=O)C47C(C)C(C)C47C(=O)C48C(C)C(C)C48C(=O)C49C(C)C(C)C49C(=O)C50C(C)C(C)C50C(=O)C51C(C)C(C)C51C(=O)C52C(C)C(C)C52C(=O)C53C(C)C(C)C53C(=O)C54C(C)C(C)C54C(=O)C55C(C)C(C)C55C(=O)C56C(C)C(C)C56C(=O)C57C(C)C(C)C57C(=O)C58C(C)C(C)C58C(=O)C59C(C)C(C)C59C(=O)C60C(C)C(C)C60C(=O)C61C(C)C(C)C61C(=O)C62C(C)C(C)C62C(=O)C63C(C)C(C)C63C(=O)C64C(C)C(C)C64C(=O)C65C(C)C(C)C65C(=O)C66C(C)C(C)C66C(=O)C67C(C)C(C)C67C(=O)C68C(C)C(C)C68C(=O)C69C(C)C(C)C69C(=O)C70C(C)C(C)C70C(=O)C71C(C)C(C)C71C(=O)C72C(C)C(C)C72C(=O)C73C(C)C(C)C73C(=O)C74C(C)C(C)C74C(=O)C75C(C)C(C)C75C(=O)C76C(C)C(C)C76C(=O)C77C(C)C(C)C77C(=O)C78C(C)C(C)C78C(=O)C79C(C)C(C)C79C(=O)C80C(C)C(C)C80C(=O)C81C(C)C(C)C81C(=O)C82C(C)C(C)C82C(=O)C83C(C)C(C)C83C(=O)C84C(C)C(C)C84C(=O)C85C(C)C(C)C85C(=O)C86C(C)C(C)C86C(=O)C87C(C)C(C)C87C(=O)C88C(C)C(C)C88C(=O)C89C(C)C(C)C89C(=O)C90C(C)C(C)C90C(=O)C91C(C)C(C)C91C(=O)C92C(C)C(C)C92C(=O)C93C(C)C(C)C93C(=O)C94C(C)C(C)C94C(=O)C95C(C)C(C)C95C(=O)C96C(C)C(C)C96C(=O)C97C(C)C(C)C97C(=O)C98C(C)C(C)C98C(=O)C99C(C)C(C)C99C(=O)C100C(C)C(C)C100C(=O)C101C(C)C(C)C101C(=O)C102C(C)C(C)C102C(=O)C103C(C)C(C)C103C(=O)C104C(C)C(C)C104C(=O)C105C(C)C(C)C105C(=O)C106C(C)C(C)C106C(=O)C107C(C)C(C)C107C(=O)C108C(C)C(C)C108C(=O)C109C(C)C(C)C109C(=O)C110C(C)C(C)C110C(=O)C111C(C)C(C)C111C(=O)C112C(C)C(C)C112C(=O)C113C(C)C(C)C113C(=O)C114C(C)C(C)C114C(=O)C115C(C)C(C)C115C(=O)C116C(C)C(C)C116C(=O)C117C(C)C(C)C117C(=O)C118C(C)C(C)C118C(=O)C119C(C)C(C)C119C(=O)C120C(C)C(C)C120C(=O)C121C(C)C(C)C121C(=O)C122C(C)C(C)C122C(=O)C123C(C)C(C)C123C(=O)C124C(C)C(C)C124C(=O)C125C(C)C(C)C125C(=O)C126C(C)C(C)C126C(=O)C127C(C)C(C)C127C(=O)C128C(C)C(C)C128C(=O)C129C(C)C(C)C129C(=O)C130C(C)C(C)C130C(=O)C131C(C)C(C)C131C(=O)C132C(C)C(C)C132C(=O)C133C(C)C(C)C133C(=O)C134C(C)C(C)C134C(=O)C135C(C)C(C)C135C(=O)C136C(C)C(C)C136C(=O)C137C(C)C(C)C137C(=O)C138C(C)C(C)C138C(=O)C139C(C)C(C)C139C(=O)C140C(C)C(C)C140C(=O)C141C(C)C(C)C141C(=O)C142C(C)C(C)C142C(=O)C143C(C)C(C)C143C(=O)C144C(C)C(C)C144C(=O)C145C(C)C(C)C145C(=O)C146C(C)C(C)C146C(=O)C147C(C)C(C)C147C(=O)C148C(C)C(C)C148C(=O)C149C(C)C(C)C149C(=O)C150C(C)C(C)C150C(=O)C151C(C)C(C)C151C(=O)C152C(C)C(C)C152C(=O)C153C(C)C(C)C153C(=O)C154C(C)C(C)C154C(=O)C155C(C)C(C)C155C(=O)C156C(C)C(C)C156C(=O)C157C(C)C(C)C157C(=O)C158C(C)C(C)C158C(=O)C159C(C)C(C)C159C(=O)C160C(C)C(C)C160C(=O)C161C(C)C(C)C161C(=O)C162C(C)C(C)C162C(=O)C163C(C)C(C)C163C(=O)C164C(C)C(C)C164C(=O)C165C(C)C(C)C165C(=O)C166C(C)C(C)C166C(=O)C167C(C)C(C)C167C(=O)C168C(C)C(C)C168C(=O)C169C(C)C(C)C169C(=O)C170C(C)C(C)C170C(=O)C171C(C)C(C)C171C(=O)C172C(C)C(C)C172C(=O)C173C(C)C(C)C173C(=O)C174C(C)C(C)C174C(=O)C175C(C)C(C)C175C(=O)C176C(C)C(C)C176C(=O)C177C(C)C(C)C177C(=O)C178C(C)C(C)C178C(=O)C179C(C)C(C)C179C(=O)C180C(C)C(C)C180C(=O)C181C(C)C(C)C181C(=O)C182C(C)C(C)C182C(=O)C183C(C)C(C)C183C(=O)C184C(C)C(C)C184C(=O)C185C(C)C(C)C185C(=O)C186C(C)C(C)C186C(=O)C187C(C)C(C)C187C(=O)C188C(C)C(C)C188C(=O)C189C(C)C(C)C189C(=O)C190C(C)C(C)C190C(=O)C191C(C)C(C)C191C(=O)C192C(C)C(C)C192C(=O)C193C(C)C(C)C193C(=O)C194C(C)C(C)C194C(=O)C195C(C)C(C)C195C(=O)C196C(C)C(C)C196C(=O)C197C(C)C(C)C197C(=O)C198C(C)C(C)C198C(=O)C199C(C)C(C)C199C(=O)C200C(C)C(C)C200C(=O)C201C(C)C(C)C201C(=O)C202C(C)C(C)C202C(=O)C203C(C)C(C)C203C(=O)C204C(C)C(C)C204C(=O)C205C(C)C(C)C205C(=O)C206C(C)C(C)C206C(=O)C207C(C)C(C)C207C(=O)C208C(C)C(C)C208C(=O)C209C(C)C(C)C209C(=O)C210C(C)C(C)C210C(=O)C211C(C)C(C)C211C(=O)C212C(C)C(C)C212C(=O)C213C(C)C(C)C213C(=O)C214C(C)C(C)C214C(=O)C215C(C)C(C)C215C(=O)C216C(C)C(C)C216C(=O)C217C(C)C(C)C217C(=O)C218C(C)C(C)C218C(=O)C219C(C)C(C)C219C(=O)C220C(C)C(C)C220C(=O)C221C(C)C(C)C221C(=O)C222C(C)C(C)C222C(=O)C223C(C)C(C)C

Chemical structure of compound 10 is shown, along with its <sup>13</sup>C NMR spectrum (Figure 1). The chemical structure is a complex polycyclic molecule featuring a central steroid-like core with various functional groups, including a trifluoromethyl group (CF<sub>3</sub>), a methoxy group (OCH<sub>3</sub>), and a propyl group (CH<sub>2</sub>CH<sub>2</sub>CH<sub>3</sub>). The <sup>13</sup>C NMR spectrum displays peaks from -20 to 210 ppm, with major peaks labeled at 202.16, 171.60, 162.94, 148.46, 143.79, 140.83, 129.97, 129.03, 127.91, 123.26, 122.48, 94.72, 90.90, 81.21, 80.09, 78.58, 77.59, 74.73, 66.95, 64.63, 63.35, 59.91, 58.13, 45.98, 39.78, 38.58, 37.75, 29.52, 27.01, 25.90, 18.11, 16.79, 14.69, and 8.42 ppm.

# <sup>1</sup>H NMR of **7g**

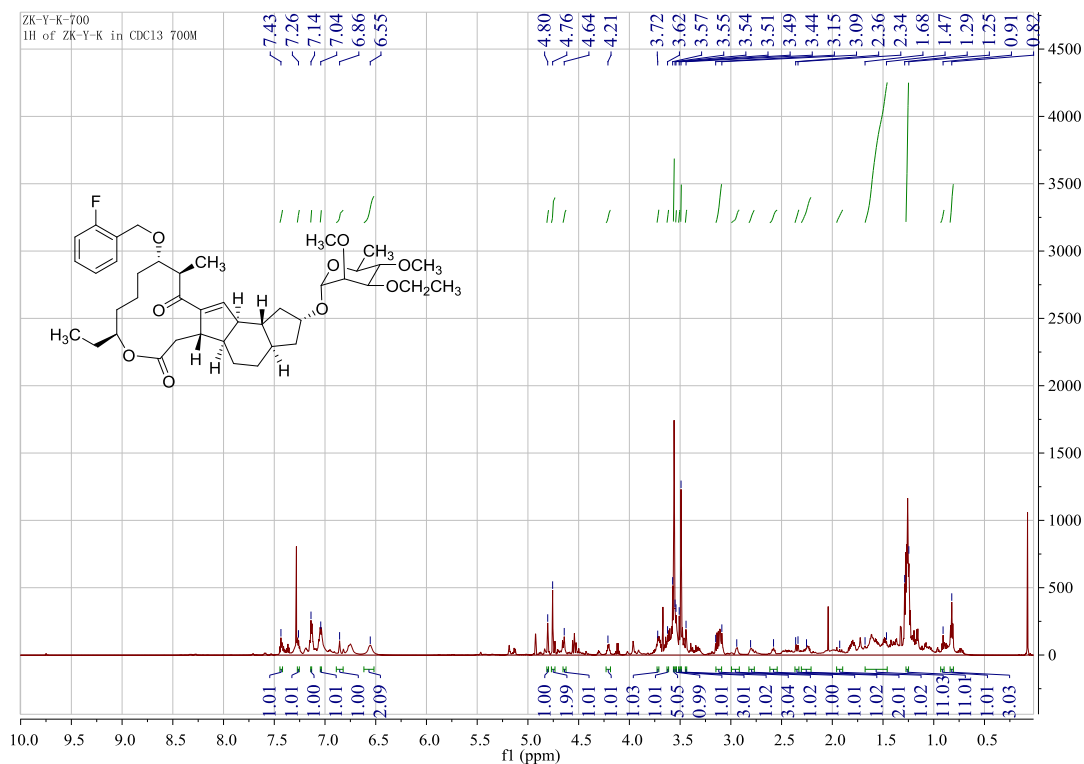

# <sup>13</sup>C NMR of **7g**

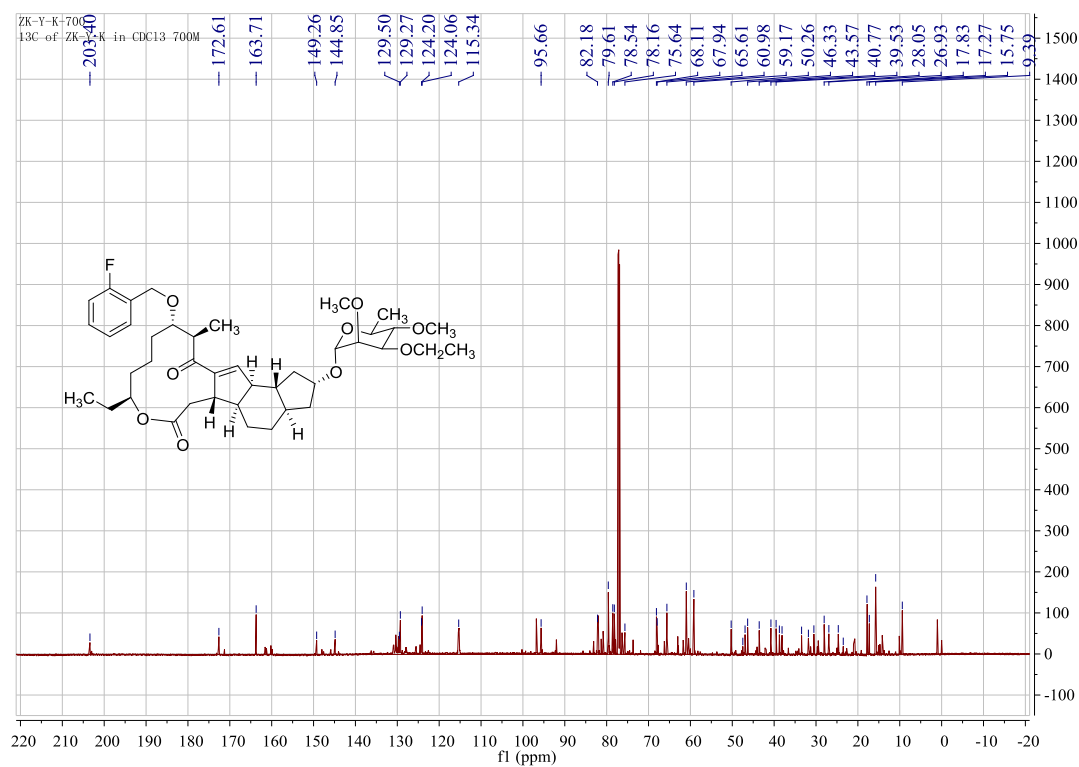

# <sup>1</sup>H NMR of **7h**

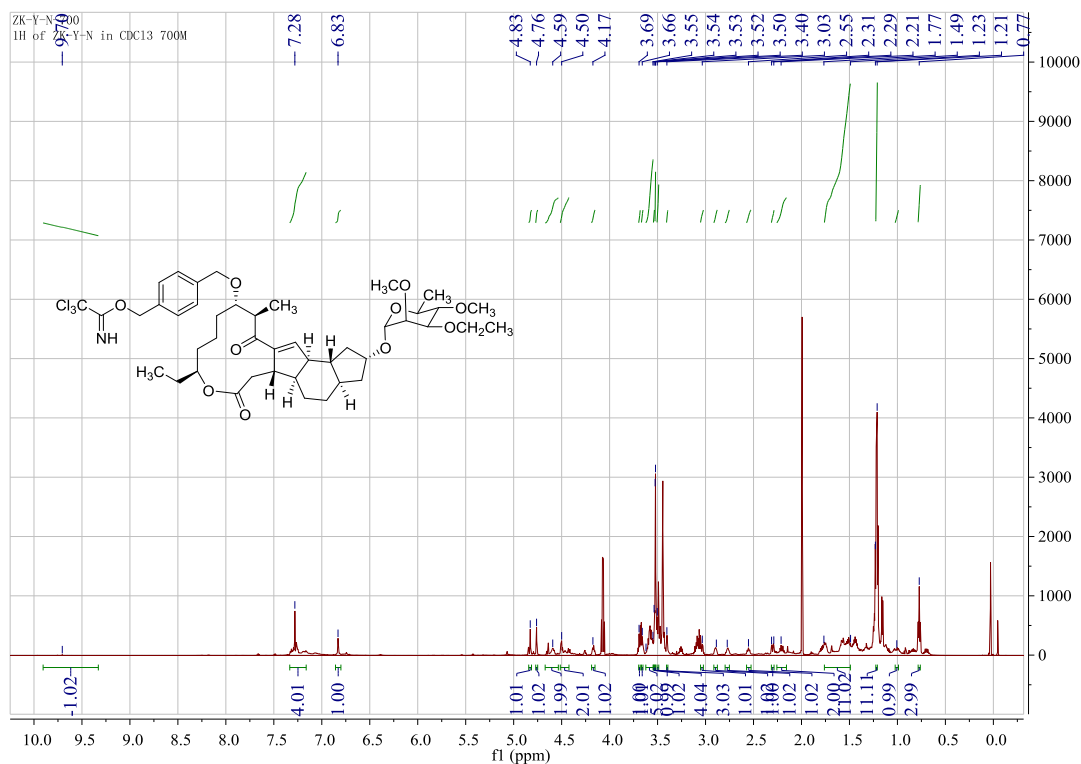

# <sup>13</sup>C NMR of **7h**

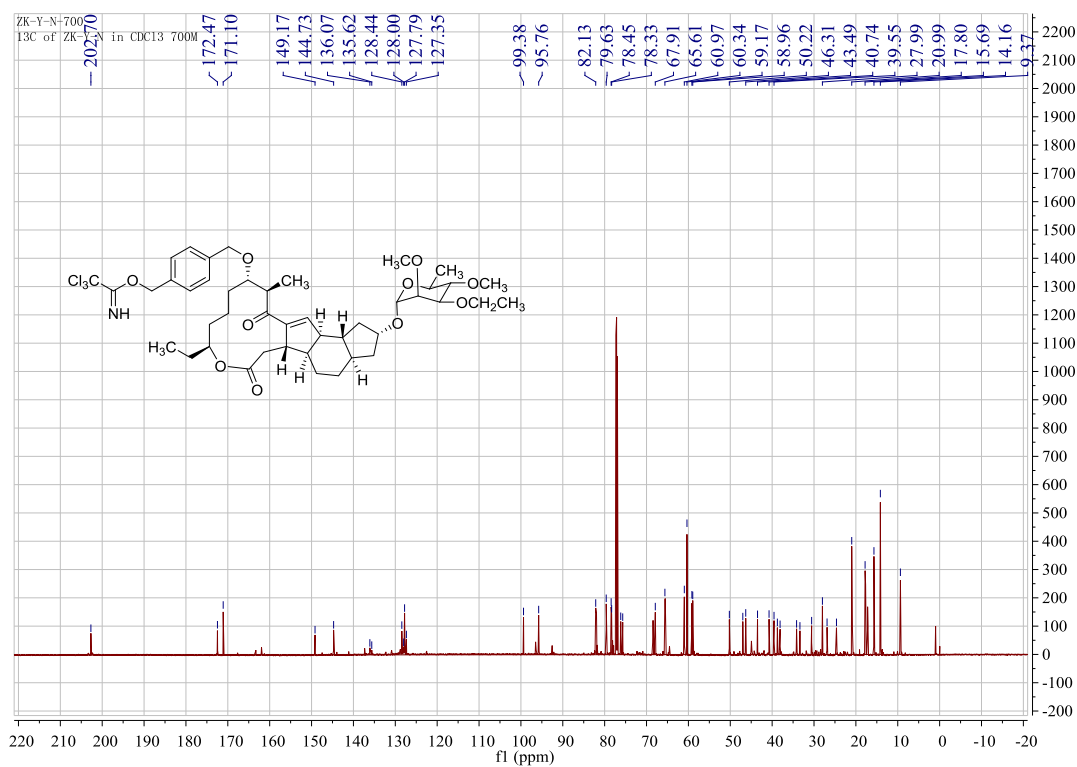



# <sup>1</sup>H NMR of **7i**

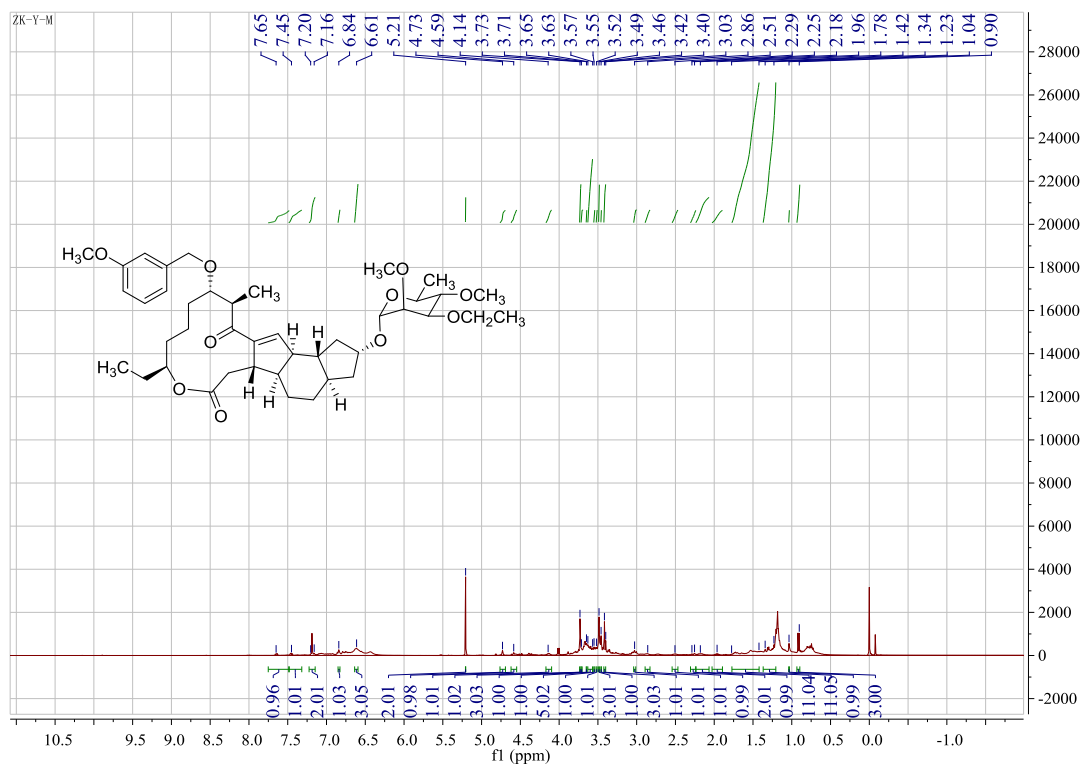

# <sup>13</sup>C NMR of **7i**

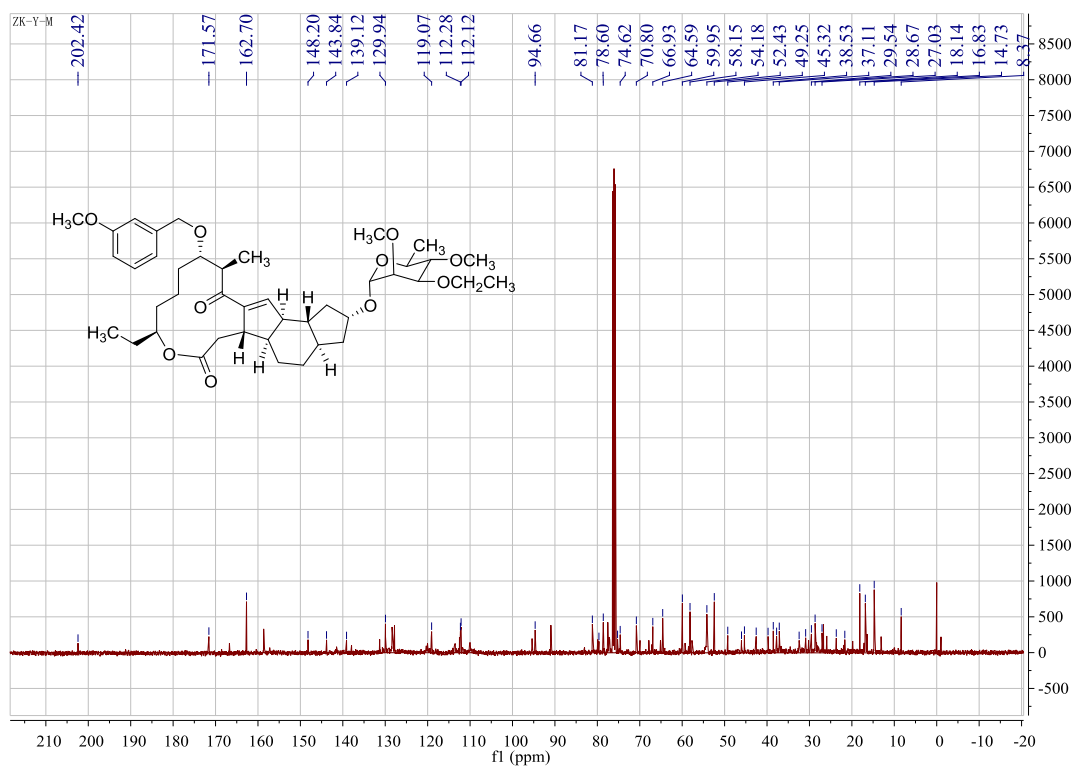

# <sup>1</sup>H NMR of 7j

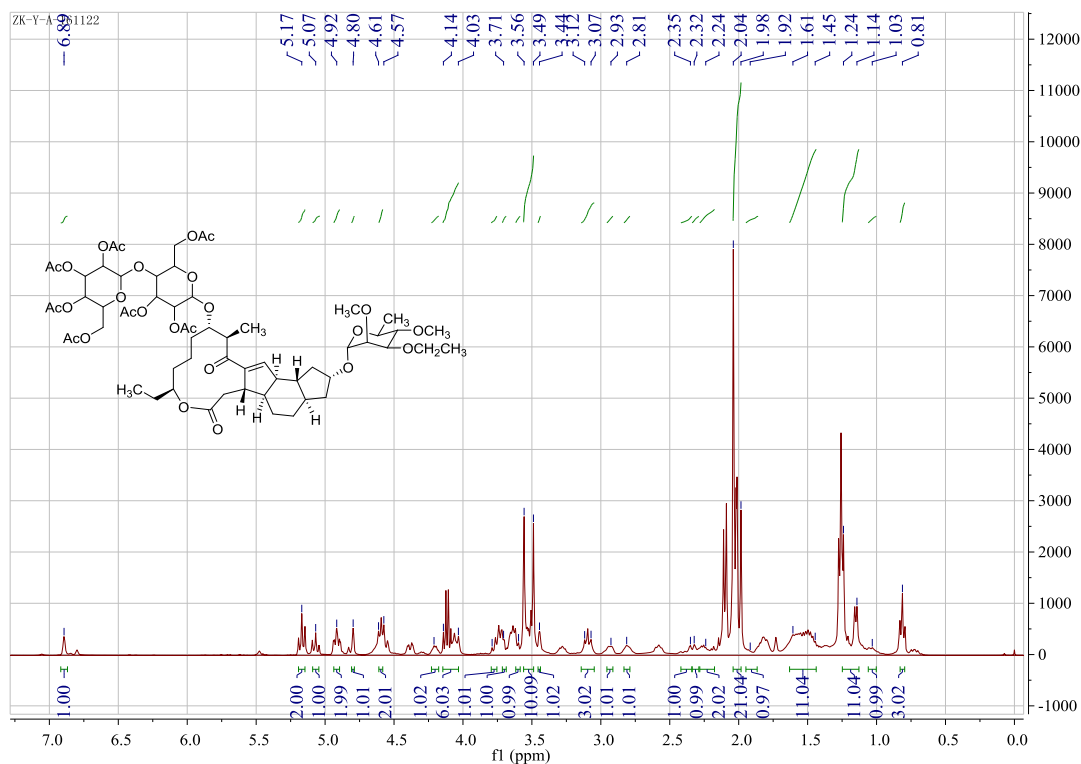

# <sup>13</sup>C NMR of 7j

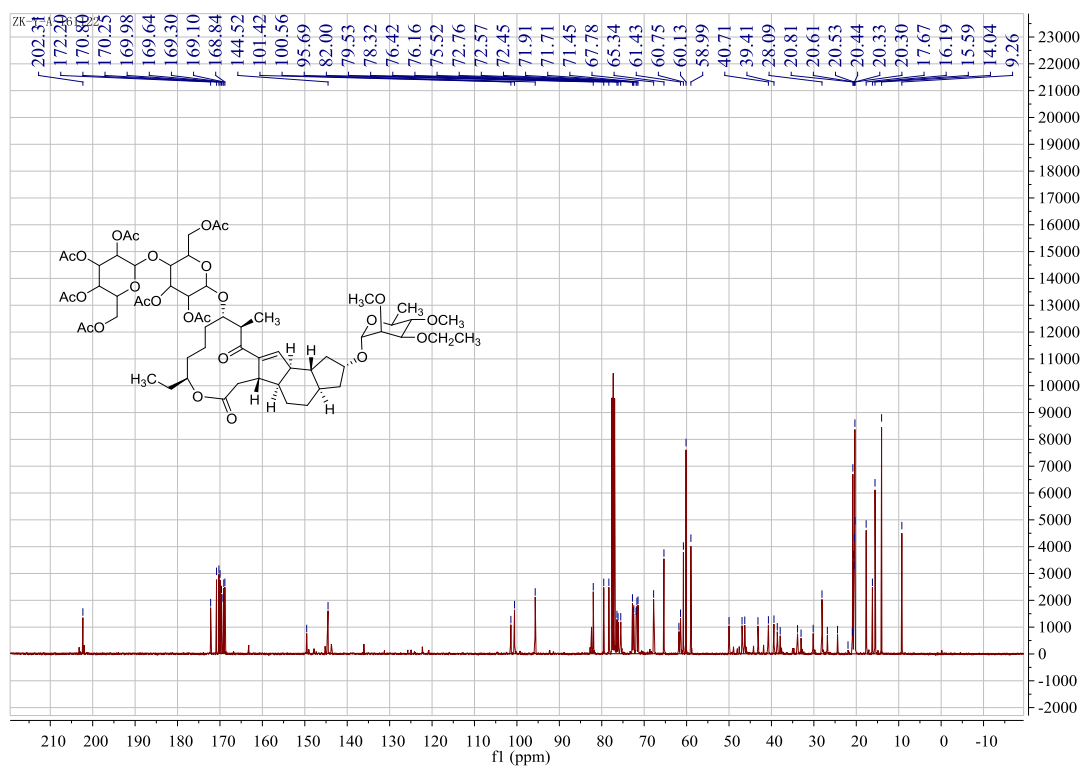

# <sup>1</sup>H NMR of 7k

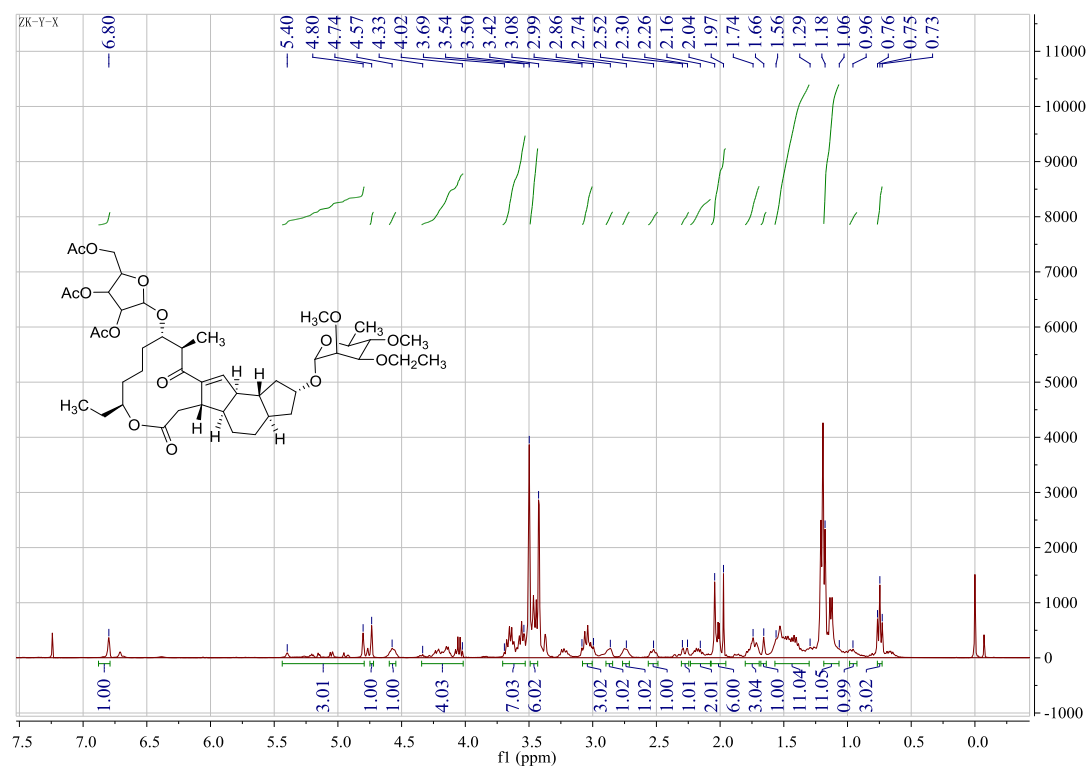

# <sup>13</sup>C NMR of 7k

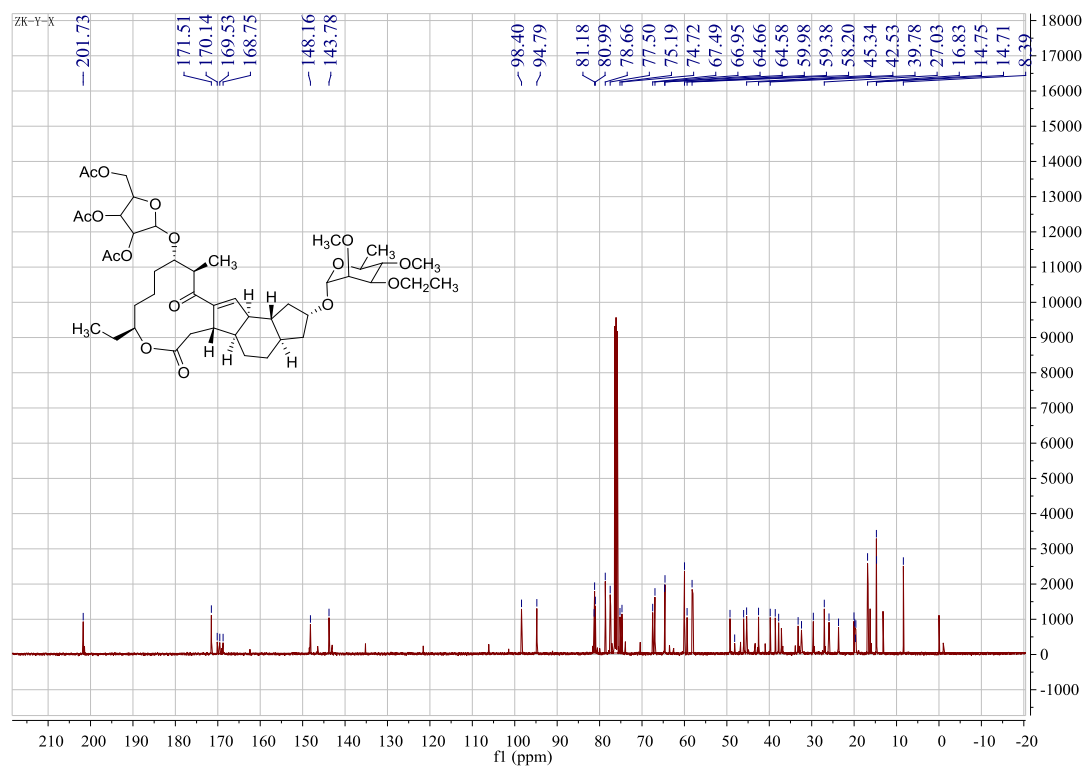

# <sup>1</sup>H NMR of **71**

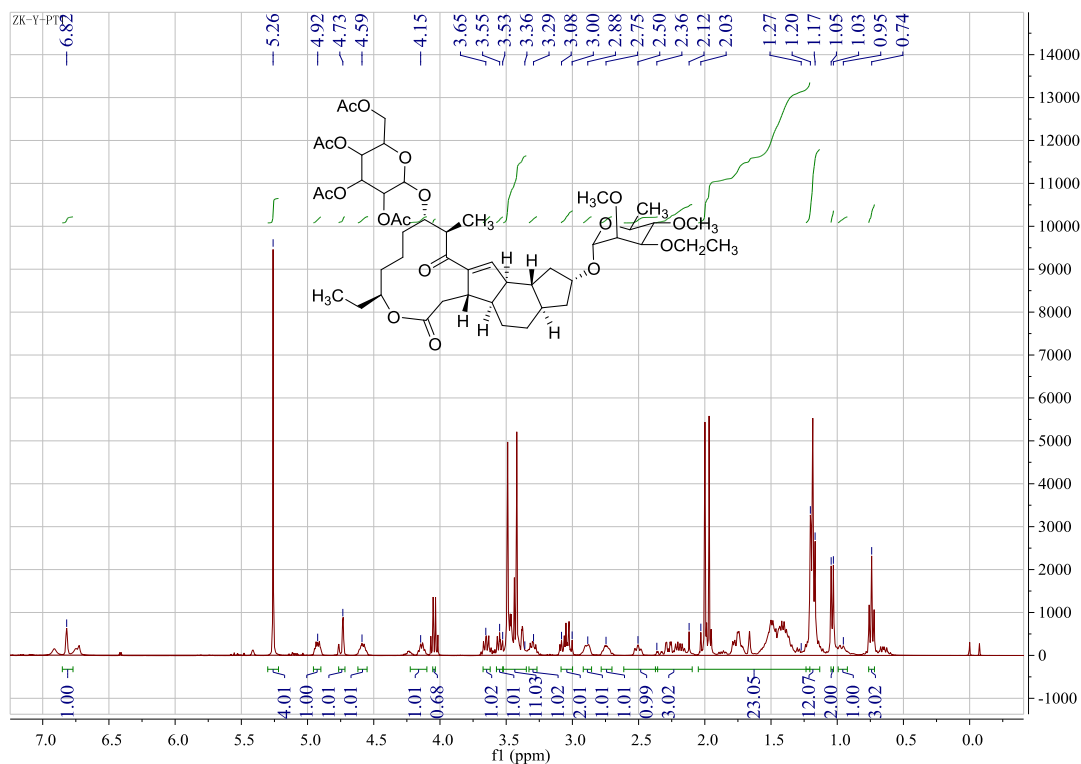

# <sup>13</sup>C NMR of **71**

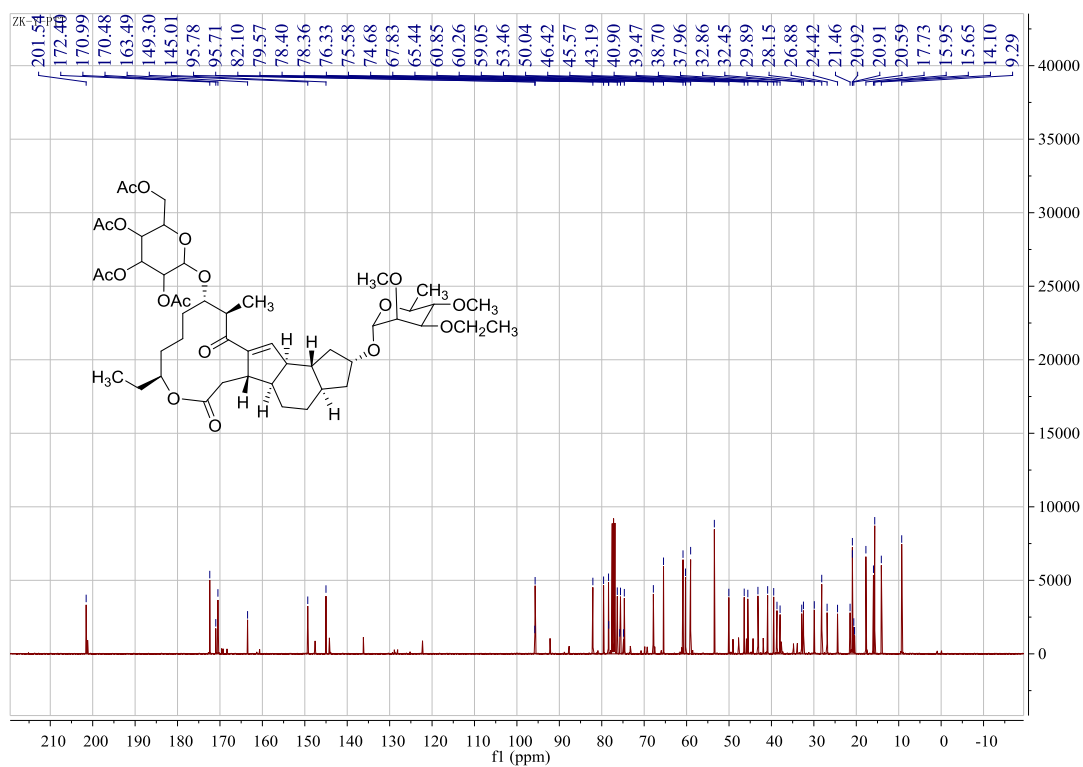

# <sup>1</sup>H NMR of **8a**

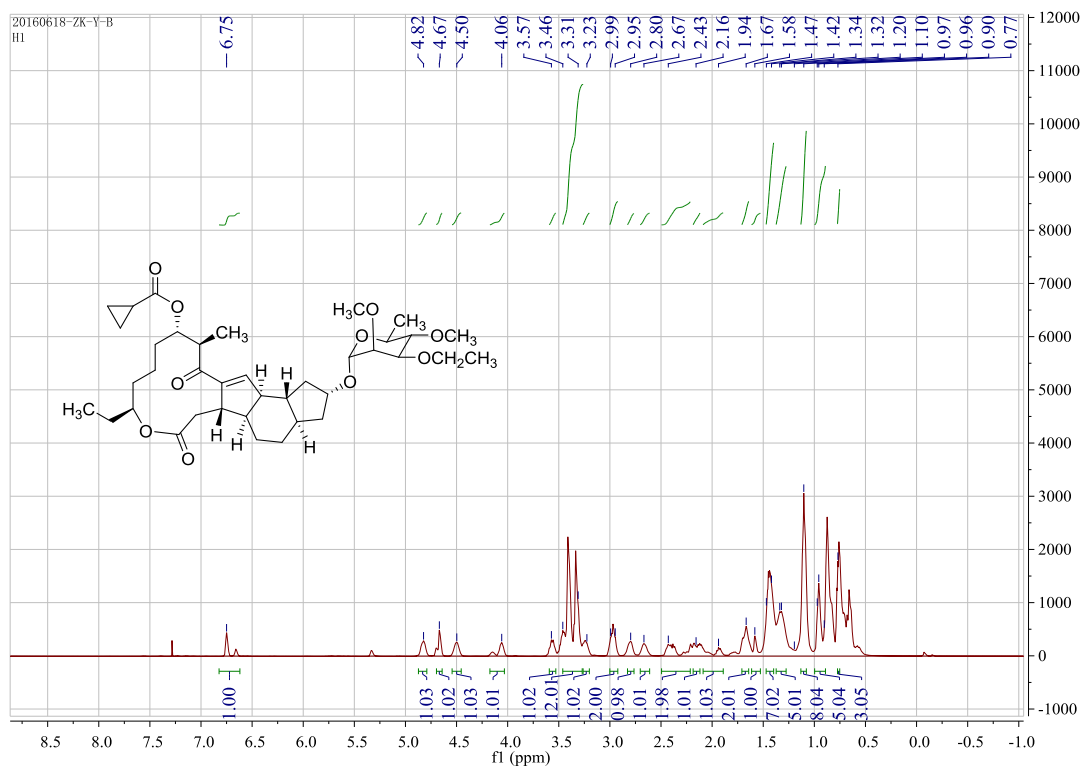

# <sup>13</sup>C NMR of **8a**

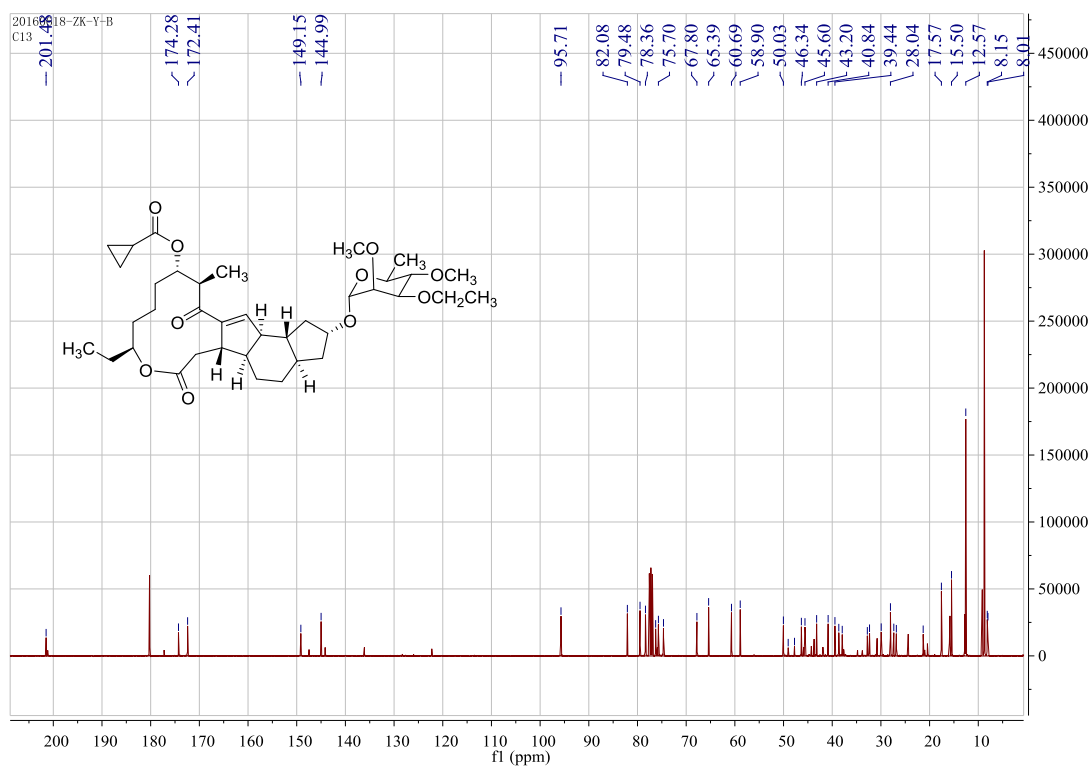

# <sup>1</sup>H NMR of **8b**

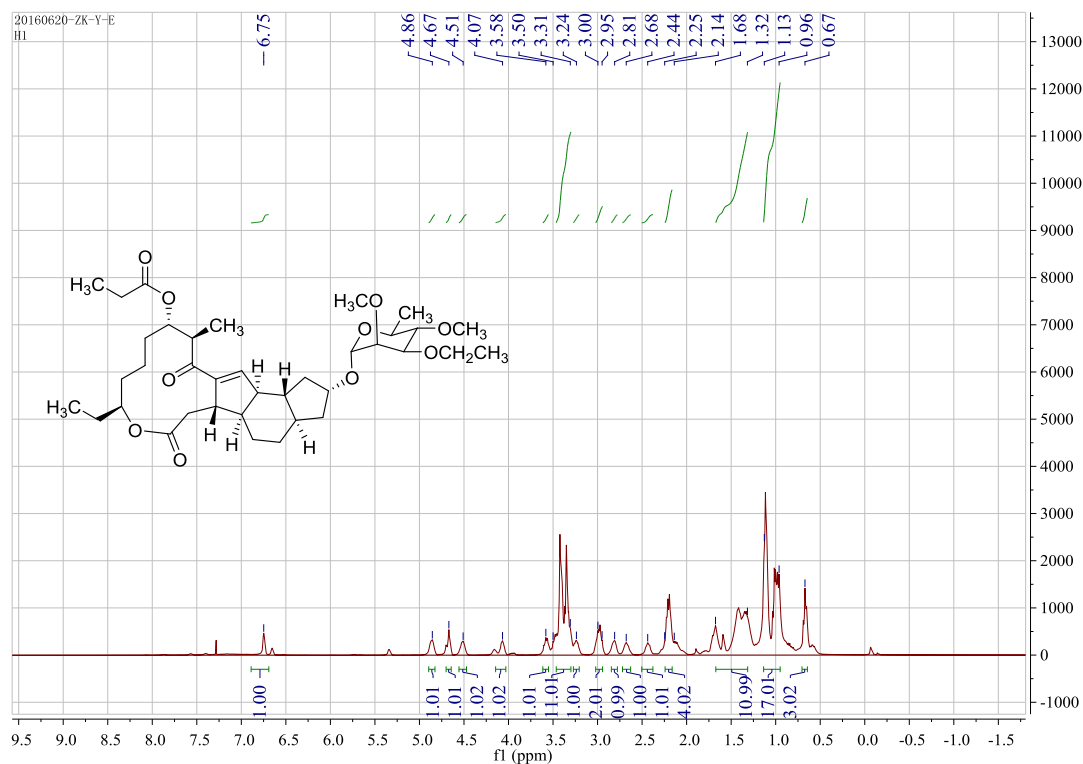

# <sup>13</sup>C NMR of **8b**

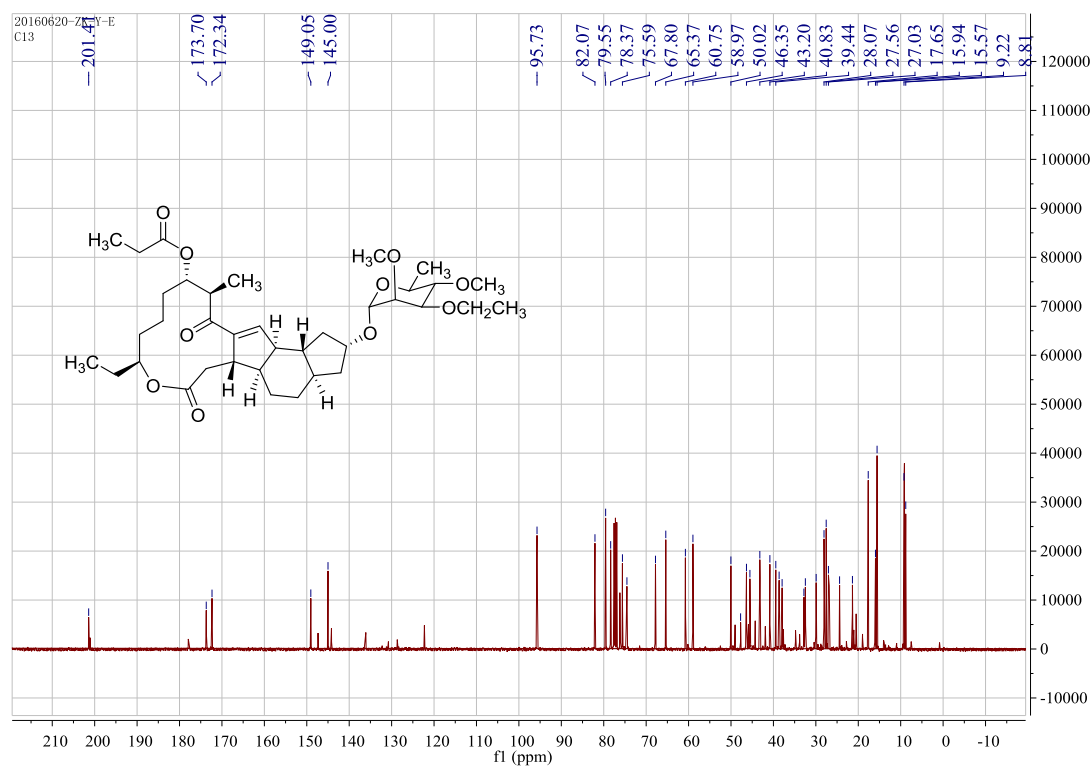

# <sup>1</sup>H NMR of **8c**

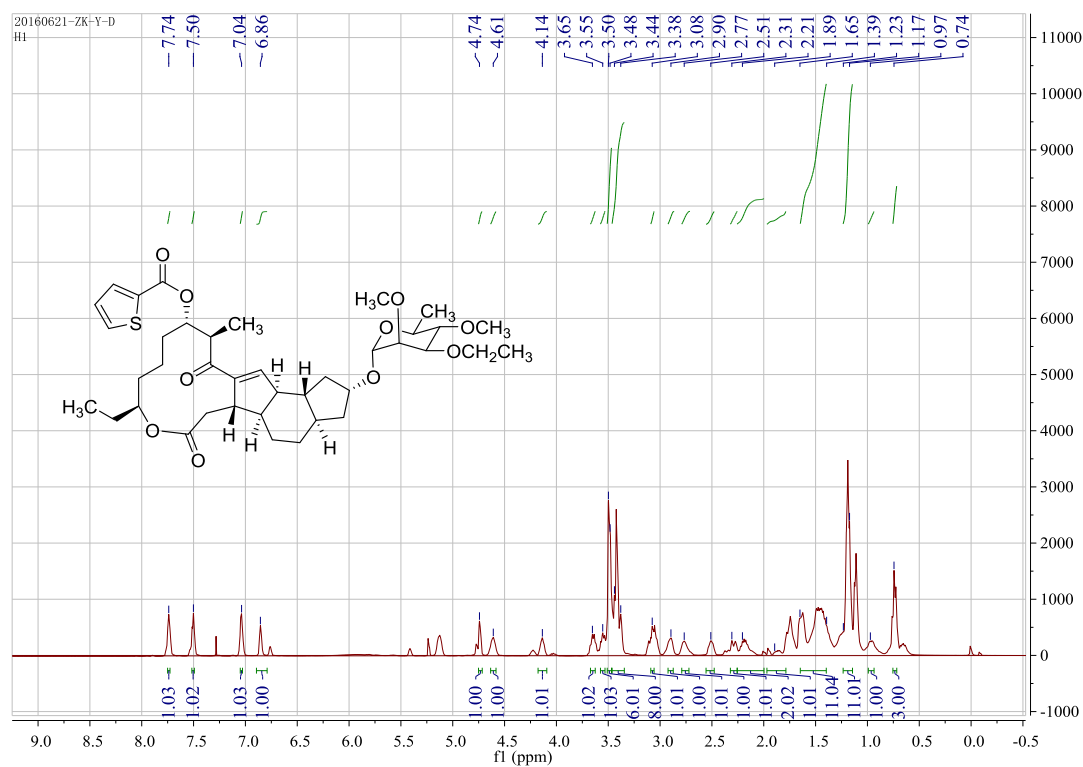

# <sup>13</sup>C NMR of **8c**

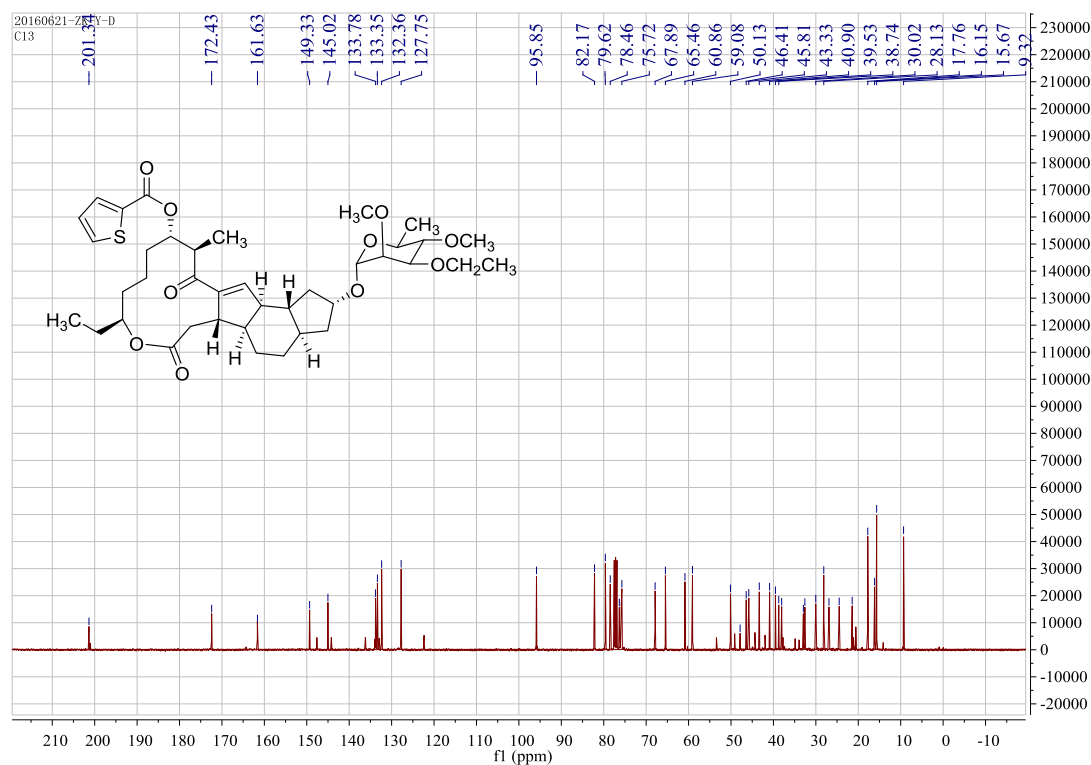

# <sup>1</sup>H NMR of **8d**

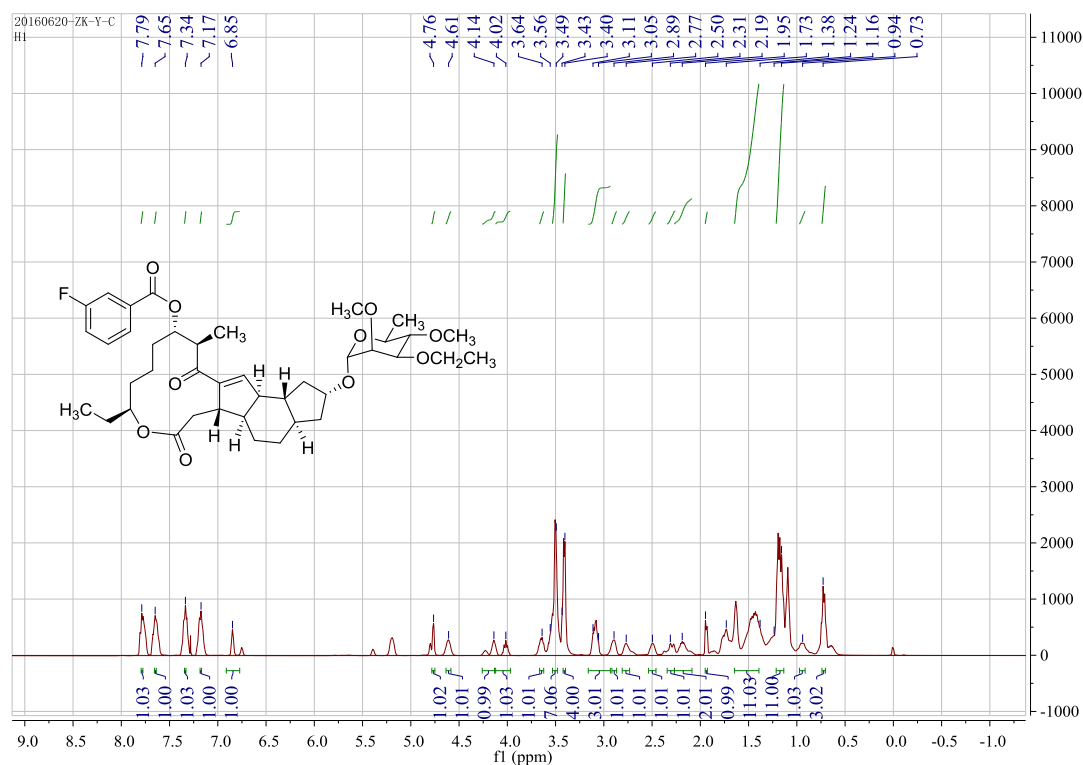

# <sup>13</sup>C NMR of **8d**

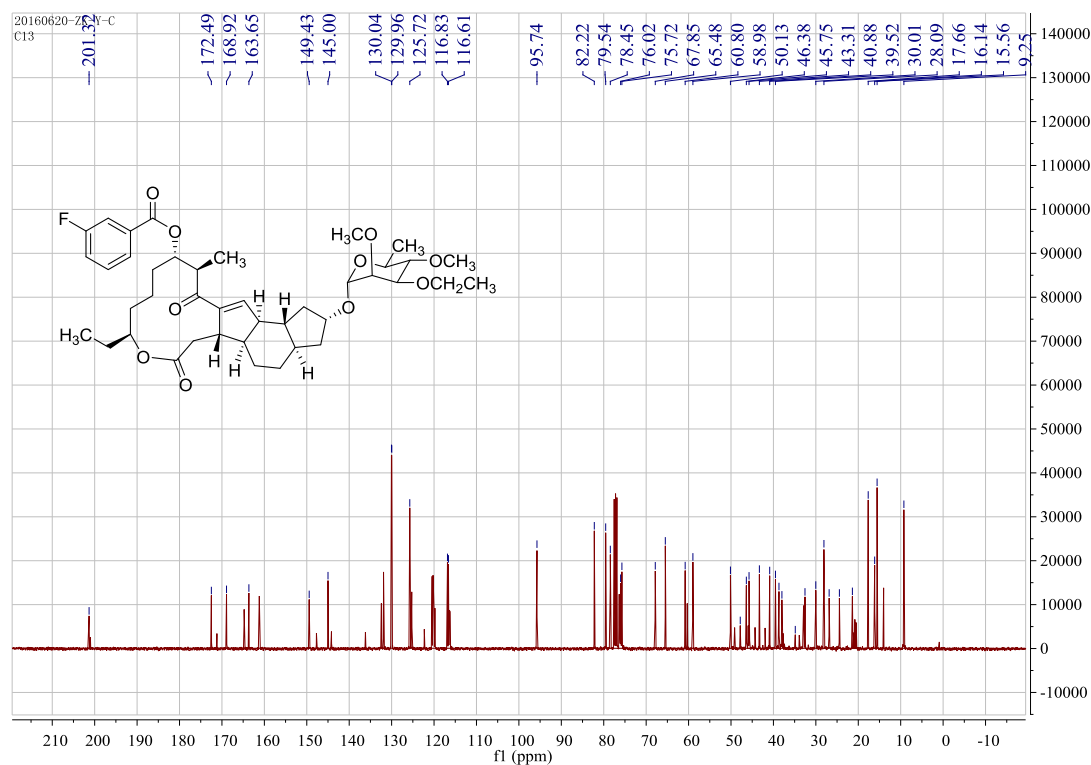



# <sup>1</sup>H NMR of **8e**

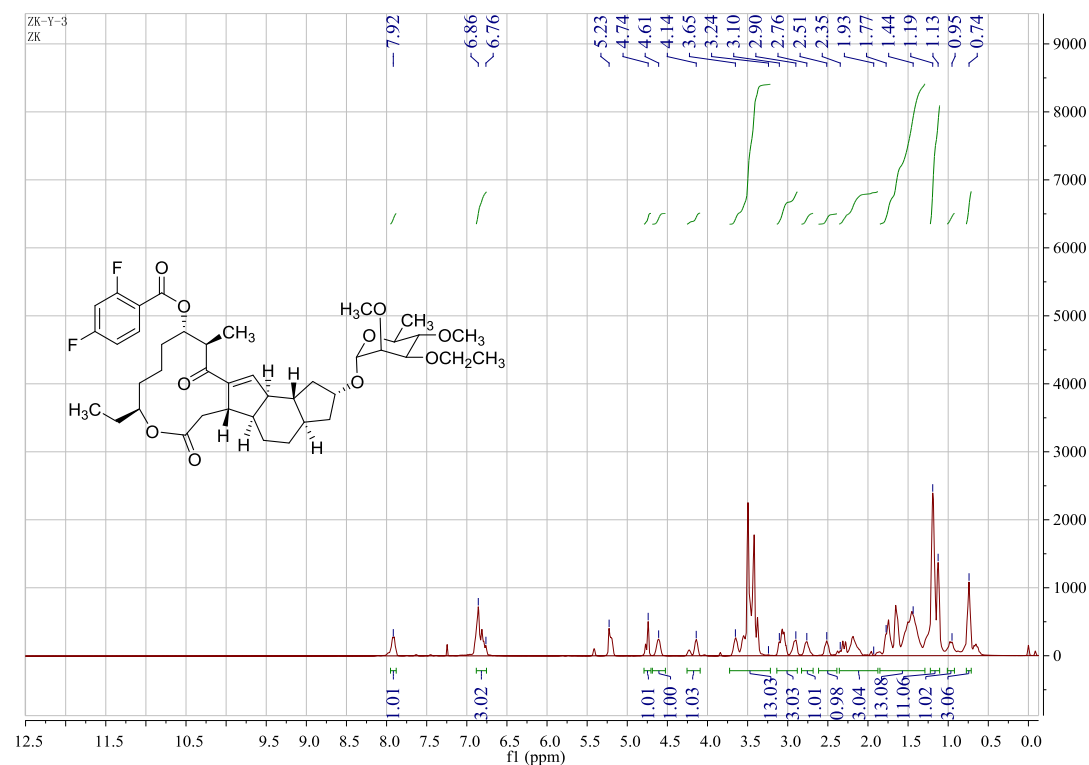

# <sup>13</sup>C NMR of **8e**

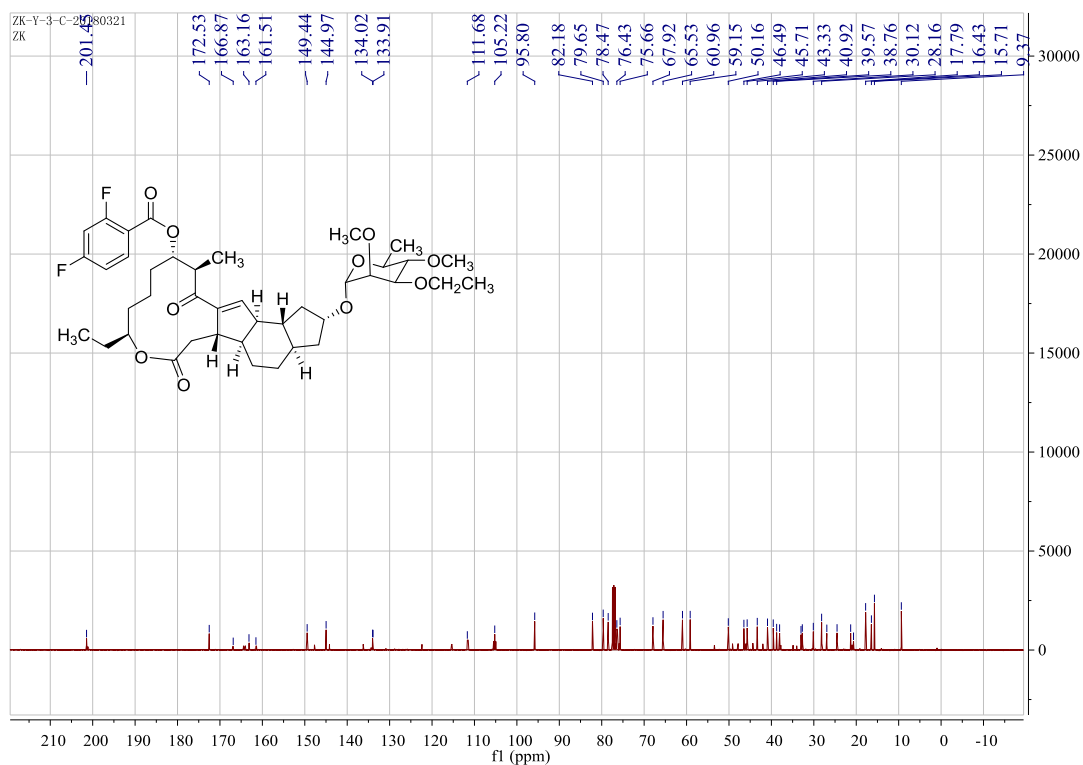

# <sup>1</sup>H NMR of **8f**

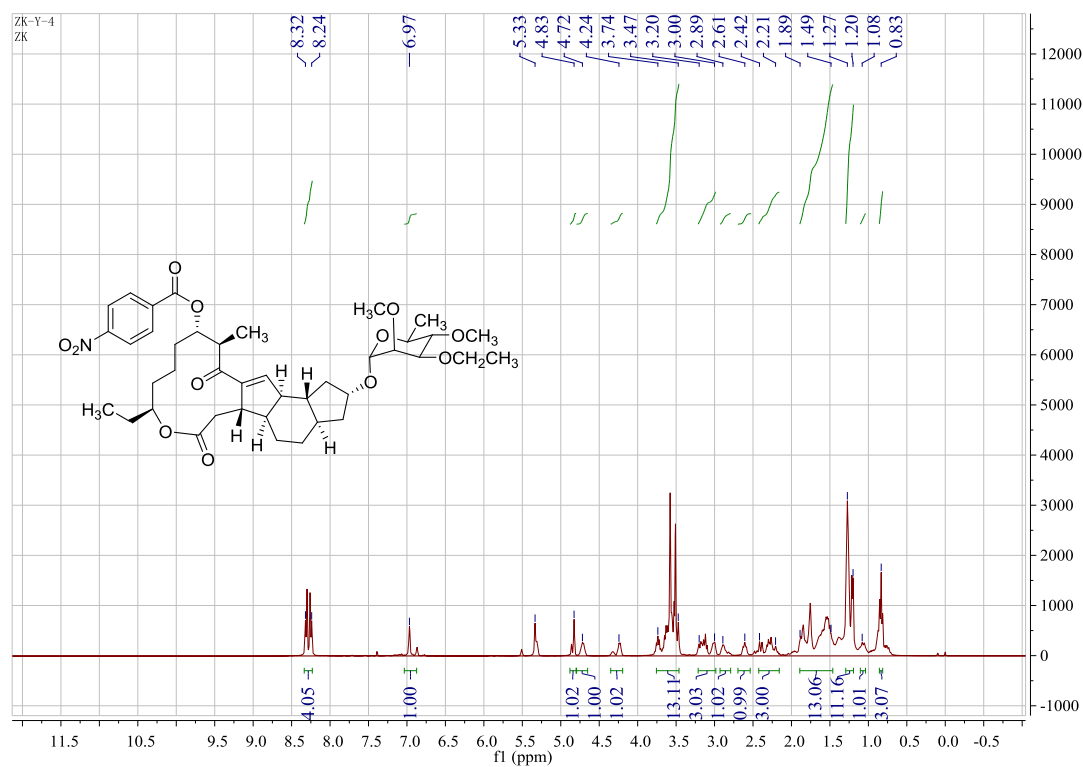

# <sup>13</sup>C NMR of **8f**

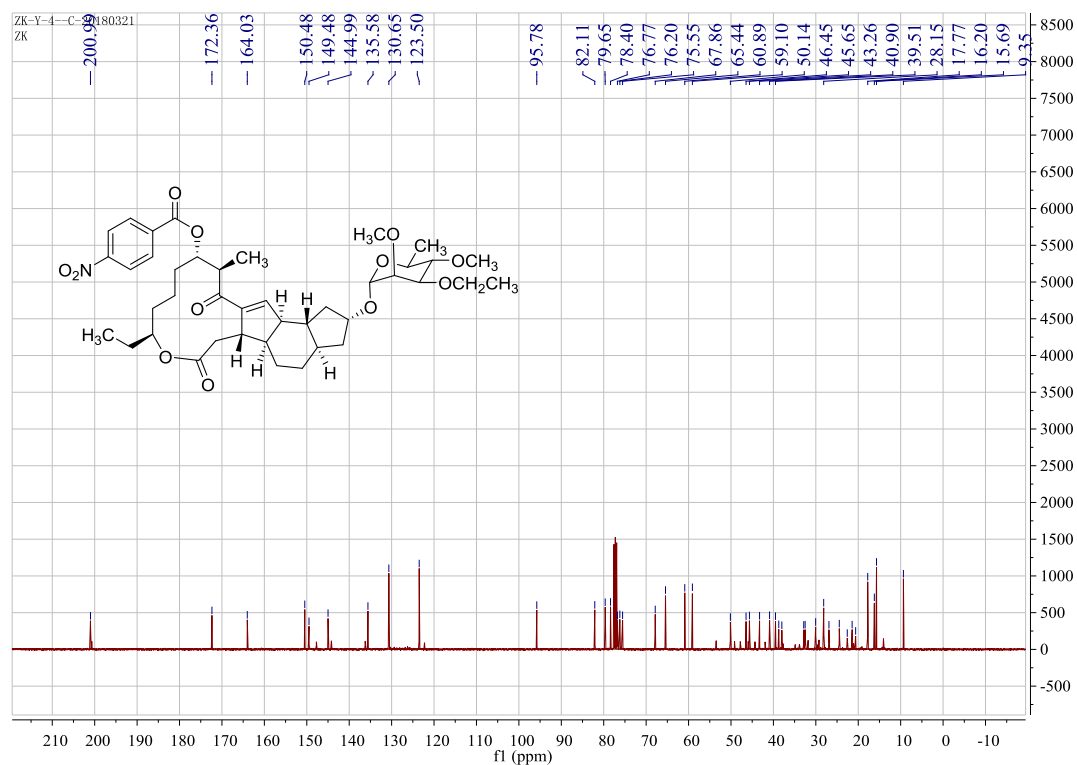

# <sup>1</sup>H NMR of **8g**

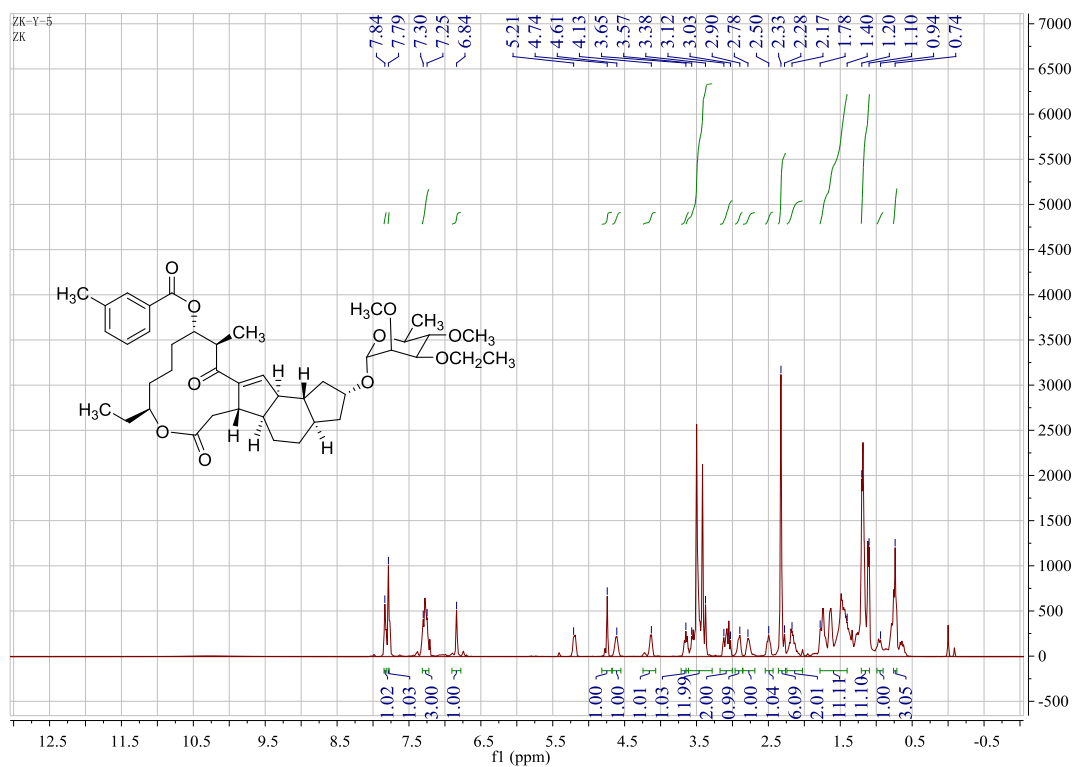

# <sup>13</sup>C NMR of **8g**

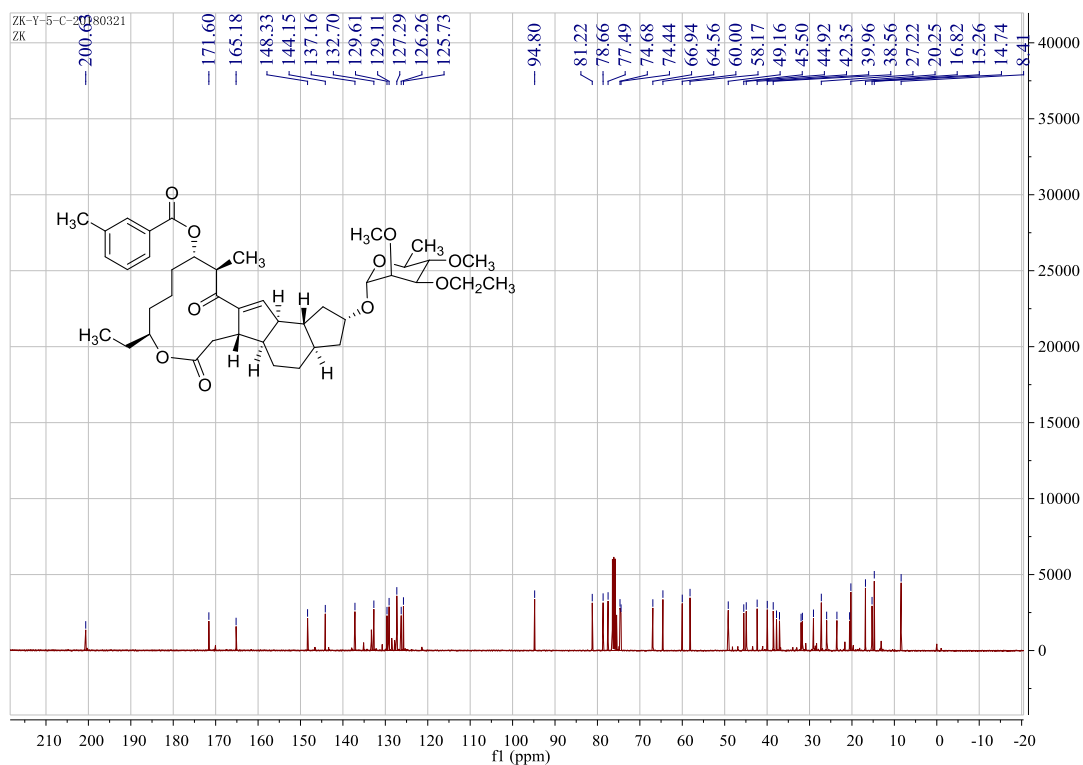

# <sup>1</sup>H NMR of **8h**

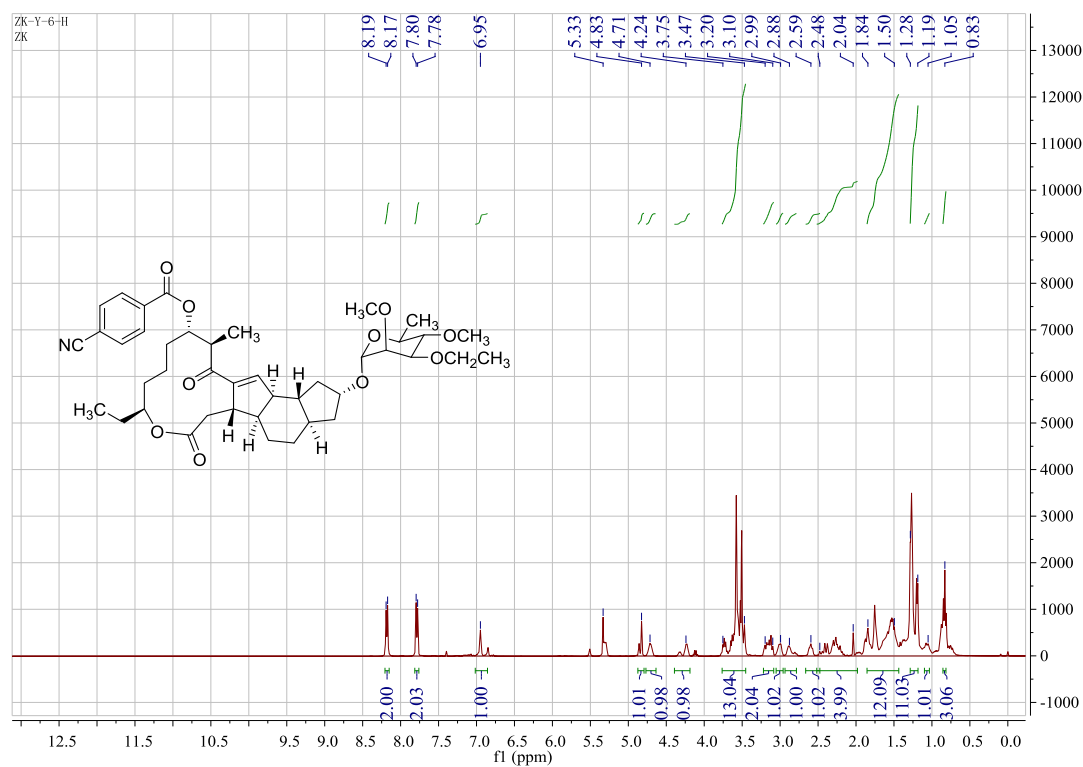

# <sup>13</sup>C NMR of **8h**

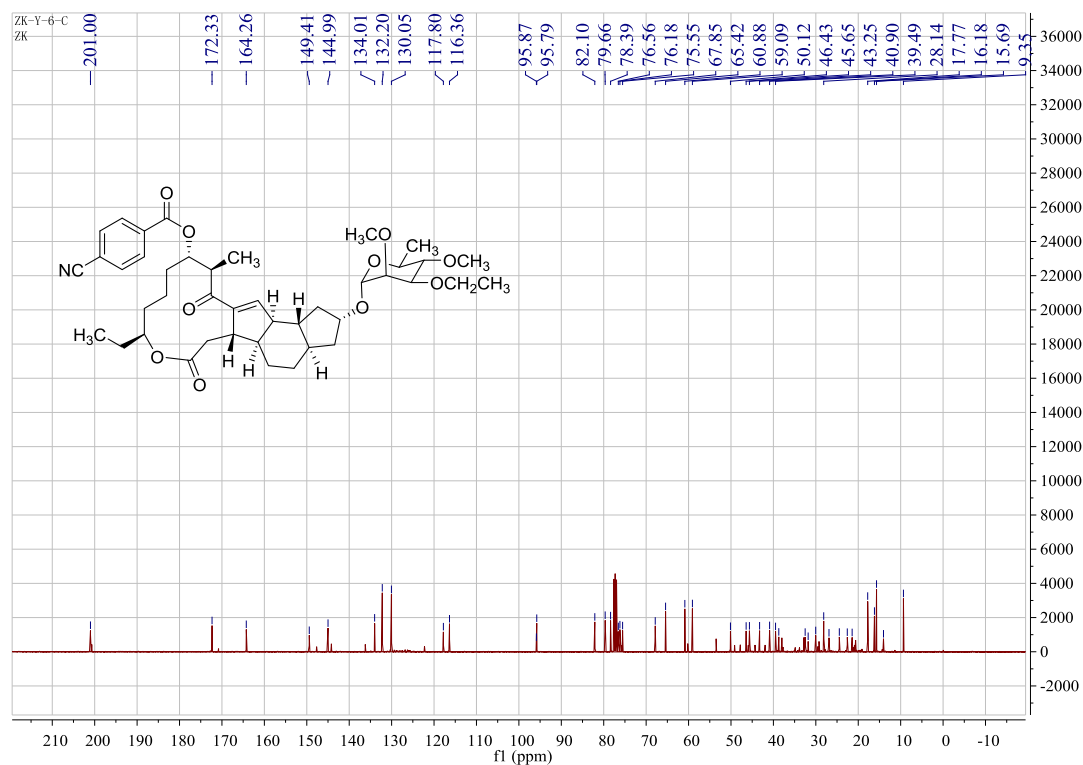

# <sup>1</sup>H NMR of **8i**

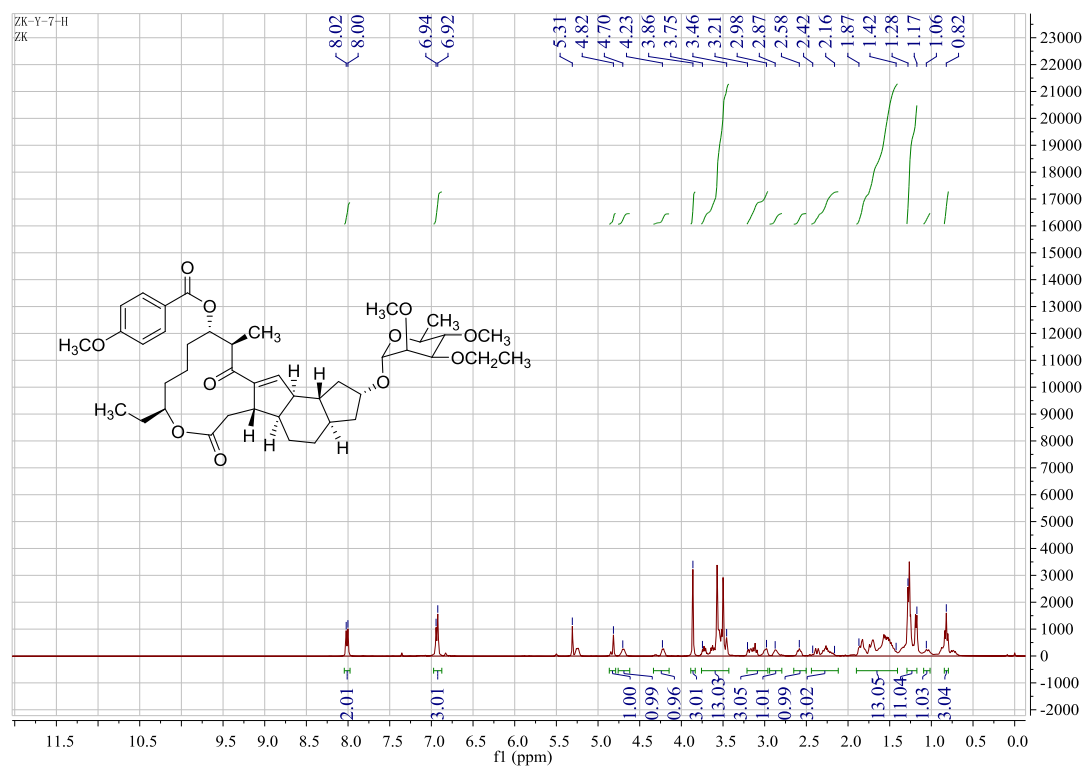

# <sup>13</sup>C NMR of **8i**

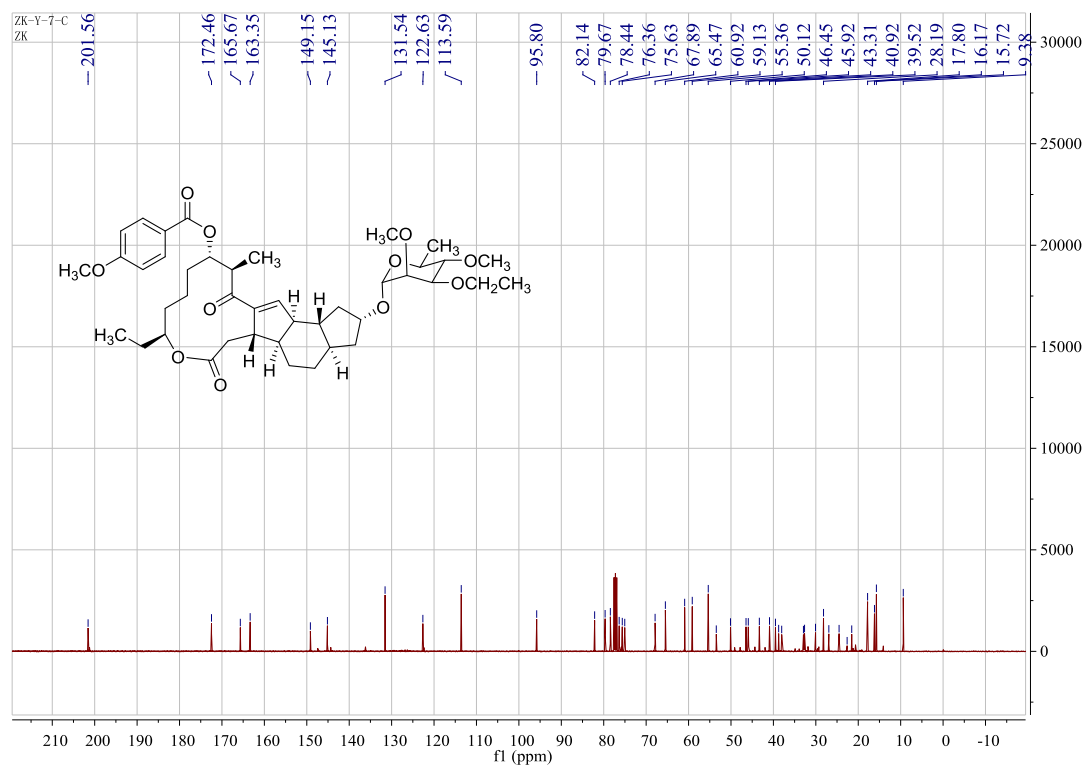

## MALDI,ZK-CC,20161223

## Analysis Info

Analysis Name D:\Data\MALDI\2016\1223\ZK-CC\_0\_E12\_000001.d  
Method MALDI\_P\_100-3000  
Sample Name  
Comment

Acquisition Date 12/23/2016 6:20:10 PM

Operator  
Instrument solariX

## Acquisition Parameter

|                       |            |                      |           |                       |                          |
|-----------------------|------------|----------------------|-----------|-----------------------|--------------------------|
| Acquisition Mode      | Single MS  | Acquired Scans       | 5         | Calibration Date      | Fri Dec 23 05:39:24 2016 |
| Polarity              | Positive   | No. of Cell Fills    | 1         | Data Acquisition Size | 2097152                  |
| Broadband Low Mass    | 202.1 m/z  | No. of Laser Shots   | 10        | Data Processing Size  | 4194304                  |
| Broadband High Mass   | 1300.0 m/z | Laser Power          | 28.4 lp   | Apodization           | Sine-Bell Multiplication |
| Source Accumulation   | 0.001 sec  | Laser Shot Frequency | 0.020 sec |                       |                          |
| Ion Accumulation Time | 1.000 sec  |                      |           |                       |                          |

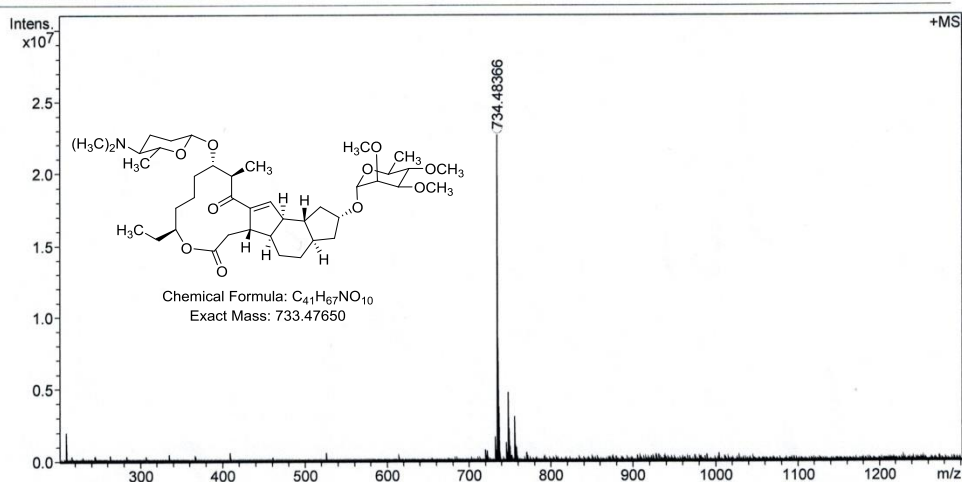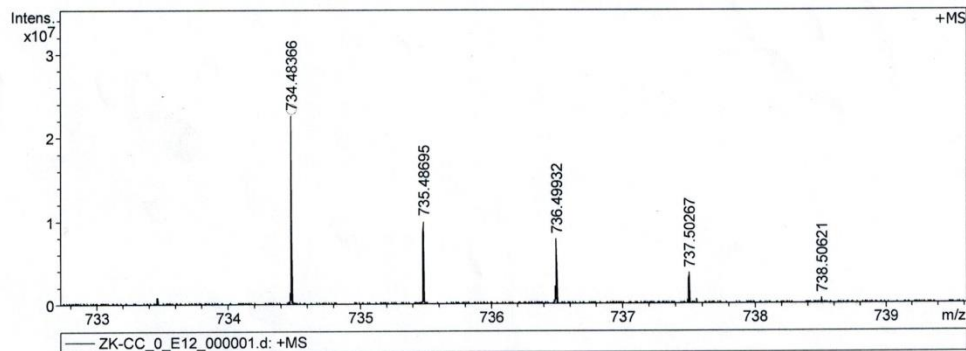

| Meas. m/z  | # | Ion Formula | Score  | m/z        | err [ppm] | Mean err [ppm] | mSigma | rdb | e <sup>-</sup> Conf | N-Rule |
|------------|---|-------------|--------|------------|-----------|----------------|--------|-----|---------------------|--------|
| 734.483663 | 1 | C41H68NO10  | 100.00 | 734.483774 | -0.2      | 0.1            | 14.7   | 8.5 | even                | ok     |

# MS of 2

## Acquisition Parameter

|                       |           |                      |           |                       |                          |
|-----------------------|-----------|----------------------|-----------|-----------------------|--------------------------|
| Acquisition Mode      | Single MS | Acquired Scans       | 3         | Calibration Date      | Fri Dec 9 06:41:47 2016  |
| Polarity              | Positive  | No. of Cell Fills    | 1         | Data Acquisition Size | 2097152                  |
| Broadband Low Mass    | 202.1 m/z | No. of Laser Shots   | 10        | Data Processing Size  | 4194304                  |
| Broadband High Mass   | 700.0 m/z | Laser Power          | 34.6 lp   | Apodization           | Sine-Bell Multiplication |
| Source Accumulation   | 0.001 sec | Laser Shot Frequency | 0.020 sec |                       |                          |
| Ion Accumulation Time | 0.300 sec |                      |           |                       |                          |

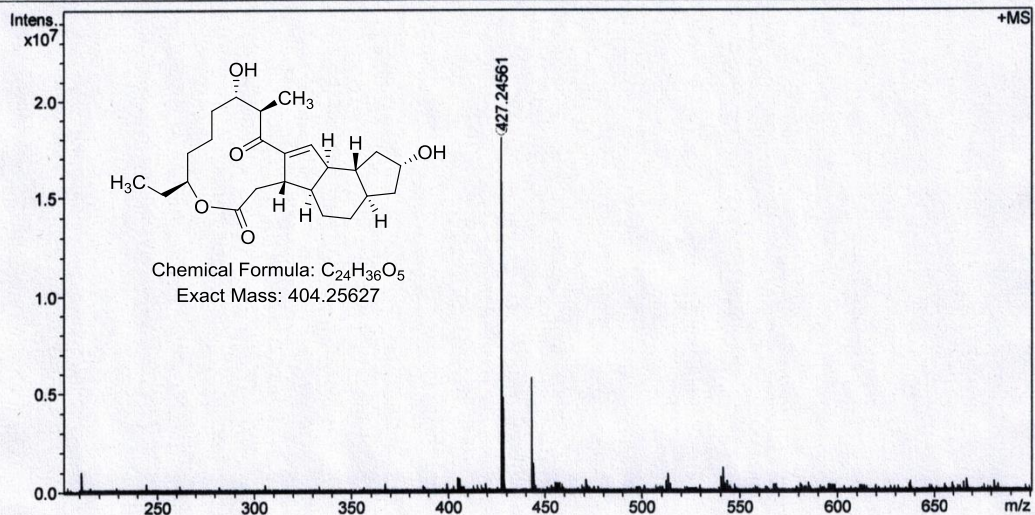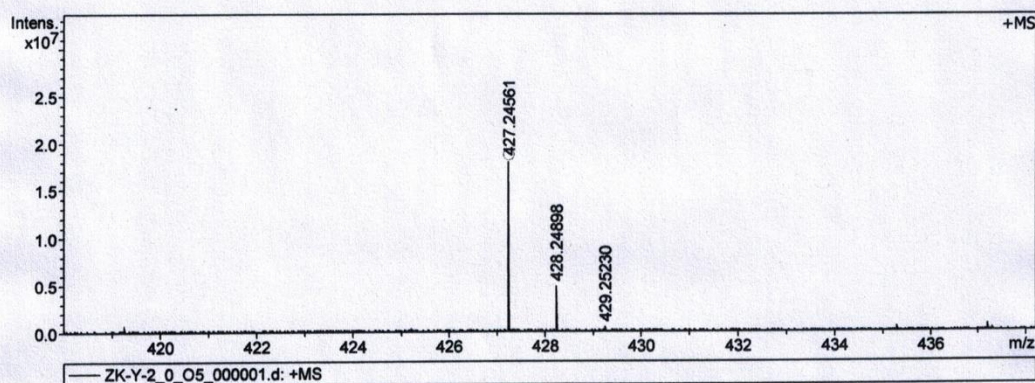

| Meas. m/z  | # | Ion Formula                                      | Score  | m/z        | err [ppm] | Mean err [ppm] | mSigma | rdB | e <sup>-</sup> Conf | N-Rule |
|------------|---|--------------------------------------------------|--------|------------|-----------|----------------|--------|-----|---------------------|--------|
| 427.245611 | 1 | C <sub>24</sub> H <sub>36</sub> NaO <sub>5</sub> | 100.00 | 427.245495 | 0.3       | -0.3           | 7.7    | 6.5 | even                | ok     |



# MS of 4

## Acquisition Parameter

|                       |            |                      |           |                       |                          |
|-----------------------|------------|----------------------|-----------|-----------------------|--------------------------|
| Acquisition Mode      | Single MS  | Acquired Scans       | 4         | Calibration Date      | Fri Dec 9 06:41:47 2016  |
| Polarity              | Positive   | No. of Cell Fills    | 1         | Data Acquisition Size | 2097152                  |
| Broadband Low Mass    | 202.1 m/z  | No. of Laser Shots   | 10        | Data Processing Size  | 4194304                  |
| Broadband High Mass   | 1500.0 m/z | Laser Power          | 34.6 lp   | Apodization           | Sine-Bell Multiplication |
| Source Accumulation   | 0.001 sec  | Laser Shot Frequency | 0.020 sec |                       |                          |
| Ion Accumulation Time | 0.300 sec  |                      |           |                       |                          |

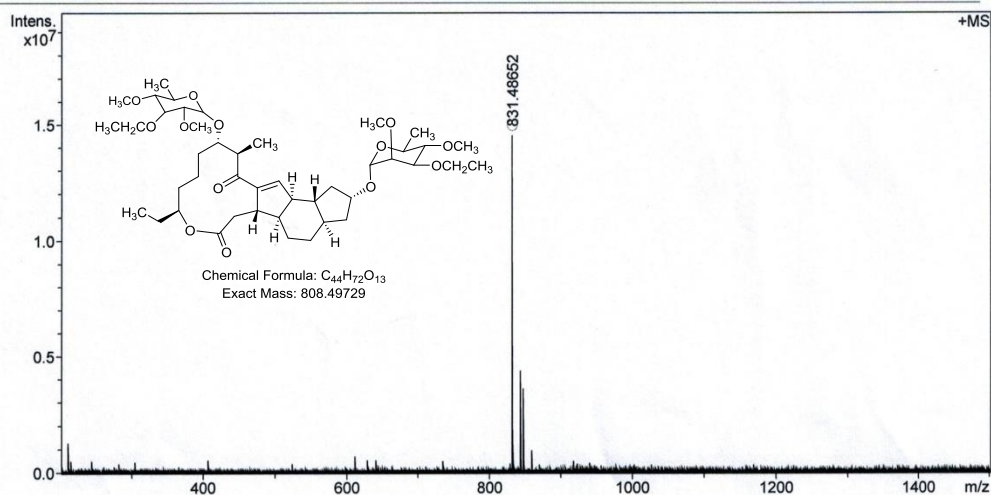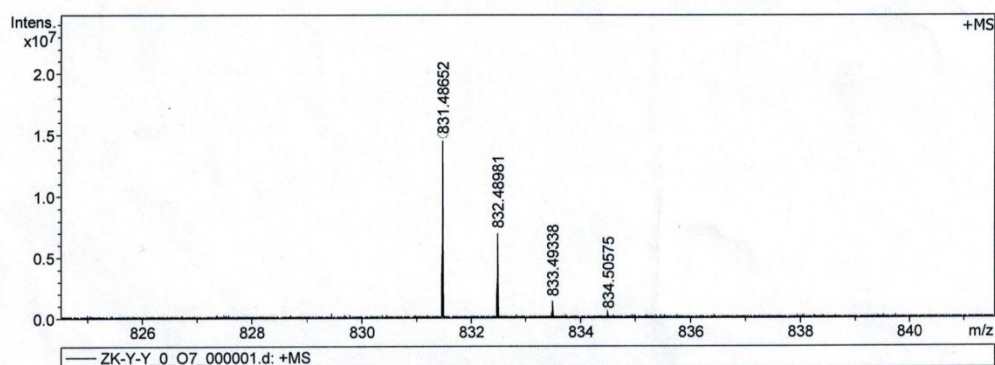

| Meas. m/z  | # | Ion Formula                                       | Score  | m/z        | err [ppm] | Mean err [ppm] | mSigma | rdb | e <sup>-</sup> Conf | N-Rule |
|------------|---|---------------------------------------------------|--------|------------|-----------|----------------|--------|-----|---------------------|--------|
| 831.486515 | 1 | C <sub>44</sub> H <sub>72</sub> NaO <sub>13</sub> | 100.00 | 831.486513 | 0.0       | -0.0           | 23.2   | 8.5 | even                | ok     |



# MS of 5

## Acquisition Parameter

|                       |            |                      |           |                       |                          |
|-----------------------|------------|----------------------|-----------|-----------------------|--------------------------|
| Acquisition Mode      | Single MS  | Acquired Scans       | 11        | Calibration Date      | Tue Jan 3 05:07:39 2017  |
| Polarity              | Positive   | No. of Cell Fills    | 1         | Data Acquisition Size | 2097152                  |
| Broadband Low Mass    | 202.1 m/z  | No. of Laser Shots   | 10        | Data Processing Size  | 4194304                  |
| Broadband High Mass   | 1000.0 m/z | Laser Power          | 35.2 lp   | Apodization           | Sine-Bell Multiplication |
| Source Accumulation   | 0.001 sec  | Laser Shot Frequency | 0.020 sec |                       |                          |
| Ion Accumulation Time | 0.300 sec  |                      |           |                       |                          |

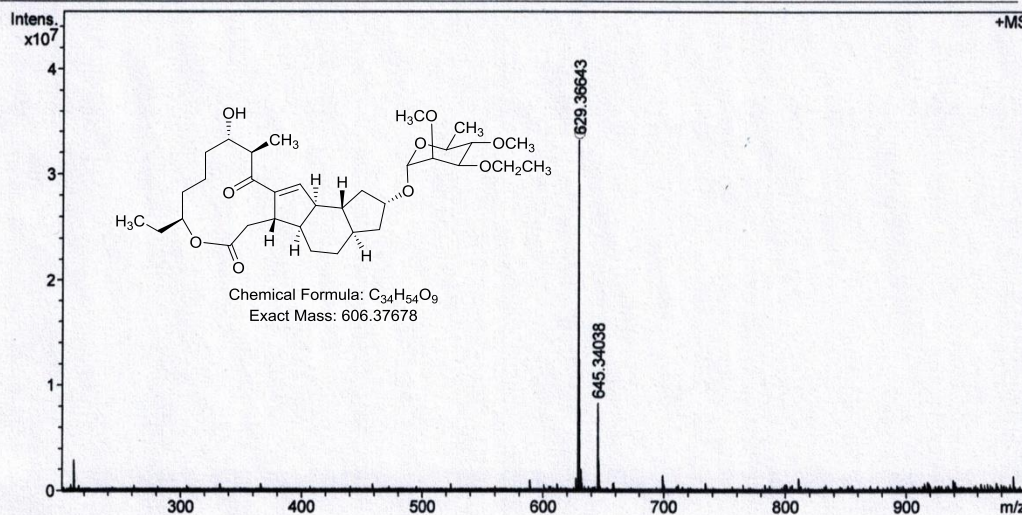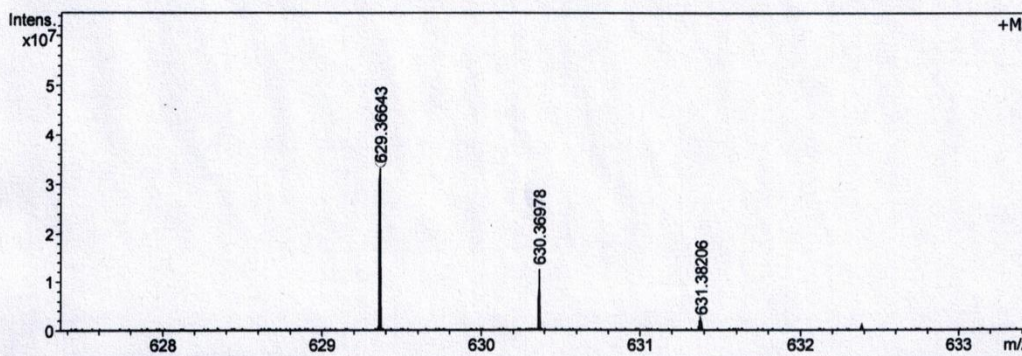

| Meas. m/z  | # | Ion Formula                                      | Score  | m/z        | err [ppm] | Mean err [ppm] | mSigma | rdb | e <sup>-</sup> Conf | N-Rule |
|------------|---|--------------------------------------------------|--------|------------|-----------|----------------|--------|-----|---------------------|--------|
| 629.366428 | 1 | C <sub>34</sub> H <sub>54</sub> NaO <sub>9</sub> | 100.00 | 629.366004 | -0.7      | -0.7           | 15.0   | 7.5 | even                | ok     |

# MS of spinetoram J

## MALDI,ZK-Y,20171010

### Analysis Info

Analysis Name D:\Data\MALDI\2017\1011\ZK-Y\_0\_N16\_000002.d  
Method MALDI\_P\_100-3000  
Sample Name MURU-N-ESI  
Comment

Acquisition Date 10/11/2017 5:24:05 PM

Operator

Instrument solariX

### Acquisition Parameter

Acquisition Mode Single MS  
Polarity Positive  
Broadband Low Mass 101.1 m/z  
Broadband High Mass 1450.0 m/z  
Source Accumulation 0.001 sec  
Ion Accumulation Time 0.300 sec  
Acquired Scans 17  
No. of Cell Fills 1  
No. of Laser Shots 10  
Laser Power 28.8 lp  
Laser Shot Frequency 0.020 sec

Calibration Date Wed Oct 11 05:04:55  
Data Acquisition Size 2097152  
Data Processing Size 4194304  
Apodization Sine-Bell Multiplication

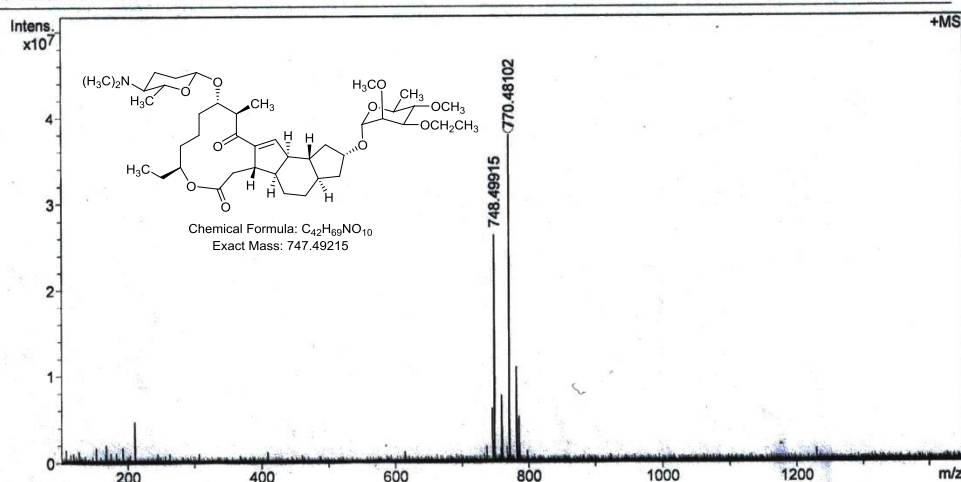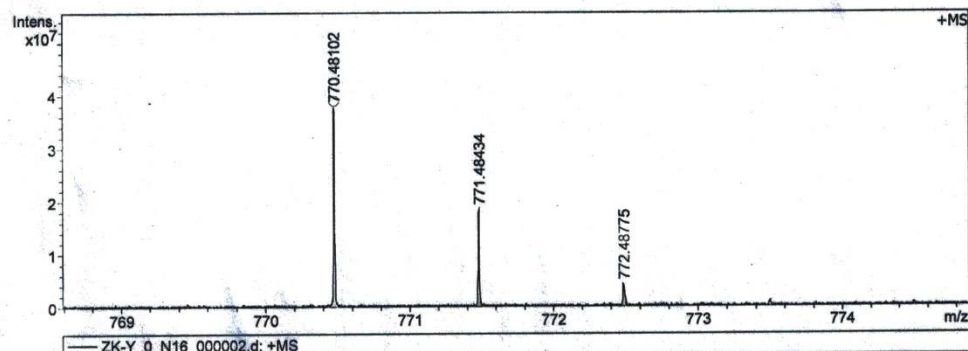

| Meas. m/z  | # | Ion Formula                                        | Score  | m/z        | err [ppm] | Mean err [ppm] | mSigma | rdb | e <sup>-</sup> Conf | N-Rule |
|------------|---|----------------------------------------------------|--------|------------|-----------|----------------|--------|-----|---------------------|--------|
| 770.481016 | 1 | C <sub>42</sub> H <sub>69</sub> NNaO <sub>10</sub> | 100.00 | 770.481368 | -0.5      | 0.4            | 16.2   | 8.5 | even                | ok     |

# MS of 7a

## Acquisition Parameter

|                       |            |                      |           |                       |                          |
|-----------------------|------------|----------------------|-----------|-----------------------|--------------------------|
| Acquisition Mode      | Single MS  | Acquired Scans       | 2         | Calibration Date      | Fri Jun 3 05:53:25 2016  |
| Polarity              | Positive   | No. of Cell Fills    | 1         | Data Acquisition Size | 2097152                  |
| Broadband Low Mass    | 202.1 m/z  | No. of Laser Shots   | 10        | Data Processing Size  | 4194304                  |
| Broadband High Mass   | 1300.0 m/z | Laser Power          | 28.2 lp   | Apodization           | Sine-Bell Multiplication |
| Source Accumulation   | 0.001 sec  | Laser Shot Frequency | 0.020 sec |                       |                          |
| Ion Accumulation Time | 0.800 sec  |                      |           |                       |                          |

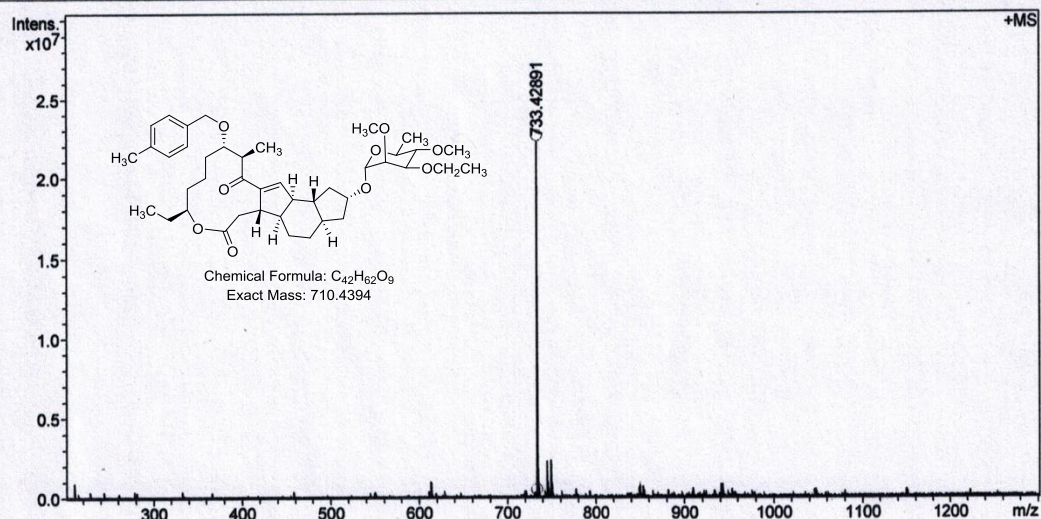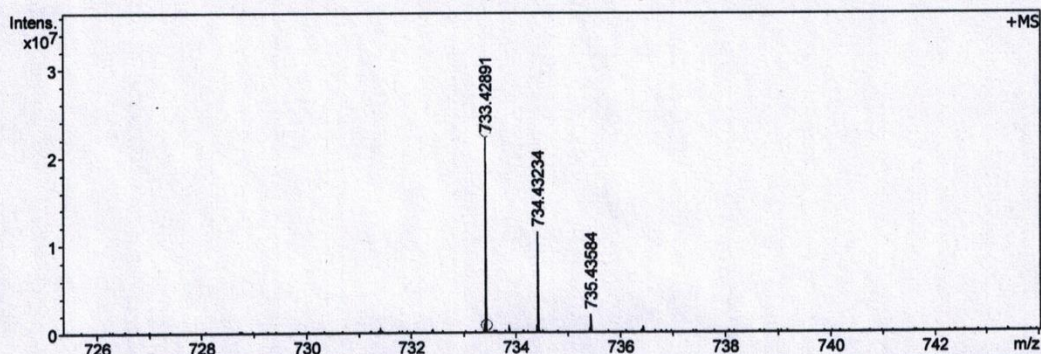

ZK-Y-H\_0\_06\_000001.d: +MS

| Meas. m/z  | # | Ion Formula  | Score  | m/z        | err [ppm] | Mean err [ppm] | mSigma | rdB  | e <sup>-</sup> Conf | N-Rule |
|------------|---|--------------|--------|------------|-----------|----------------|--------|------|---------------------|--------|
| 733.428914 | 1 | C42H62NaO9   | 100.00 | 733.428604 | 0.4       | -0.5           | 27.9   | 11.5 | even                | ok     |
| 733.444150 | 1 | C31H65N4O15  | n.a.   | 733.444094 | -0.1      |                | n.a.   | 1.5  | even                | ok     |
|            | 2 | C30H59N11O10 | n.a.   | 733.444089 | -0.1      |                | n.a.   | 7.0  | odd                 | ok     |
|            | 3 | C32H61N8O11  | n.a.   | 733.445431 | 1.7       |                | n.a.   | 6.5  | even                | ok     |
|            | 4 | C33H67NO16   | n.a.   | 733.445436 | 1.8       |                | n.a.   | 1.0  | odd                 | ok     |
|            | 5 | C29H63N7O14  | n.a.   | 733.442751 | -1.9      |                | n.a.   | 2.0  | odd                 | ok     |



# MS of **7b**

## Acquisition Parameter

|                       |            |                      |           |                       |                          |
|-----------------------|------------|----------------------|-----------|-----------------------|--------------------------|
| Acquisition Mode      | Single MS  | Acquired Scans       | 3         | Calibration Date      | Fri Jun 3 05:53:25 2016  |
| Polarity              | Positive   | No. of Cell Fills    | 1         | Data Acquisition Size | 2097152                  |
| Broadband Low Mass    | 202.1 m/z  | No. of Laser Shots   | 10        | Data Processing Size  | 4194304                  |
| Broadband High Mass   | 1300.0 m/z | Laser Power          | 28.2 lp   | Apodization           | Sine-Bell Multiplication |
| Source Accumulation   | 0.001 sec  | Laser Shot Frequency | 0.020 sec |                       |                          |
| Ion Accumulation Time | 0.800 sec  |                      |           |                       |                          |

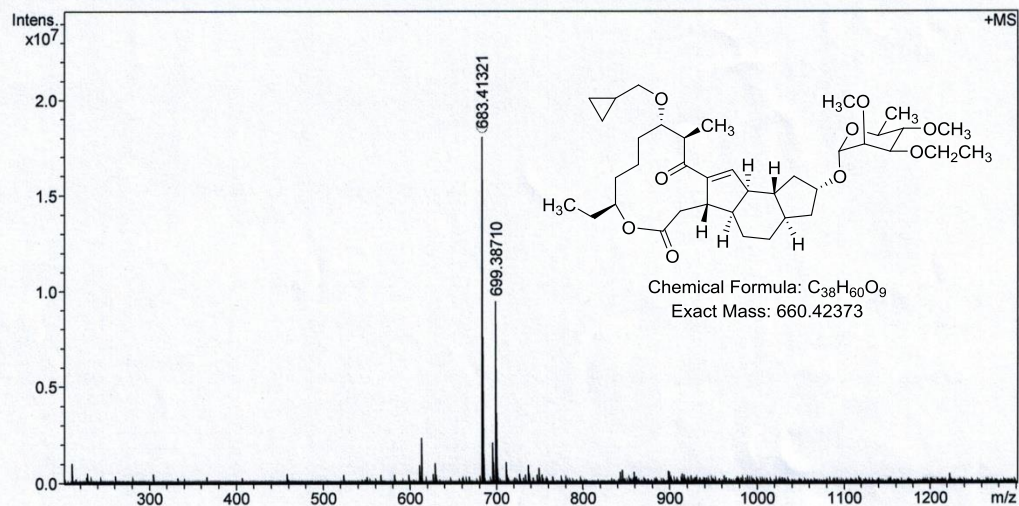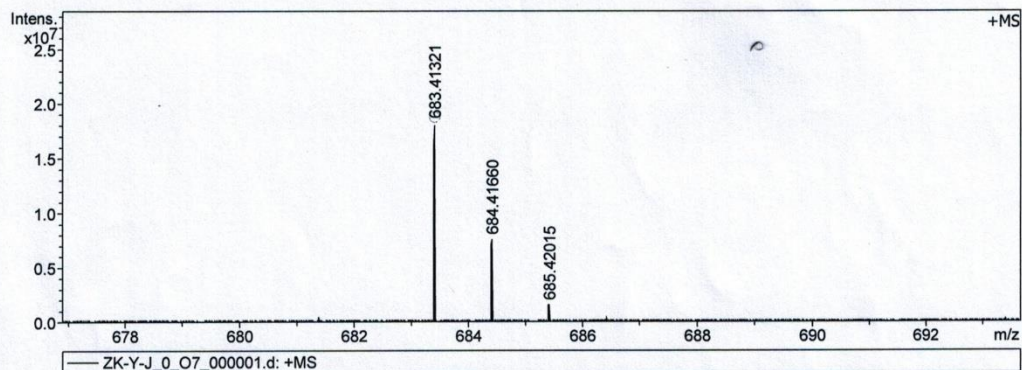

| Meas. $m/z$ | # | Ion Formula                                      | Score  | $m/z$      | err [ppm] | Mean err [ppm] | mSigma | rdb | e <sup>-</sup> Conf | N-Rule |
|-------------|---|--------------------------------------------------|--------|------------|-----------|----------------|--------|-----|---------------------|--------|
| 683.413206  | 1 | C <sub>38</sub> H <sub>60</sub> NaO <sub>9</sub> | 100.00 | 683.412954 | -0.4      | -0.4           | 13.9   | 8.5 | even                | ok     |

# MS of 7c

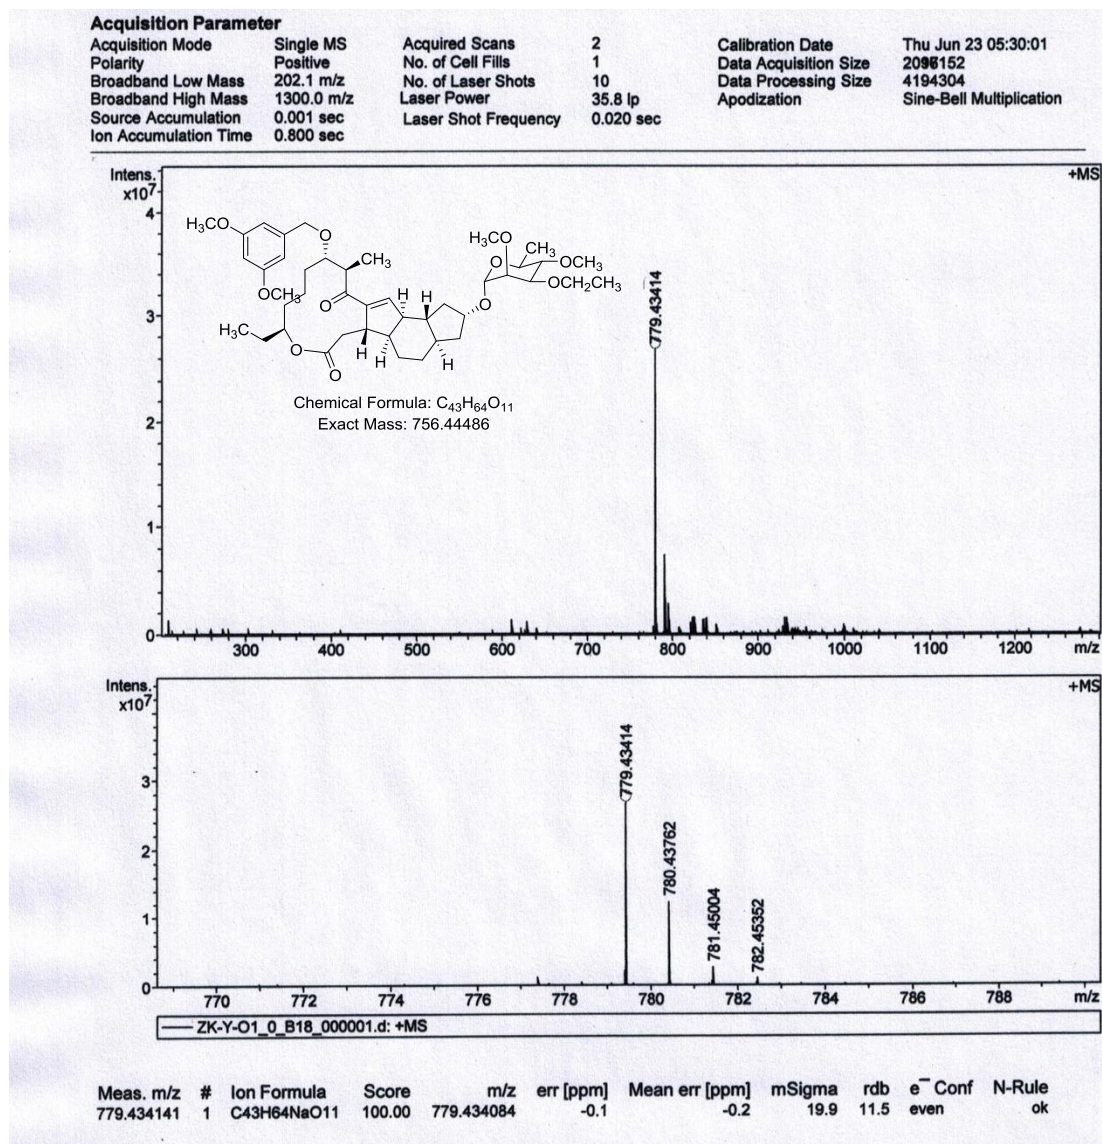



# MS of 7d

## Acquisition Parameter

|                       |            |                      |           |                       |                          |
|-----------------------|------------|----------------------|-----------|-----------------------|--------------------------|
| Acquisition Mode      | Single MS  | Acquired Scans       | 3         | Calibration Date      | Thu Jun 23 05:30:01      |
| Polarity              | Positive   | No. of Cell Fills    | 1         | Data Acquisition Size | 2096152                  |
| Broadband Low Mass    | 202.1 m/z  | No. of Laser Shots   | 10        | Data Processing Size  | 4194304                  |
| Broadband High Mass   | 1300.0 m/z | Laser Power          | 31.4 lp   | Apodization           | Sine-Bell Multiplication |
| Source Accumulation   | 0.001 sec  | Laser Shot Frequency | 0.020 sec |                       |                          |
| Ion Accumulation Time | 0.800 sec  |                      |           |                       |                          |

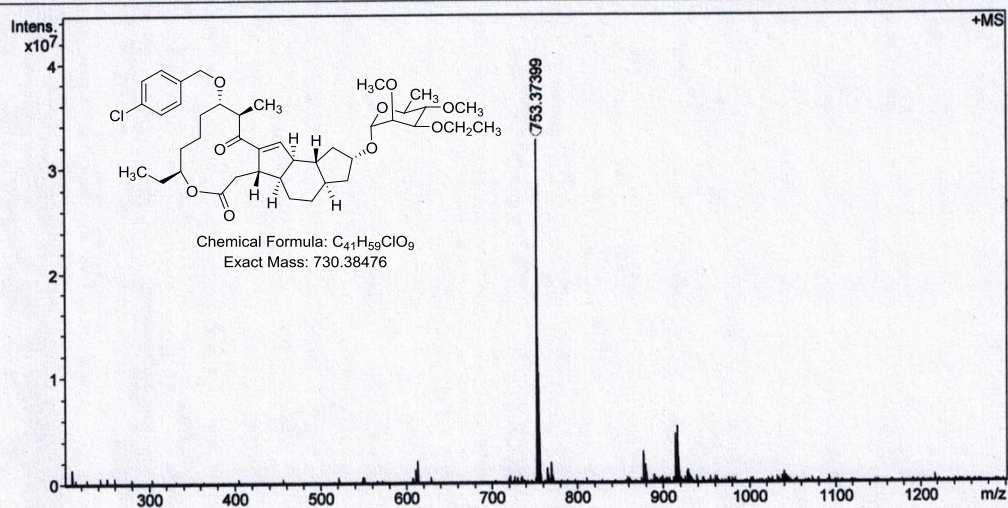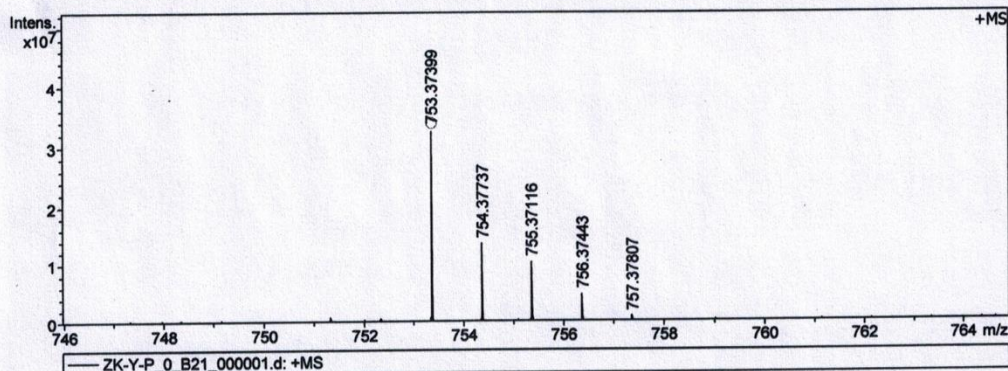

| Meas. m/z  | # | Ion Formula                                        | Score  | m/z        | err [ppm] | Mean err [ppm] | mSigma | rdb  | e <sup>-</sup> Conf | N-Rule |
|------------|---|----------------------------------------------------|--------|------------|-----------|----------------|--------|------|---------------------|--------|
| 753.373992 | 1 | C <sub>41</sub> H <sub>59</sub> ClNaO <sub>9</sub> | 100.00 | 753.373982 | -0.0      | 0.7            | 53.4   | 11.5 | even                | ok     |

# MS of 7e

## Acquisition Parameter

|                       |            |                      |           |                       |                          |
|-----------------------|------------|----------------------|-----------|-----------------------|--------------------------|
| Acquisition Mode      | Single MS  | Acquired Scans       | 5         | Calibration Date      | Thu Jun 23 05:30:01      |
| Polarity              | Positive   | No. of Cell Fills    | 1         | Data Acquisition Size | 2096152                  |
| Broadband Low Mass    | 202.1 m/z  | No. of Laser Shots   | 10        | Data Processing Size  | 4194304                  |
| Broadband High Mass   | 1300.0 m/z | Laser Power          | 31.4 lp   | Apodization           | Sine-Bell Multiplication |
| Source Accumulation   | 0.001 sec  | Laser Shot Frequency | 0.020 sec |                       |                          |
| Ion Accumulation Time | 0.800 sec  |                      |           |                       |                          |

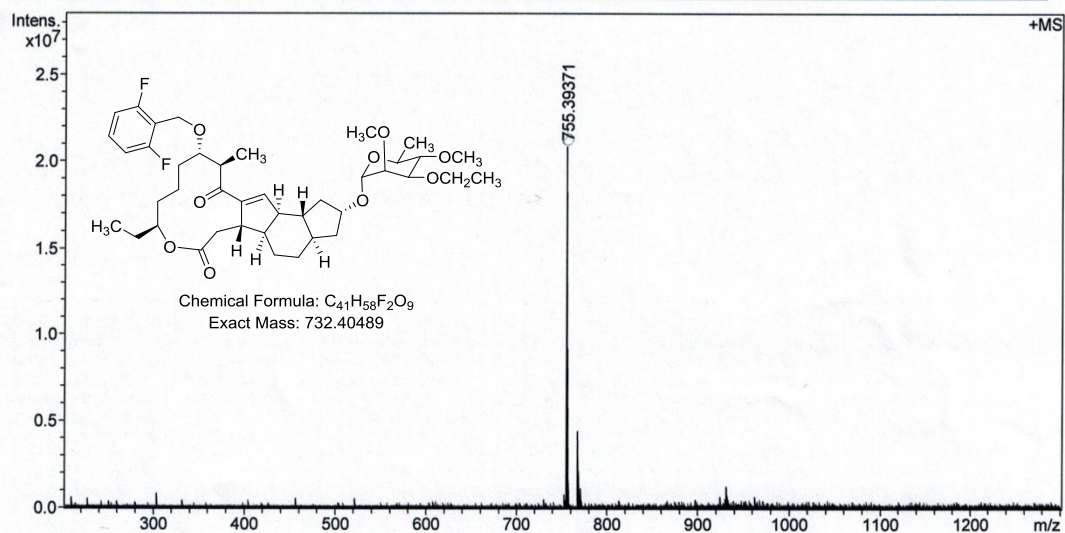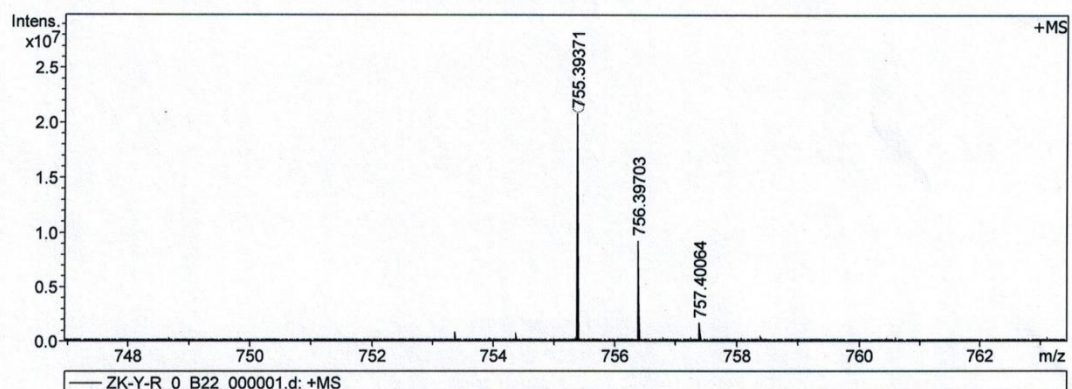

| Meas. m/z  | # | Ion Formula                                                     | Score  | m/z        | err [ppm] | Mean err [ppm] | mSigma | rdb  | e <sup>-</sup> Conf | N-Rule |
|------------|---|-----------------------------------------------------------------|--------|------------|-----------|----------------|--------|------|---------------------|--------|
| 755.393714 | 1 | C <sub>41</sub> H <sub>58</sub> F <sub>2</sub> NaO <sub>9</sub> | 100.00 | 755.394111 | -0.5      | 0.5            | 18.3   | 11.5 | even                | ok     |

# MS of 7f

## Acquisition Parameter

|                       |            |                      |           |                       |                          |
|-----------------------|------------|----------------------|-----------|-----------------------|--------------------------|
| Acquisition Mode      | Single MS  | Acquired Scans       | 5         | Calibration Date      | Thu Jun 23 05:30:01      |
| Polarity              | Positive   | No. of Cell Fills    | 1         | Data Acquisition Size | 2098152                  |
| Broadband Low Mass    | 202.1 m/z  | No. of Laser Shots   | 10        | Data Processing Size  | 4194304                  |
| Broadband High Mass   | 1300.0 m/z | Laser Power          | 37.0 lp   | Apodization           | Sine-Bell Multiplication |
| Source Accumulation   | 0.001 sec  | Laser Shot Frequency | 0.020 sec |                       |                          |
| Ion Accumulation Time | 0.800 sec  |                      |           |                       |                          |

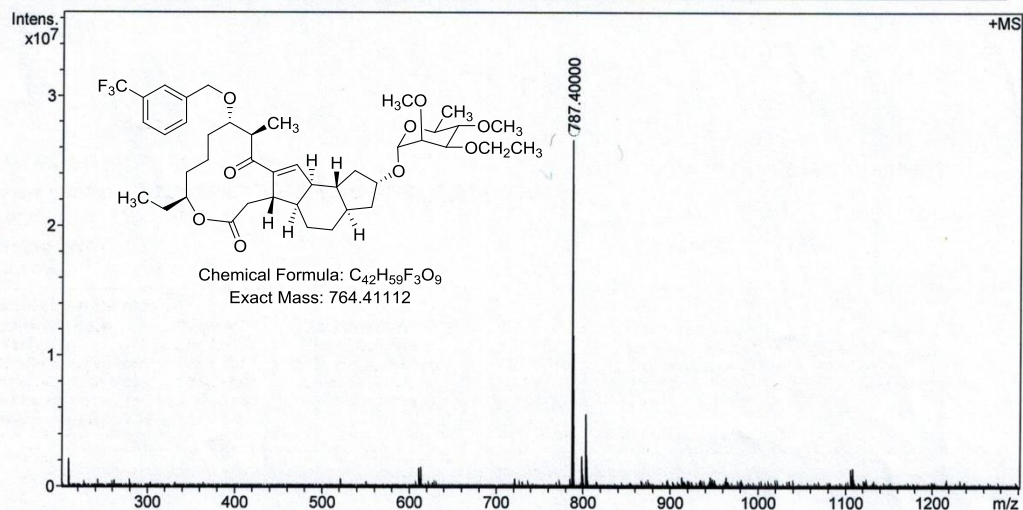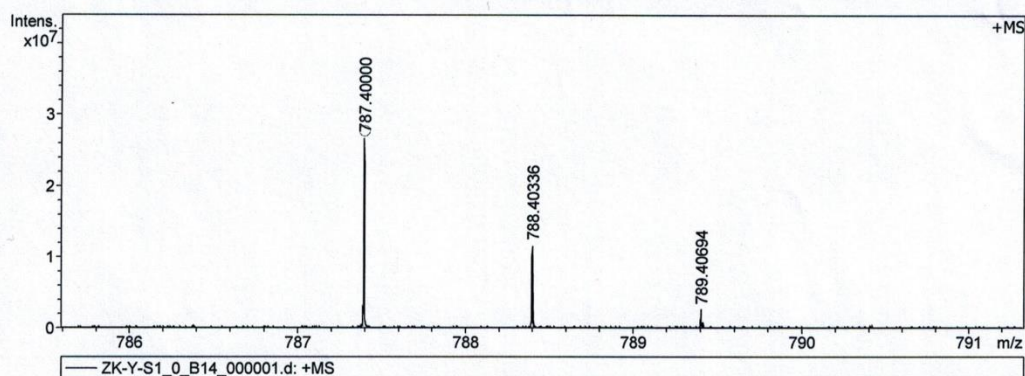

| Meas. m/z  | # | Ion Formula  | Score  | m/z        | err [ppm] | Mean err [ppm] | mSigma | rdb  | e <sup>-</sup> Conf | N-Rule |
|------------|---|--------------|--------|------------|-----------|----------------|--------|------|---------------------|--------|
| 787.400000 | 1 | C42H59F3NaO9 | 100.00 | 787.400339 | -0.4      | 0.4            | 17.9   | 11.5 | even                | ok     |



# MS of 7g

## Acquisition Parameter

|                       |            |                      |           |                       |                          |
|-----------------------|------------|----------------------|-----------|-----------------------|--------------------------|
| Acquisition Mode      | Single MS  | Acquired Scans       | 5         | Calibration Date      | Fri Jun 3 05:53:25 2016  |
| Polarity              | Positive   | No. of Cell Fills    | 1         | Data Acquisition Size | 2097152                  |
| Broadband Low Mass    | 202.1 m/z  | No. of Laser Shots   | 10        | Data Processing Size  | 4194304                  |
| Broadband High Mass   | 1300.0 m/z | Laser Power          | 28.2 lp   | Apodization           | Sine-Bell Multiplication |
| Source Accumulation   | 0.001 sec  | Laser Shot Frequency | 0.020 sec |                       |                          |
| Ion Accumulation Time | 0.800 sec  |                      |           |                       |                          |

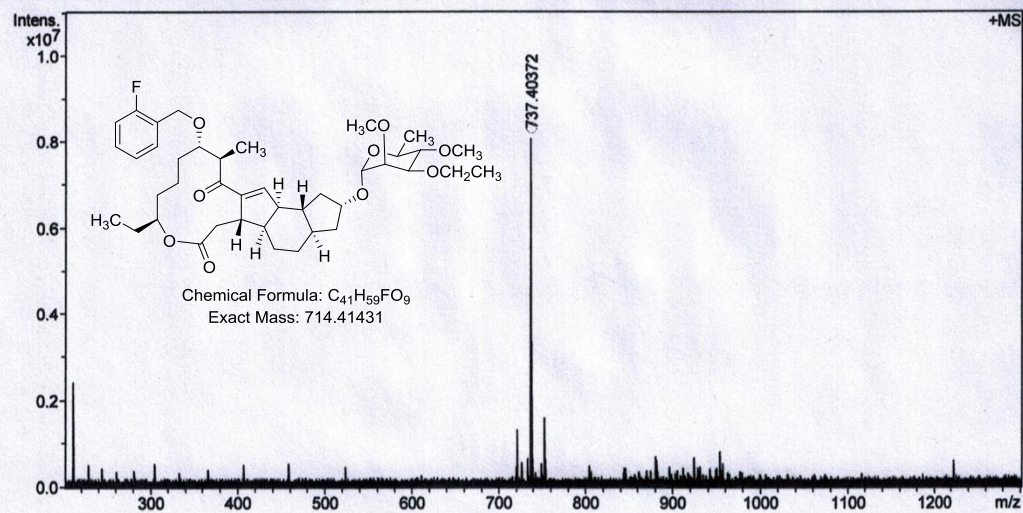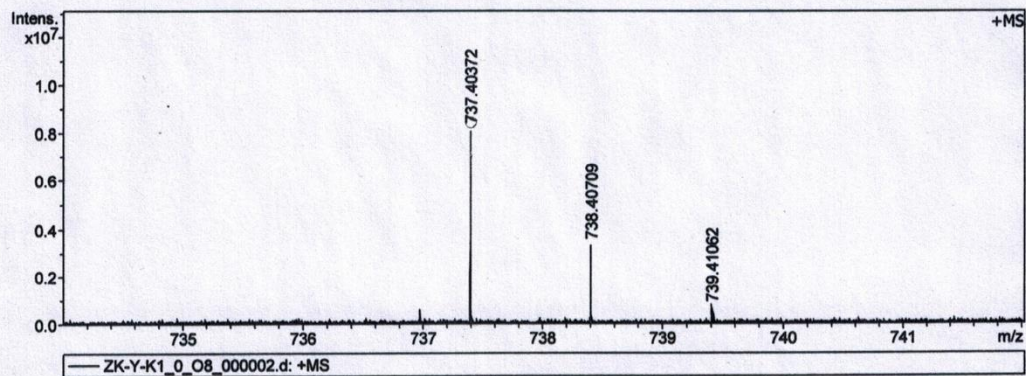

| Meas. m/z  | # | Ion Formula                                       | Score  | m/z        | err [ppm] | Mean err [ppm] | mSigma | rdb  | e <sup>-</sup> Conf | N-Rule |
|------------|---|---------------------------------------------------|--------|------------|-----------|----------------|--------|------|---------------------|--------|
| 737.403716 | 1 | C <sub>41</sub> H <sub>59</sub> FN <sub>9</sub> O | 100.00 | 737.403532 | -0.2      | -0.3           | 25.9   | 11.5 | even                | ok     |

# MS of 7h

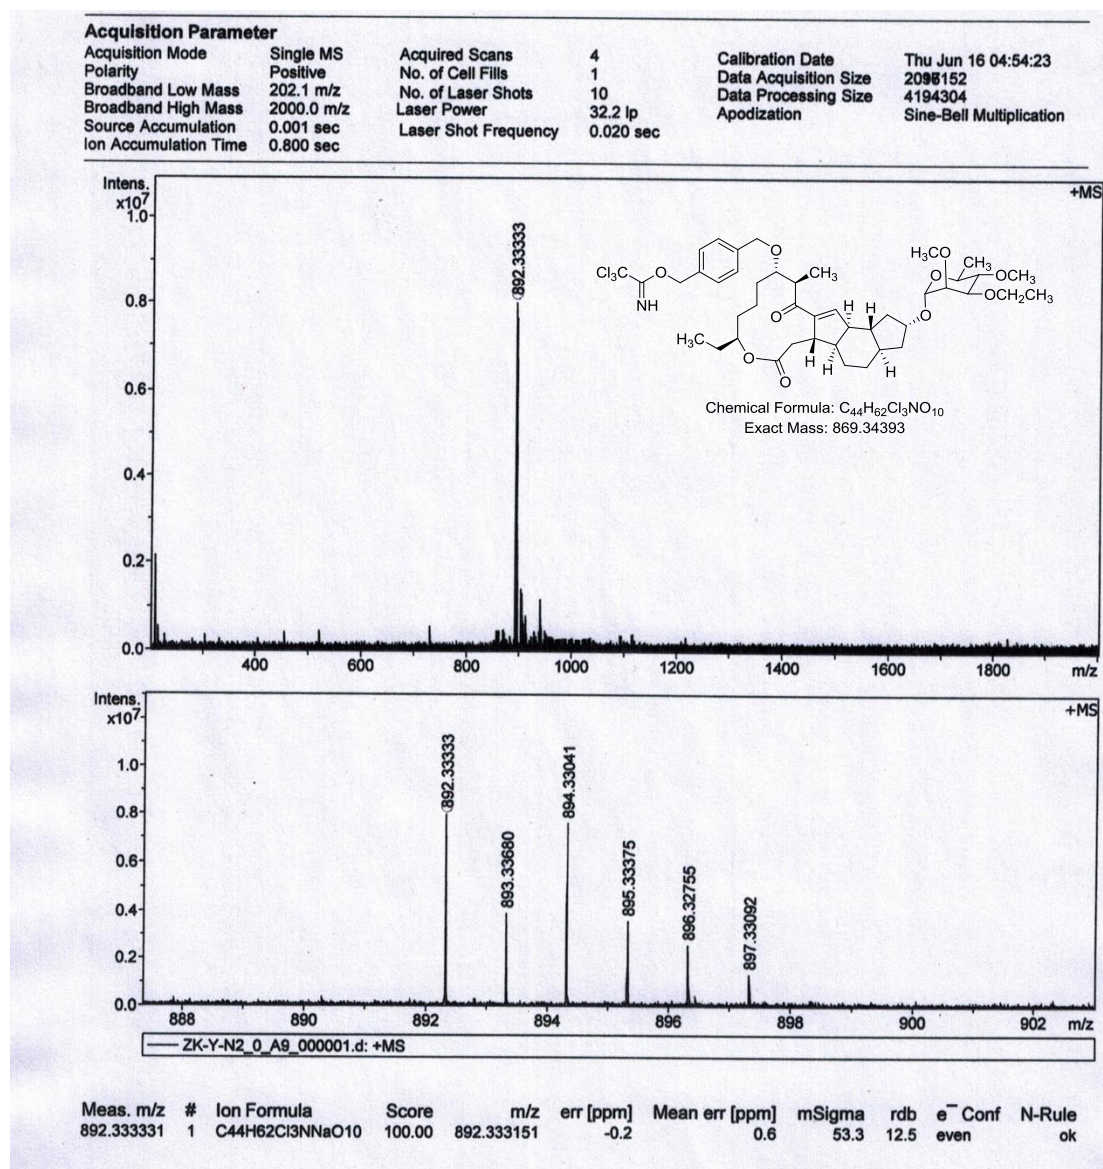



# MS of 7i

## Acquisition Parameter

|                       |            |                      |           |                       |                          |
|-----------------------|------------|----------------------|-----------|-----------------------|--------------------------|
| Acquisition Mode      | Single MS  | Acquired Scans       | 5         | Calibration Date      | Fri Jun 3 05:53:25 2016  |
| Polarity              | Positive   | No. of Cell Fills    | 1         | Data Acquisition Size | 2097152                  |
| Broadband Low Mass    | 202.1 m/z  | No. of Laser Shots   | 10        | Data Processing Size  | 4194304                  |
| Broadband High Mass   | 1300.0 m/z | Laser Power          | 28.2 lp   | Apodization           | Sine-Bell Multiplication |
| Source Accumulation   | 0.001 sec  | Laser Shot Frequency | 0.020 sec |                       |                          |
| Ion Accumulation Time | 0.800 sec  |                      |           |                       |                          |

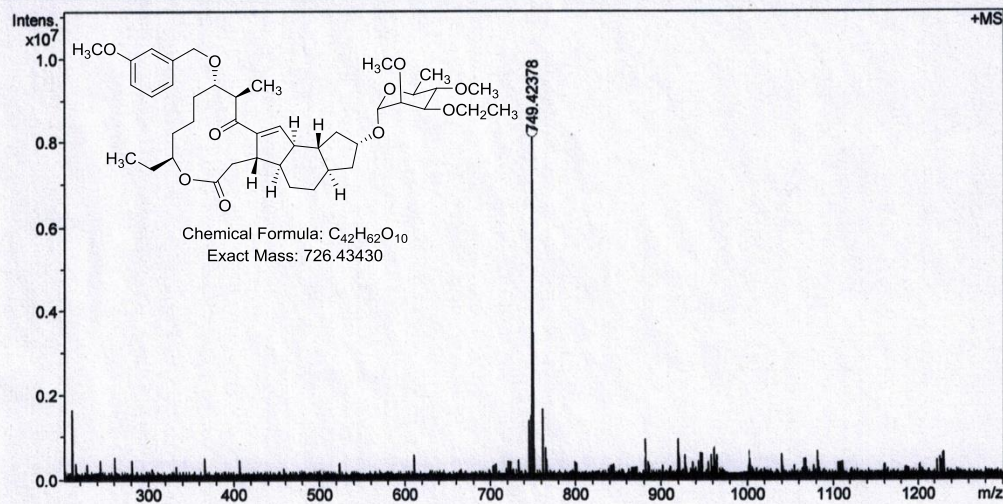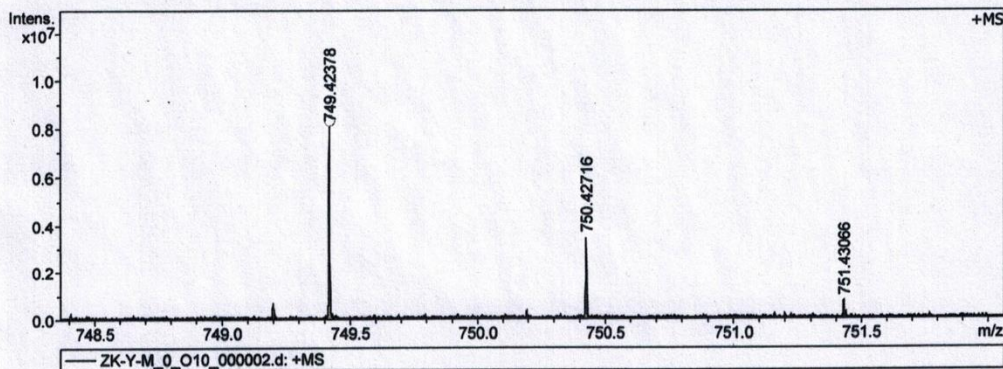

| Meas. m/z  | # | Ion Formula                                       | Score  | m/z        | err [ppm] | Mean err [ppm] | mSigma | rdb  | e <sup>-</sup> | Conf | N-Rule |
|------------|---|---------------------------------------------------|--------|------------|-----------|----------------|--------|------|----------------|------|--------|
| 749.423777 | 1 | C <sub>42</sub> H <sub>62</sub> NaO <sub>10</sub> | 100.00 | 749.423519 | 0.3       | -0.4           | 23.0   | 11.5 | even           |      | ok     |

# MS of 7j

## Acquisition Parameter

|                       |            |                      |           |                       |                          |
|-----------------------|------------|----------------------|-----------|-----------------------|--------------------------|
| Acquisition Mode      | Single MS  | Acquired Scans       | 2         | Calibration Date      | Tue Nov 22 04:41:09      |
| Polarity              | Positive   | No. of Cell Fills    | 1         | Data Acquisition Size | 2096152                  |
| Broadband Low Mass    | 202.1 m/z  | No. of Laser Shots   | 10        | Data Processing Size  | 4194304                  |
| Broadband High Mass   | 2400.0 m/z | Laser Power          | 41.4 lp   | Apodization           | Sine-Bell Multiplication |
| Source Accumulation   | 0.001 sec  | Laser Shot Frequency | 0.020 sec |                       |                          |
| Ion Accumulation Time | 0.300 sec  |                      |           |                       |                          |

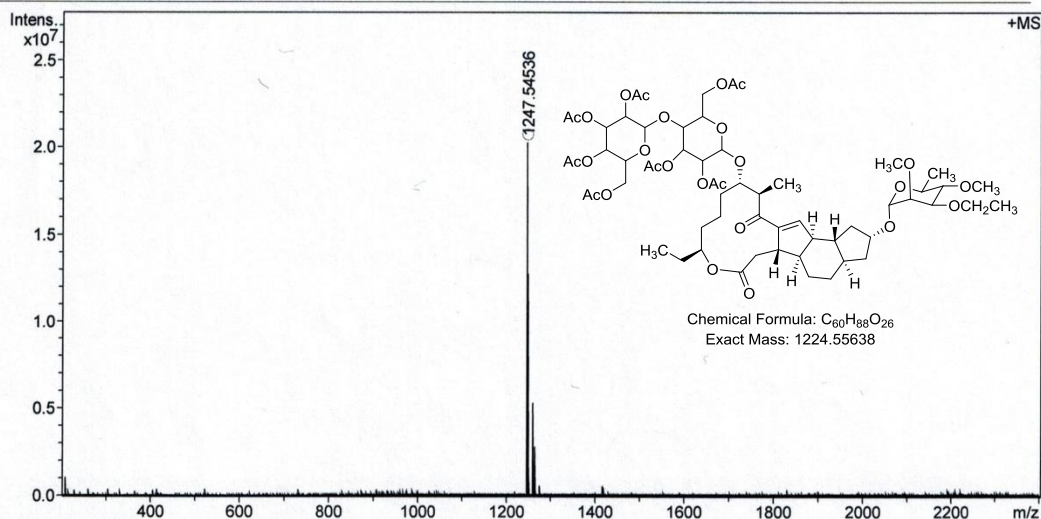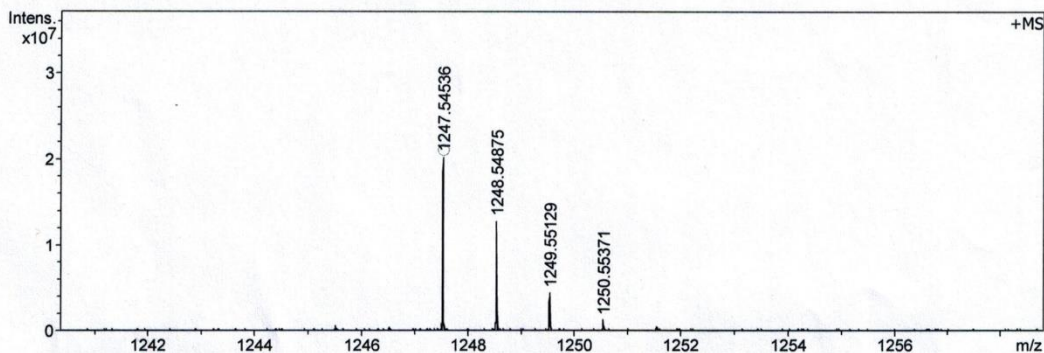

| Meas. m/z   | # | Ion Formula                                       | Score  | m/z         | err [ppm] | Mean err [ppm] | mSigma | rdb  | e <sup>-</sup> Conf | N-Rule |
|-------------|---|---------------------------------------------------|--------|-------------|-----------|----------------|--------|------|---------------------|--------|
| 1247.545361 | 1 | C <sub>60</sub> H <sub>88</sub> NaO <sub>26</sub> | 100.00 | 1247.545604 | 0.2       | 0.3            | 27.5   | 16.5 | even                | ok     |



# MS of 7k

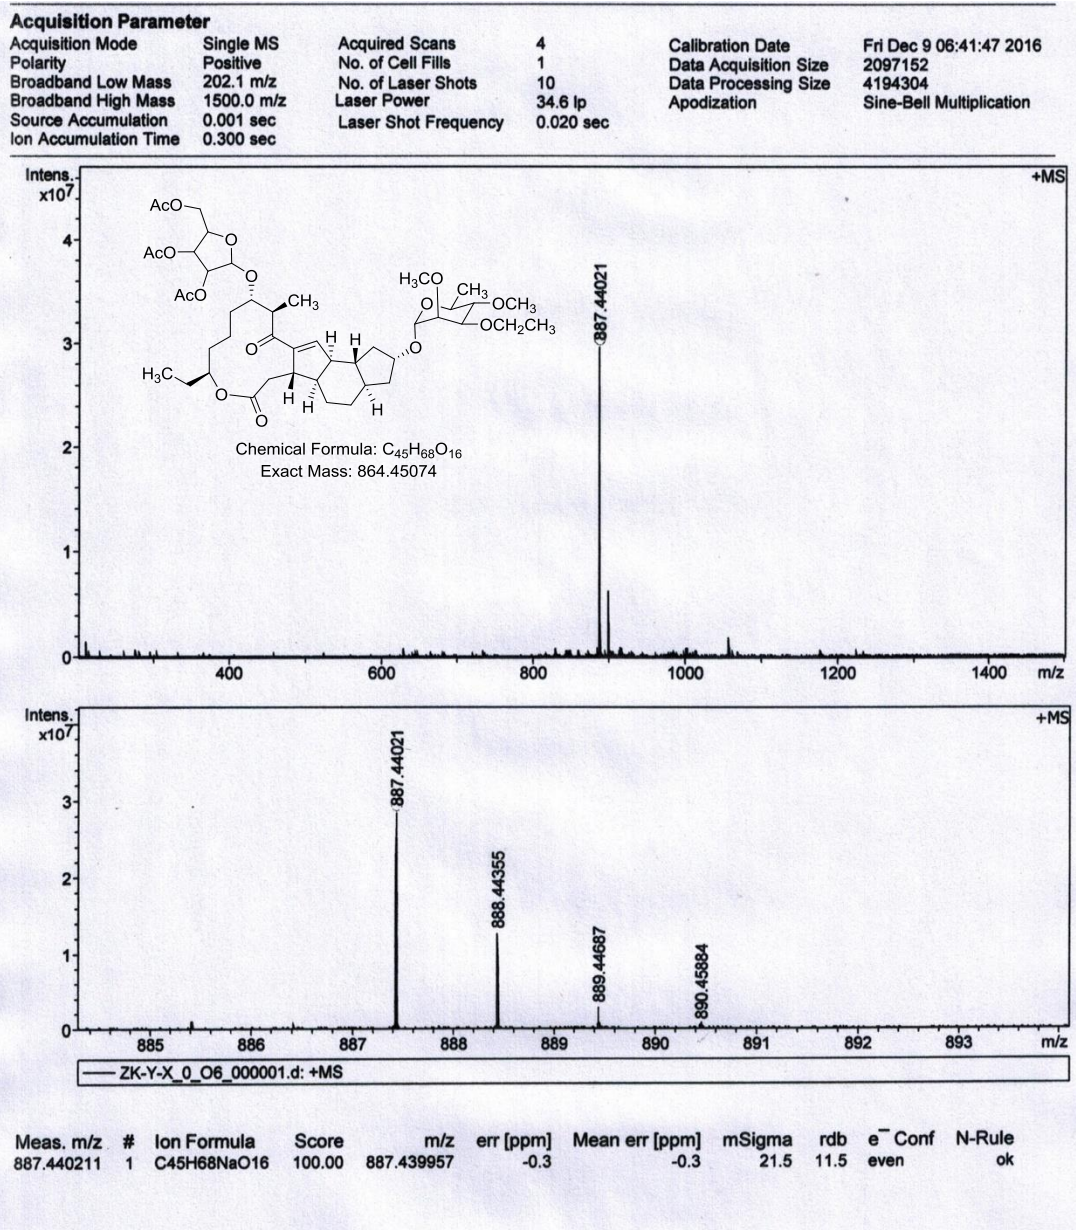

# MS of 71

## Acquisition Parameter

|                       |            |                      |           |                       |                          |
|-----------------------|------------|----------------------|-----------|-----------------------|--------------------------|
| Acquisition Mode      | Single MS  | Acquired Scans       | 5         | Calibration Date      | Fri Dec 23 05:39:24 2016 |
| Polarity              | Positive   | No. of Cell Fills    | 1         | Data Acquisition Size | 2097152                  |
| Broadband Low Mass    | 202.1 m/z  | No. of Laser Shots   | 10        | Data Processing Size  | 4194304                  |
| Broadband High Mass   | 1600.0 m/z | Laser Power          | 35.4 Ip   | Apodization           | Sine-Bell Multiplication |
| Source Accumulation   | 0.001 sec  | Laser Shot Frequency | 0.020 sec |                       |                          |
| Ion Accumulation Time | 1.000 sec  |                      |           |                       |                          |

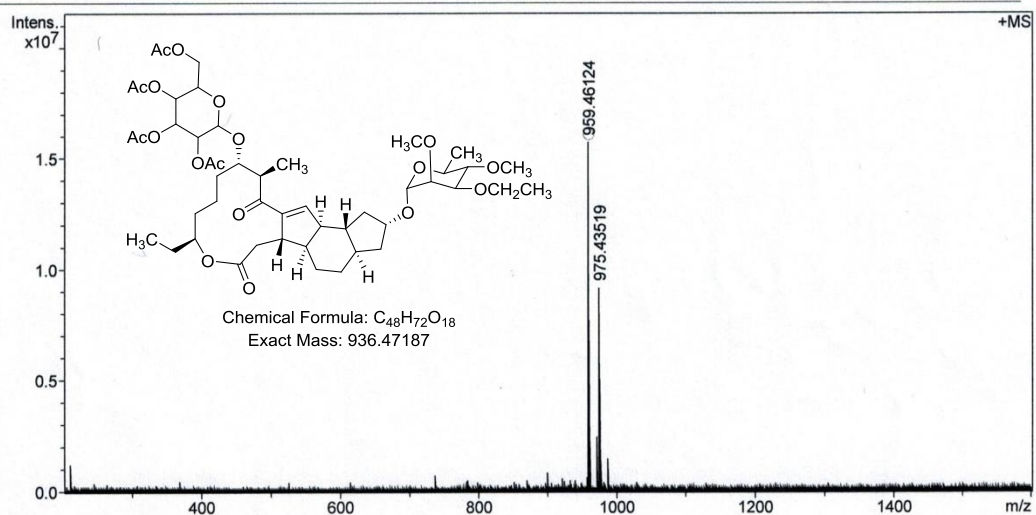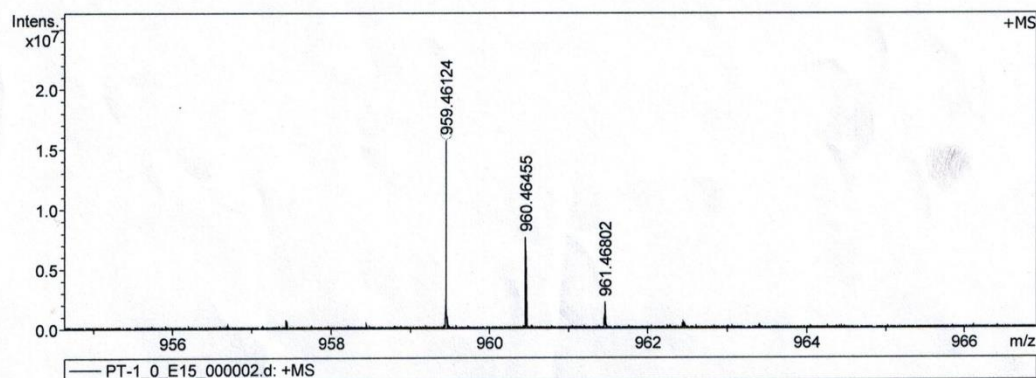

| Meas. m/z  | # | Ion Formula                                       | Score  | m/z        | err [ppm] | Mean err [ppm] | mSigma | rdb  | e <sup>-</sup> Conf | N-Rule |
|------------|---|---------------------------------------------------|--------|------------|-----------|----------------|--------|------|---------------------|--------|
| 959.461240 | 1 | C <sub>48</sub> H <sub>72</sub> NaO <sub>18</sub> | 100.00 | 959.461086 | 0.2       | -0.2           | 25.2   | 12.5 | even                | ok     |

# MS of 8a

## Acquisition Parameter

|                       |            |                      |           |                       |                          |
|-----------------------|------------|----------------------|-----------|-----------------------|--------------------------|
| Acquisition Mode      | Single MS  | Acquired Scans       | 4         | Calibration Date      | Fri Jun 3 05:53:25 2016  |
| Polarity              | Positive   | No. of Cell Fills    | 1         | Data Acquisition Size | 2097152                  |
| Broadband Low Mass    | 202.1 m/z  | No. of Laser Shots   | 10        | Data Processing Size  | 4194304                  |
| Broadband High Mass   | 1300.0 m/z | Laser Power          | 28.2 lp   | Apodization           | Sine-Bell Multiplication |
| Source Accumulation   | 0.001 sec  | Laser Shot Frequency | 0.020 sec |                       |                          |
| Ion Accumulation Time | 0.800 sec  |                      |           |                       |                          |

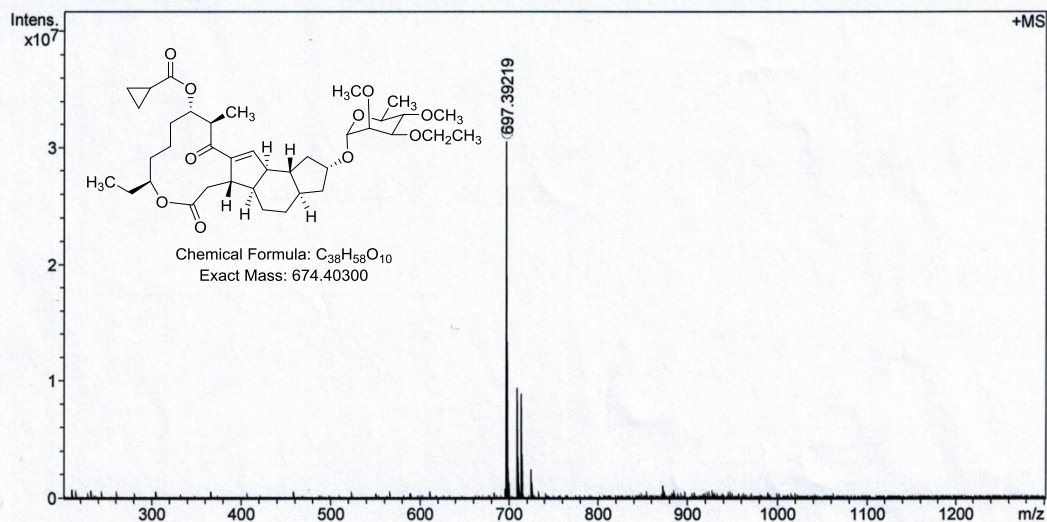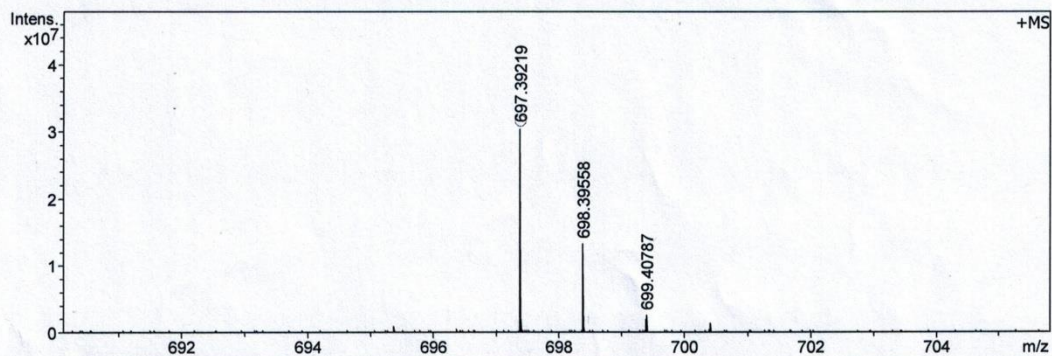

| Meas. m/z  | # | Ion Formula                                       | Score  | m/z        | err [ppm] | Mean err [ppm] | mSigma | rdb | e <sup>-</sup> Conf | N-Rule |
|------------|---|---------------------------------------------------|--------|------------|-----------|----------------|--------|-----|---------------------|--------|
| 697.392189 | 1 | C <sub>38</sub> H <sub>58</sub> NaO <sub>10</sub> | 100.00 | 697.392219 | -0.0      | 0.0            | 55.0   | 9.5 | even                | ok     |



# MS of 8b

## Acquisition Parameter

|                       |            |                      |           |                       |                          |
|-----------------------|------------|----------------------|-----------|-----------------------|--------------------------|
| Acquisition Mode      | Single MS  | Acquired Scans       | 3         | Calibration Date      | Fri Jun 3 05:53:25 2016  |
| Polarity              | Positive   | No. of Cell Fills    | 1         | Data Acquisition Size | 2097152                  |
| Broadband Low Mass    | 202.1 m/z  | No. of Laser Shots   | 10        | Data Processing Size  | 4194304                  |
| Broadband High Mass   | 1300.0 m/z | Laser Power          | 28.2 lp   | Apodization           | Sine-Bell Multiplication |
| Source Accumulation   | 0.001 sec  | Laser Shot Frequency | 0.020 sec |                       |                          |
| Ion Accumulation Time | 0.800 sec  |                      |           |                       |                          |

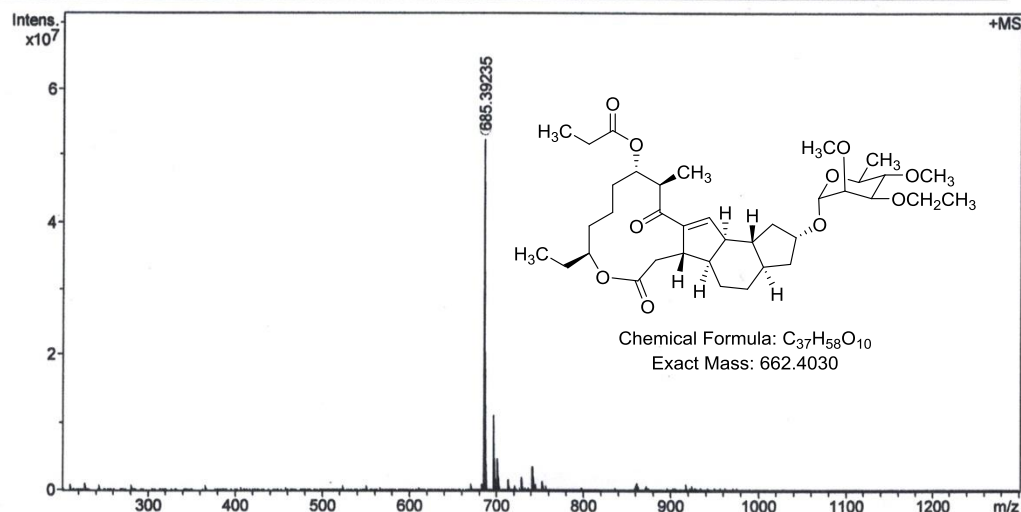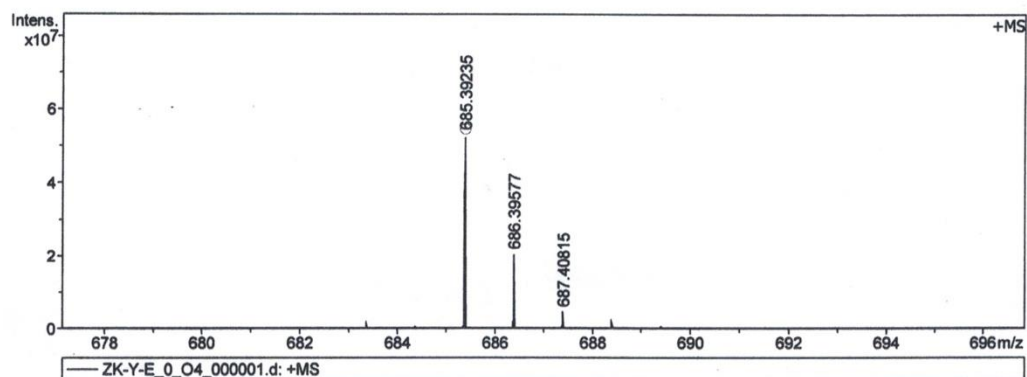

| Meas. m/z  | # | Ion Formula                                       | Score  | m/z        | err [ppm] | Mean err [ppm] | mSigma | rdB | e <sup>-</sup> Conf | N-Rule |
|------------|---|---------------------------------------------------|--------|------------|-----------|----------------|--------|-----|---------------------|--------|
| 685.392352 | 1 | C <sub>37</sub> H <sub>58</sub> NaO <sub>10</sub> | 100.00 | 685.392219 | 0.2       | -0.2           | 53.2   | 8.5 | even                | ok     |



# MS of 8c

## Acquisition Parameter

|                       |            |                      |           |                       |                          |
|-----------------------|------------|----------------------|-----------|-----------------------|--------------------------|
| Acquisition Mode      | Single MS  | Acquired Scans       | 3         | Calibration Date      | Fri Jun 3 05:53:25 2016  |
| Polarity              | Positive   | No. of Cell Fills    | 1         | Data Acquisition Size | 2097152                  |
| Broadband Low Mass    | 202.1 m/z  | No. of Laser Shots   | 10        | Data Processing Size  | 4194304                  |
| Broadband High Mass   | 1300.0 m/z | Laser Power          | 28.2 lp   | Apodization           | Sine-Bell Multiplication |
| Source Accumulation   | 0.001 sec  | Laser Shot Frequency | 0.020 sec |                       |                          |
| Ion Accumulation Time | 0.800 sec  |                      |           |                       |                          |

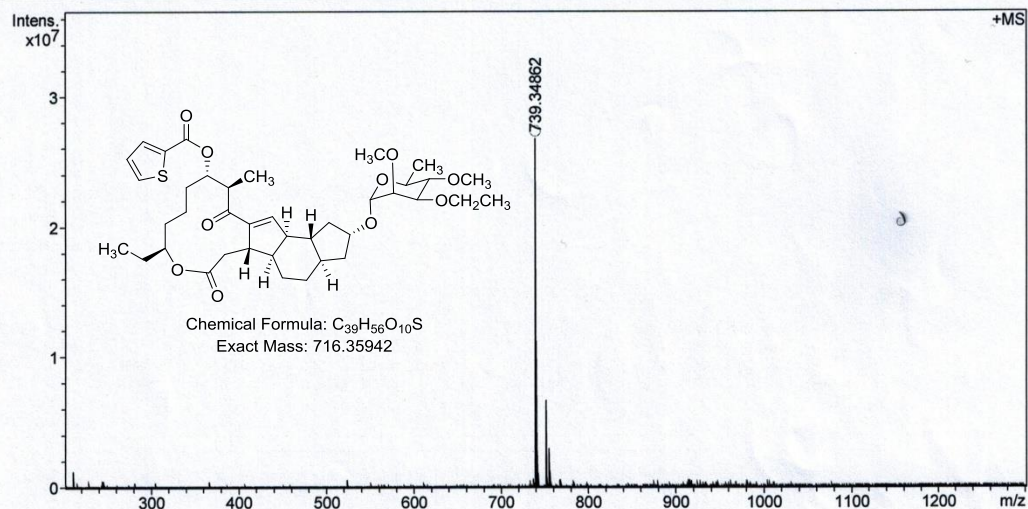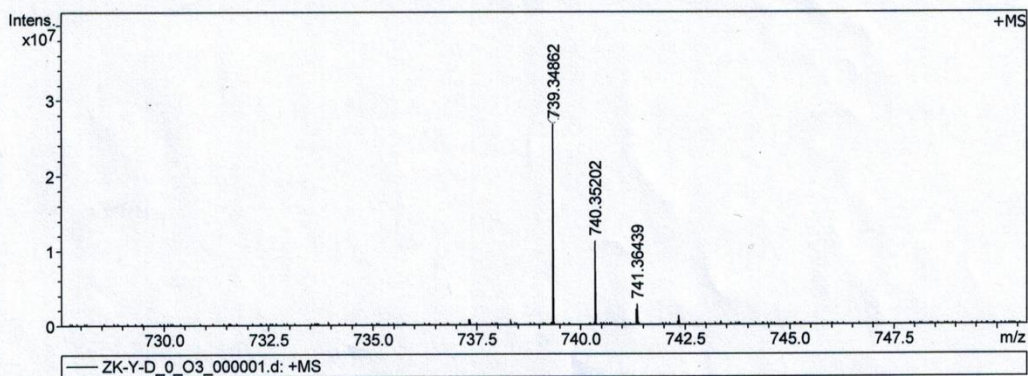

| Meas. m/z  | # | Ion Formula                                         | Score  | m/z        | err [ppm] | Mean err [ppm] | mSigma | rdb  | e <sup>-</sup> Conf | N-Rule |
|------------|---|-----------------------------------------------------|--------|------------|-----------|----------------|--------|------|---------------------|--------|
| 739.348619 | 1 | C <sub>39</sub> H <sub>56</sub> NaO <sub>10</sub> S | 100.00 | 739.348640 | 0.0       | -0.0           | 74.5   | 11.5 | even                | ok     |

# MS of 8d

## Acquisition Parameter

|                       |            |                      |           |                       |                          |
|-----------------------|------------|----------------------|-----------|-----------------------|--------------------------|
| Acquisition Mode      | Single MS  | Acquired Scans       | 4         | Calibration Date      | Fri Jun 3 05:53:25 2016  |
| Polarity              | Positive   | No. of Cell Fills    | 1         | Data Acquisition Size | 2097152                  |
| Broadband Low Mass    | 202.1 m/z  | No. of Laser Shots   | 10        | Data Processing Size  | 4194304                  |
| Broadband High Mass   | 1300.0 m/z | Laser Power          | 28.2 lp   | Apodization           | Sine-Bell Multiplication |
| Source Accumulation   | 0.001 sec  | Laser Shot Frequency | 0.020 sec |                       |                          |
| Ion Accumulation Time | 0.800 sec  |                      |           |                       |                          |

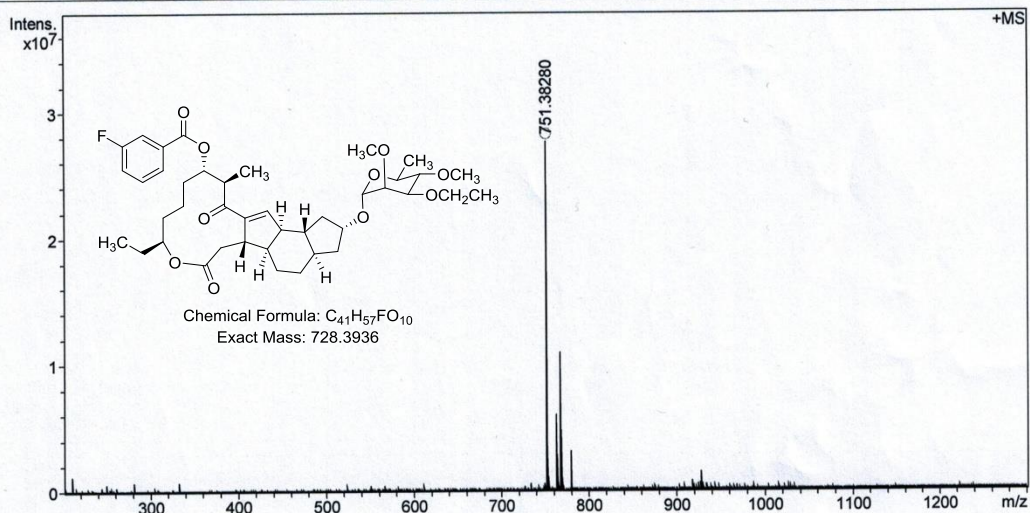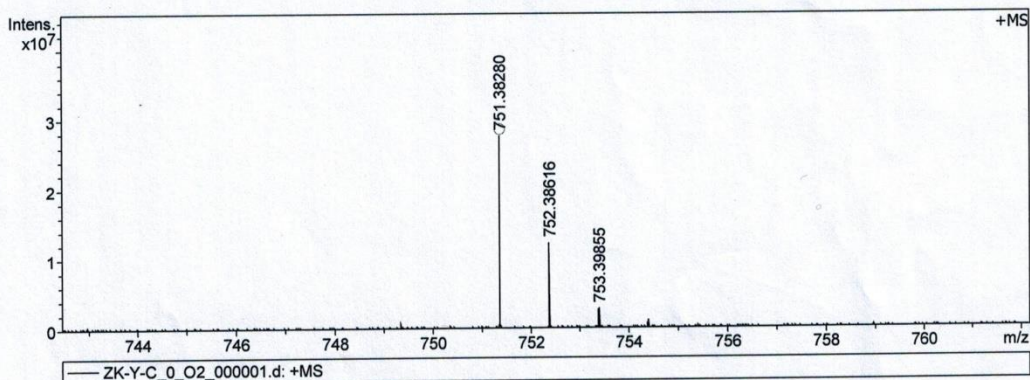

| Meas. m/z  | # | Ion Formula                                                     | Score  | m/z        | err [ppm] | Mean err [ppm] | mSigma | rdB  | e <sup>-</sup> Conf | N-Rule |
|------------|---|-----------------------------------------------------------------|--------|------------|-----------|----------------|--------|------|---------------------|--------|
| 751.382804 | 1 | C <sub>41</sub> H <sub>57</sub> FN <sub>2</sub> O <sub>10</sub> | 100.00 | 751.382797 | 0.0       | 0.0            | 55.3   | 12.5 | even                | ok     |

# MS of 8e

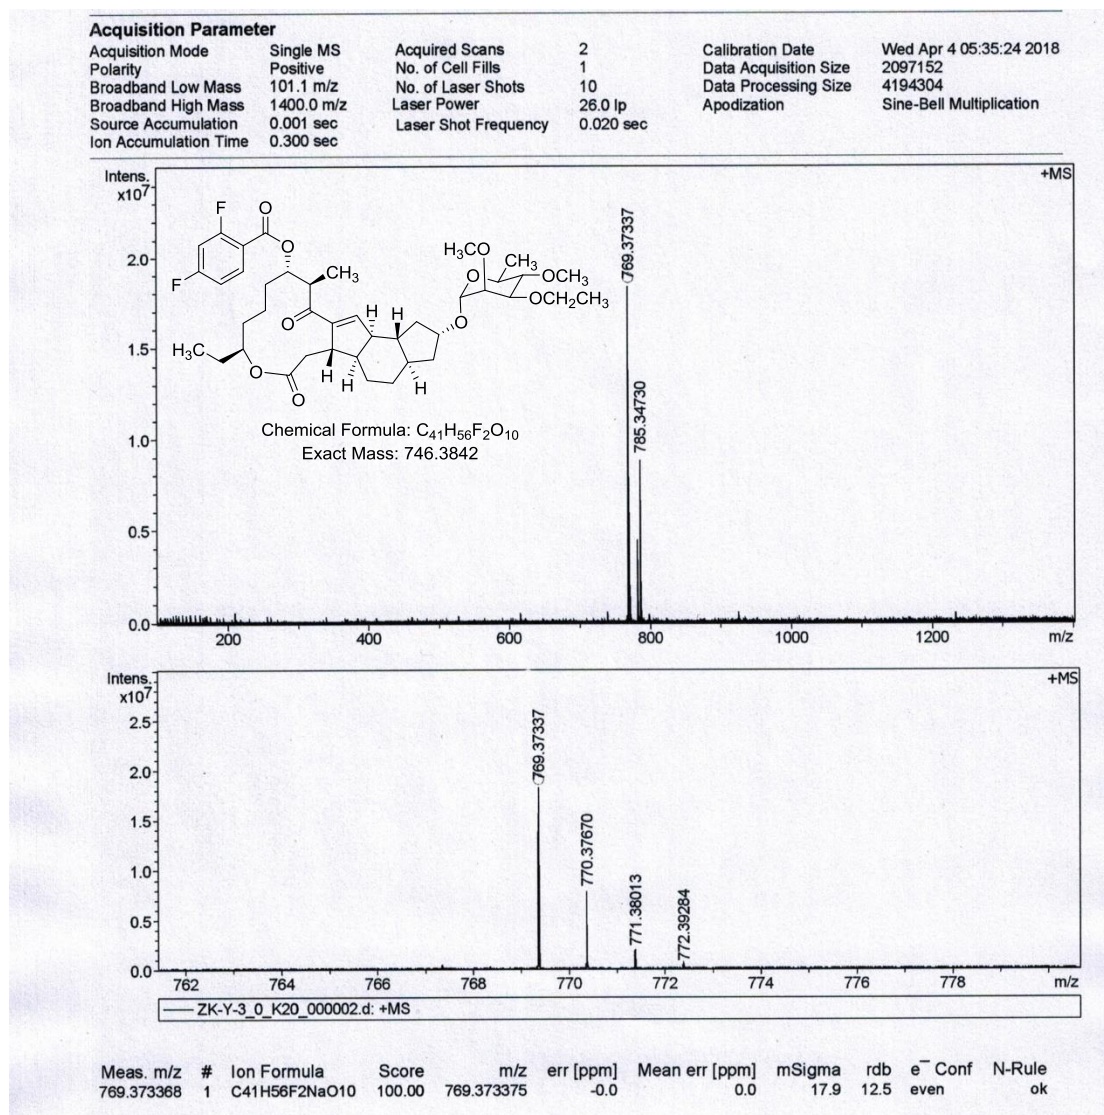



# MS of 8f

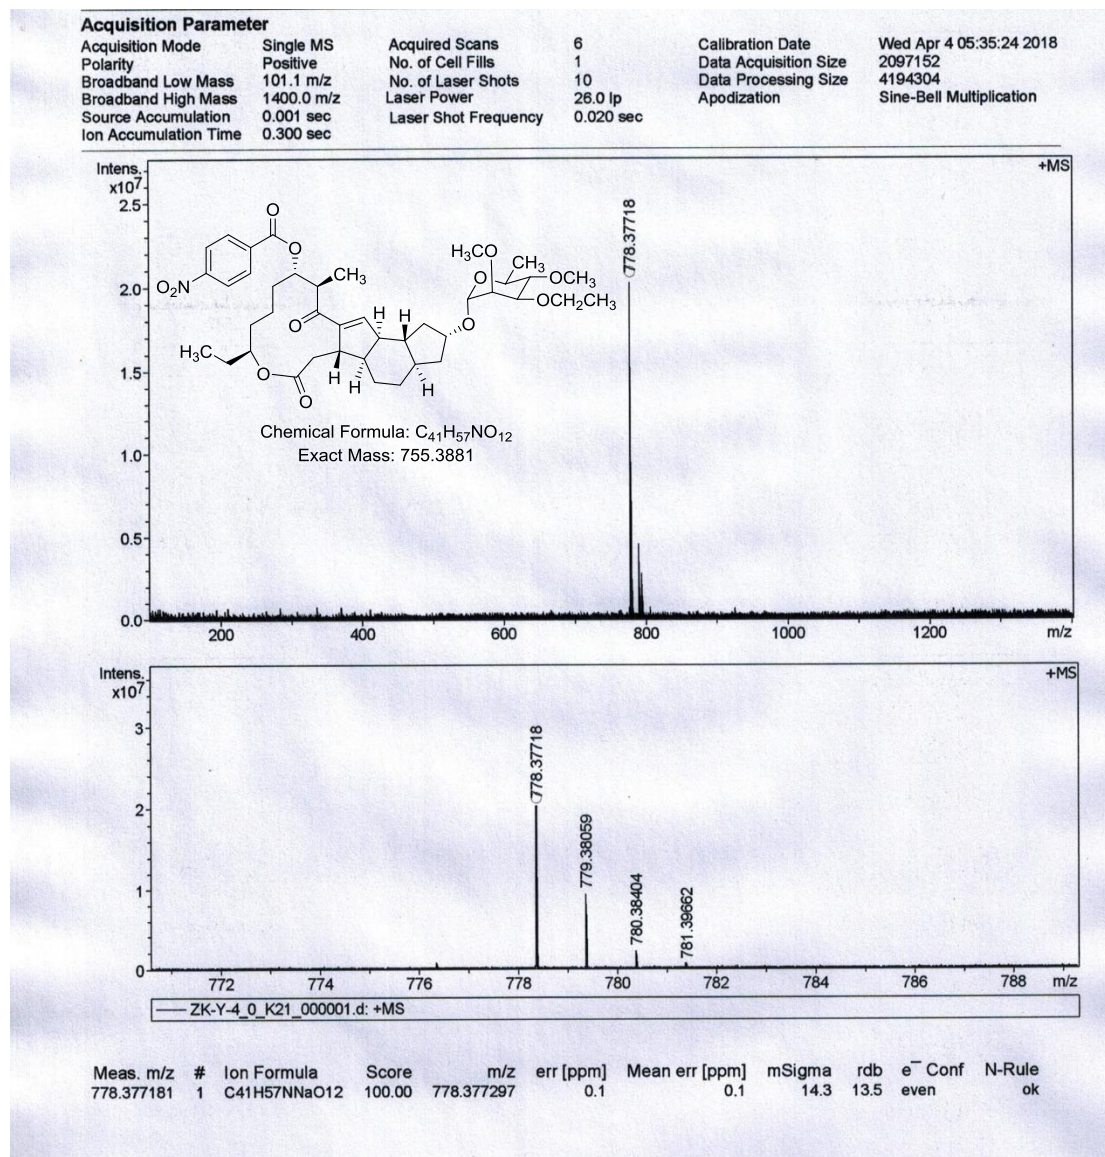

# MS of 8g

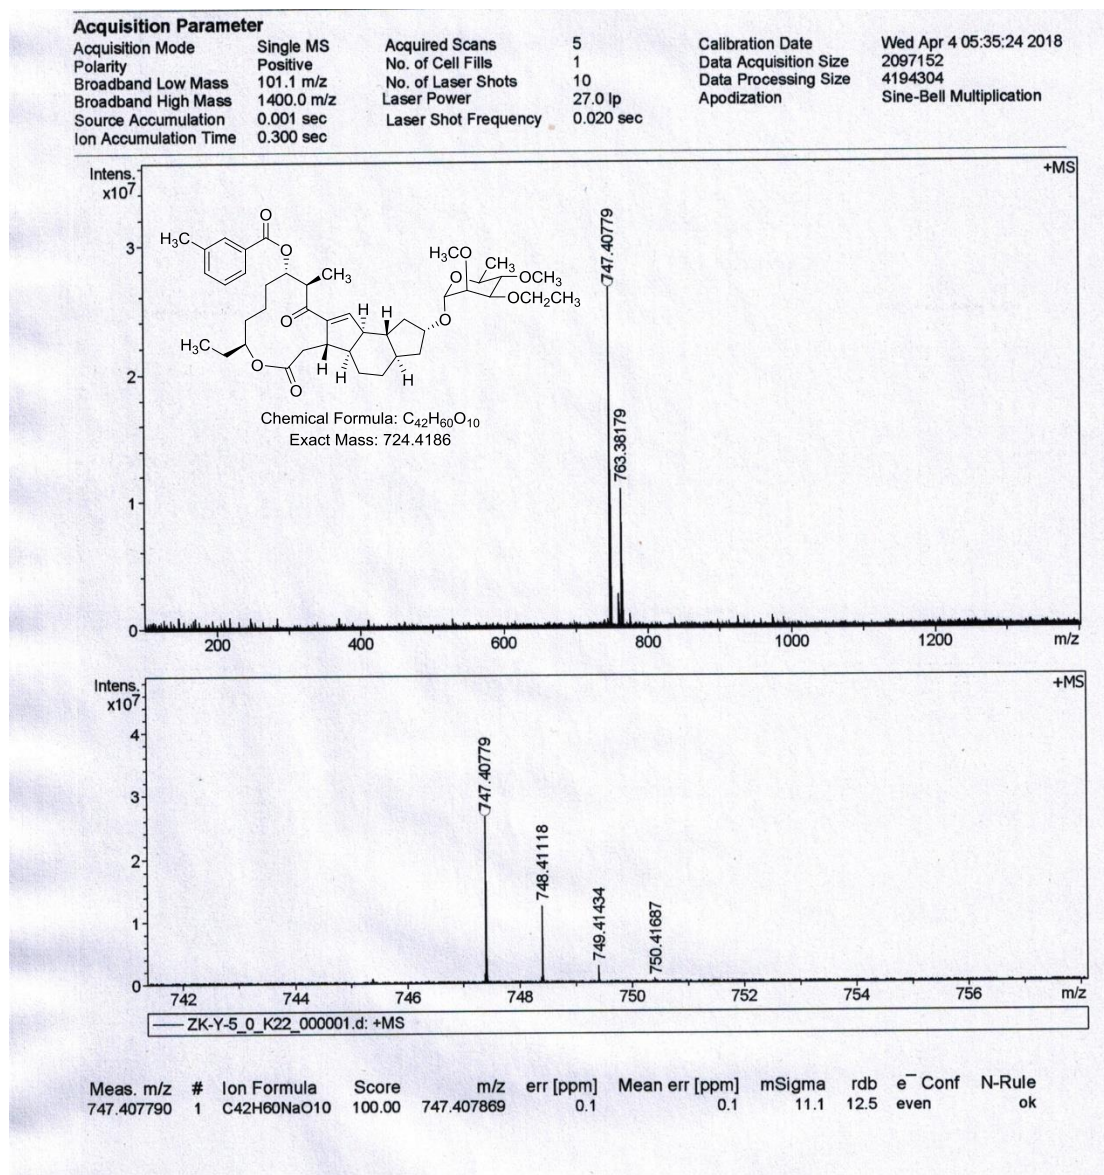



# MS of 8h

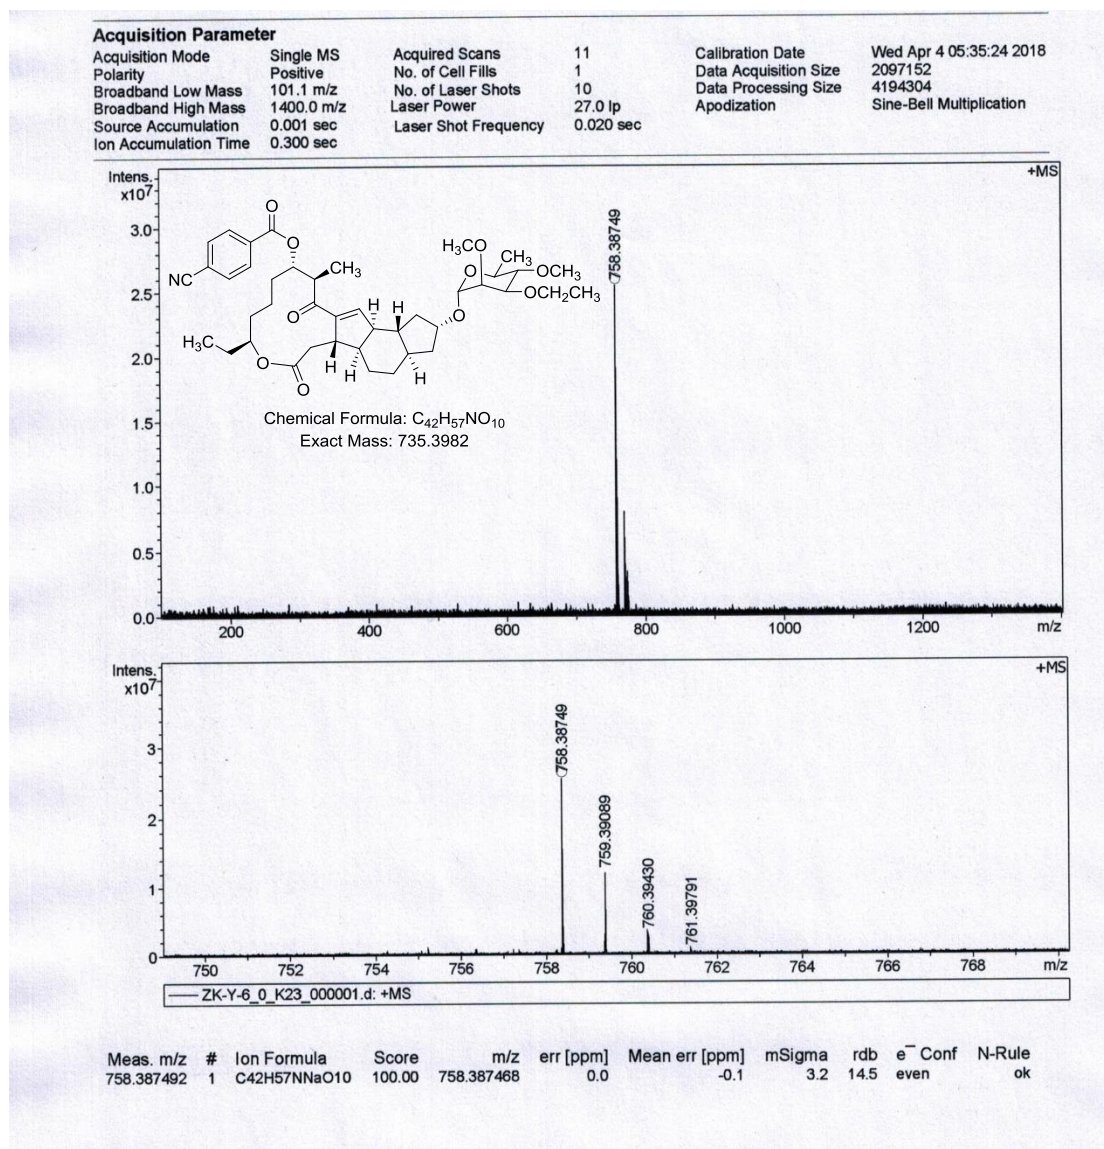

# MS of 8i

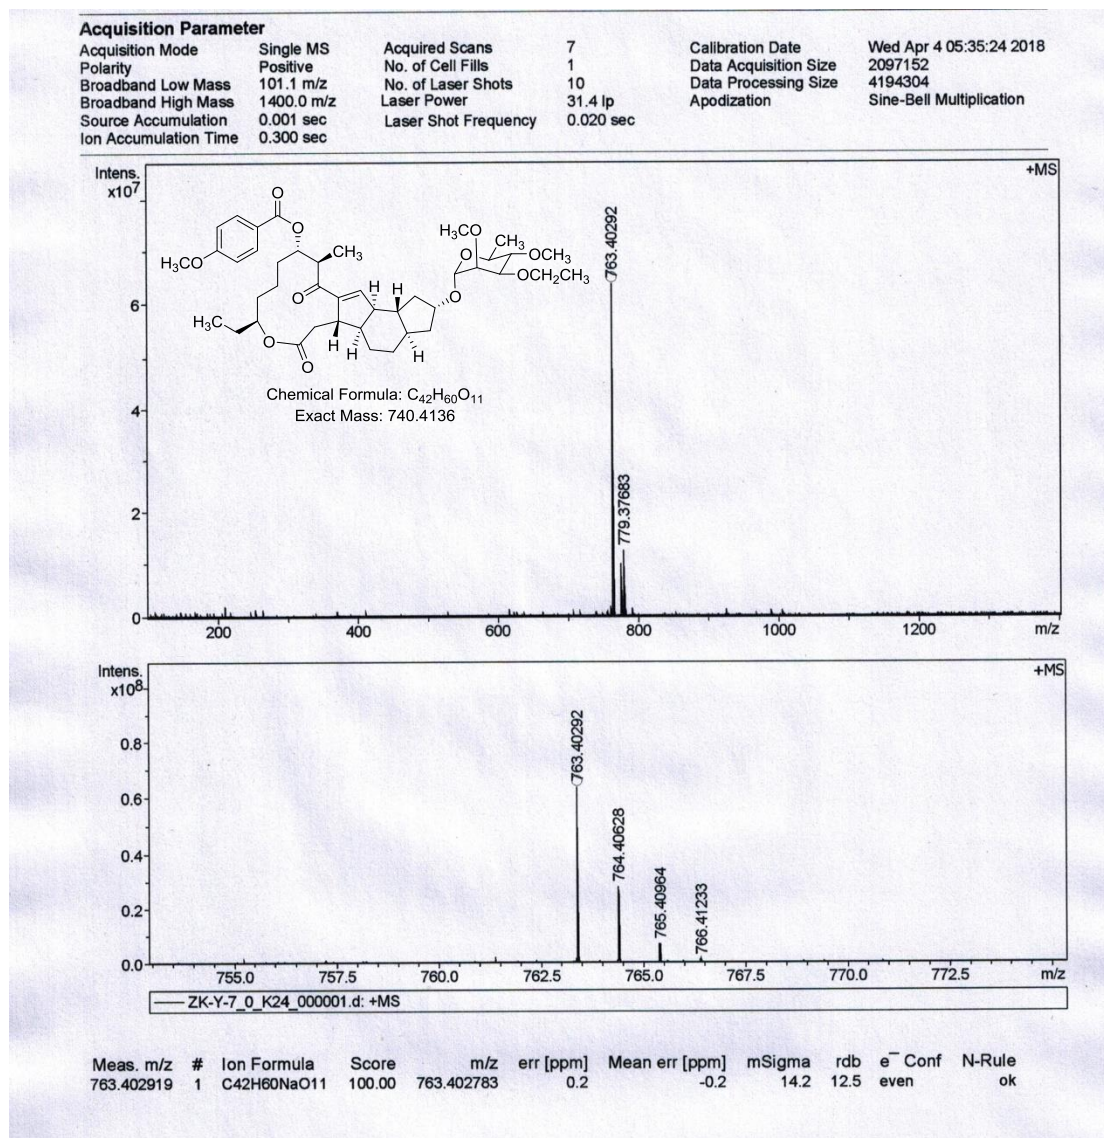

Supplement: Additional file 1 [file 1860-5397-14-207-S1.pdf]
